# Supplementary material for: Megamerger of porphyrin (phthalocyanine) with azulene-based graphene nanosheets for high-performance nonlinear optical materials
Source: Royal Society of Chemistry journal article supplement (doi:10.1039/d4qm01074d), 2025-01-01
Supplement: d4qm01074d1.pdf [file d4qm01074d1.pdf]

## Supporting information

# Megamerger of porphyrin (phthalocyanine) with azulene based graphene nanosheet for high-performance nonlinear optical materials

Ya Qing Zhang<sup>a</sup>, Cui-Cui Yang,<sup>b\*</sup> Li Li<sup>a</sup>, Wei Quan Tian<sup>a\*</sup>

<sup>a</sup>Chongqing Key Laboratory of Chemical Theory and Mechanism, College of Chemistry and Chemical Engineering, Chongqing University, Huxi Campus, Chongqing 401331, P. R. China

<sup>b</sup>College of Science, Chongqing University of Technology, Huaxi Campus, Chongqing 400054, P. R. China

\*Corresponding author: yangcc@cqut.edu.cn; tianwq@cqu.edu.cn

### Supporting Information list:

**Figure S1** Structures of porphyrin and phthalocyanine derivatives. A: azulene; P: porphyrin; P<sub>N</sub>: N-substituted porphyrin; Pc: phthalocyanine; Pc<sub>N</sub>: N-substituted phthalocyanine, M = Mg, Ni, Zn; Atoms in black are carbon and in blue are nitrogen.

**Figure S2** Evolution of the static first hyperpolarizability ( $\langle\beta_0\rangle$ ) and the static second hyperpolarizability ( $\langle\gamma_0\rangle$ ) with the numbers of excited states in P<sub>N</sub>-A-A and P<sub>N</sub>-3A-A, respectively.

**Figure S3** The frontier molecular orbitals (H: HOMO; L: LUMO) correlation and energy diagrams of P-3A and P<sub>N</sub>-3A predicted with B3LYP/6-31G (d, p).

**Figure S4** Evolution of the static first hyperpolarizability ( $\langle\beta_0\rangle$ ) (in  $10^{-30}$  esu) with the electron excitation in M-P-mA, M-P<sub>N</sub>-mA-N, M-P<sub>N</sub>-mA-A and M-Pc-mA-N predicted by using CAM-B3LYP/6-31++G (d, p).

**Figure S5** The two-dimensional second order nonlinear optical spectra (in  $10^{-30}$  esu) of (a) P<sub>N</sub>-3A-A, (b) Mg-P<sub>N</sub>-3A-A and (c) Ni-P<sub>N</sub>-3A-A scanned up to 7.00 eV with a step size of 0.05 eV by using TD-CAM-B3LYP/6-31++G (d, p) and the sum-over-states model.

**Figure S6** The two-dimensional second order NLO spectra predicted with TD-CAM-B3LYP/6-31++G (d, p)-SOS [damping coefficients  $\Gamma_m = 0.01 \times \epsilon_m/\epsilon_2$ ] of (a) and (b) P<sub>N</sub>-3A-A, (c) Mg-P<sub>N</sub>-3A-A, (d) and (e) Ni-P<sub>N</sub>-3A-A with step size of 0.005 eV .

**Figure S7** The evolution of third order nonlinear optic properties with electron excitations of P<sub>N</sub>-3A-A at

specific external fields.

**Figure S8** The evolution of third order nonlinear optic properties with electron excitations of Mg-P<sub>N</sub>-3A-A at specific external fields.

**Figure S9** The evolution of third order nonlinear optic properties with electron excitations of Ni-P<sub>N</sub>-3A-A at specific external fields.

**Figure S10** The two-dimensional two-photon absorption spectra of (a) P<sub>N</sub>-3A-A, (b) Mg-P<sub>N</sub>-3A-A and (c) Ni-P<sub>N</sub>-3A-A scanned up to 7.00 eV with a step size of 0.05 eV.

**Figure S11** (a) Fine-scanned TDTPA of P<sub>N</sub>-3A-A from 1.11 eV to 2.10 eV; (b) Fine-scanned TDTPA of Mg-P<sub>N</sub>-3A-A from 1.15 eV to 1.45 eV; (c) Fine-scanned TDTPA of Ni-P<sub>N</sub>-3A-A from 1.15 eV to 1.45 eV.

**Table S1** The lowest vibrational frequency (LVF, in cm<sup>-1</sup>), energy gap ( $E_{\text{gap}}$ , in eV) between the HOMO ( $E_{\text{H}}$ , in eV) and the LUMO ( $E_{\text{L}}$ , in eV) the static first and second hyperpolarizability ( $\langle\beta_0\rangle$  and  $\langle\gamma_0\rangle$ ), the  $\langle\beta_0\rangle$  (in 10<sup>-30</sup> esu) and  $\langle\gamma_0\rangle$  (in 10<sup>-34</sup> esu) per heavy atom ( $\langle\beta_0\rangle/N$  and  $\langle\gamma_0\rangle/N$ ) of porphyrin derivatives series of molecules in closed-shell singlet predicted with B3LYP/6-31G (d, p) and TD-CAM-B3LYP/6-31++G (d, p)-SOS, respectively. The relative electronic energy differences ( $\Delta E_{\text{OS-CS}}$  and  $\Delta E_{\text{T-CS}}$ , in kcal/mol) between open-shell singlet (OS) or triplet (T) and closed-shell singlet (CS) (CS is taken as reference), and spin contamination of open-shell singlet ( $\langle S^2 \rangle_{\text{OS}}$ ) obtained at the UB3LYP/6-31G (d, p) level.

**Table S2** Major electronic spectra absorption peaks with transition nature in P<sub>N</sub>-3A-A, Mg-P<sub>N</sub>-3A-A and Ni-P<sub>N</sub>-3A-A ( $f$  is the oscillator strength in the arbitrary unit,  $E$  is the transition energy in eV unit,  $\lambda$  is the wavelength in nm unit, TNMC to  $\langle\beta_0\rangle$  is the transition nature of electron excitation with a major contribution to  $\langle\beta_0\rangle$ ,  $\langle\beta_0\rangle_{\text{con}}$  is contribution value to  $\langle\beta_0\rangle$  in 10<sup>-30</sup> esu unit).

**Table S3** Calculated important parameters of  $(\beta_{ijk})_m$  [ $i, j, k \in (x, y, z)$ ] ( $\times 10^{-30}$  esu) of P<sub>N</sub>-3A-A, Mg-P<sub>N</sub>-3A-A and Ni-P<sub>N</sub>-3A-A. The  $[(\beta_{ijk})_m]$  is the first hyperpolarizability tensor of the  $m$ th excited state ( $S_m$ ) with a major contribution to the static first hyperpolarizability ( $\langle\beta_0\rangle$ ),  $m = 0$  is the ground state, and  $m > 0$  is the  $m$ th excited state].

**Table S4** Major electron excitations with transition nature in P<sub>N</sub>-3A-A, Mg-P<sub>N</sub>-3A-A and Ni-P<sub>N</sub>-3A-A.  $f$  is the oscillator strength,  $\lambda$  is the wavelength, and TNMC to  $\langle\gamma_0\rangle_{3L}$  is the transition nature of electron excitation with a major contribution to  $\langle\gamma_0\rangle_{3L}$ .

**Table S5** Important parameters of  $(\gamma_{ijk})_m$  ( $\times 10^{-34}$  esu) of P<sub>N</sub>-3A-A, Mg-P<sub>N</sub>-3A-A and Ni-P<sub>N</sub>-3A-A. The  $(\gamma_{ijk})_m$  is the second hyperpolarizability tensor of the  $m$ th excited state ( $S_m$ ) with a major contribution to the static first hyperpolarizability ( $\langle\gamma_0\rangle$ ),  $m = 0$  is the ground state, and  $m > 0$  is the  $m$ th excited state. ( $\gamma_{xxxx}$  represents  $\gamma$

along the X direction,  $\gamma_{yyy}$  represents  $\gamma$  along the Y direction)

**Table S6** Important parameters of  $(\gamma_{ijk})_m (\times 10^{-34} \text{ esu})$  of P<sub>N</sub>-3A-A, Mg-P<sub>N</sub>-3A-A and Ni-P<sub>N</sub>-3A-A. The  $(\gamma_{ijk})_m$  is the second hyperpolarizability tensor of the  $m^{\text{th}}$  excited state ( $S_m$ ) with a major contribution to the static first hyperpolarizability ( $\langle \gamma_0 \rangle$ ),  $m = 0$  is the ground state, and  $m > 0$  is the  $m^{\text{th}}$  excited state. ( $\gamma_{xxx}$  represents  $\gamma$  along the X direction,  $\gamma_{yyy}$  represents  $\gamma$  along the Y direction)

**Table S7** The strong response and corresponding major electron excitation contribution of the dynamic third order nonlinear optic process for P<sub>N</sub>-3A-A. TPA is in  $10^{-50} \text{ cm}^4 \cdot \text{s}/\text{photon}$ . DFWM, THG and EFISH are in  $10^{-34} \text{ esu}$ .

**Table S8** The strong response and corresponding major electron excitation contribution of the dynamic third order nonlinear optic process for Mg-P<sub>N</sub>-3A-A. TPA is in  $10^{-50} \text{ cm}^4 \cdot \text{s}/\text{photon}$ . DFWM, THG and EFISH are in  $10^{-34} \text{ esu}$ .

**Table S9** The strong response and corresponding major electron excitation contribution of the dynamic third order nonlinear optic process for Ni-P<sub>N</sub>-3A-A. TPA is in  $10^{-50} \text{ cm}^4 \cdot \text{s}/\text{photon}$ . DFWM, THG and EFISH are in  $10^{-34} \text{ esu}$ .

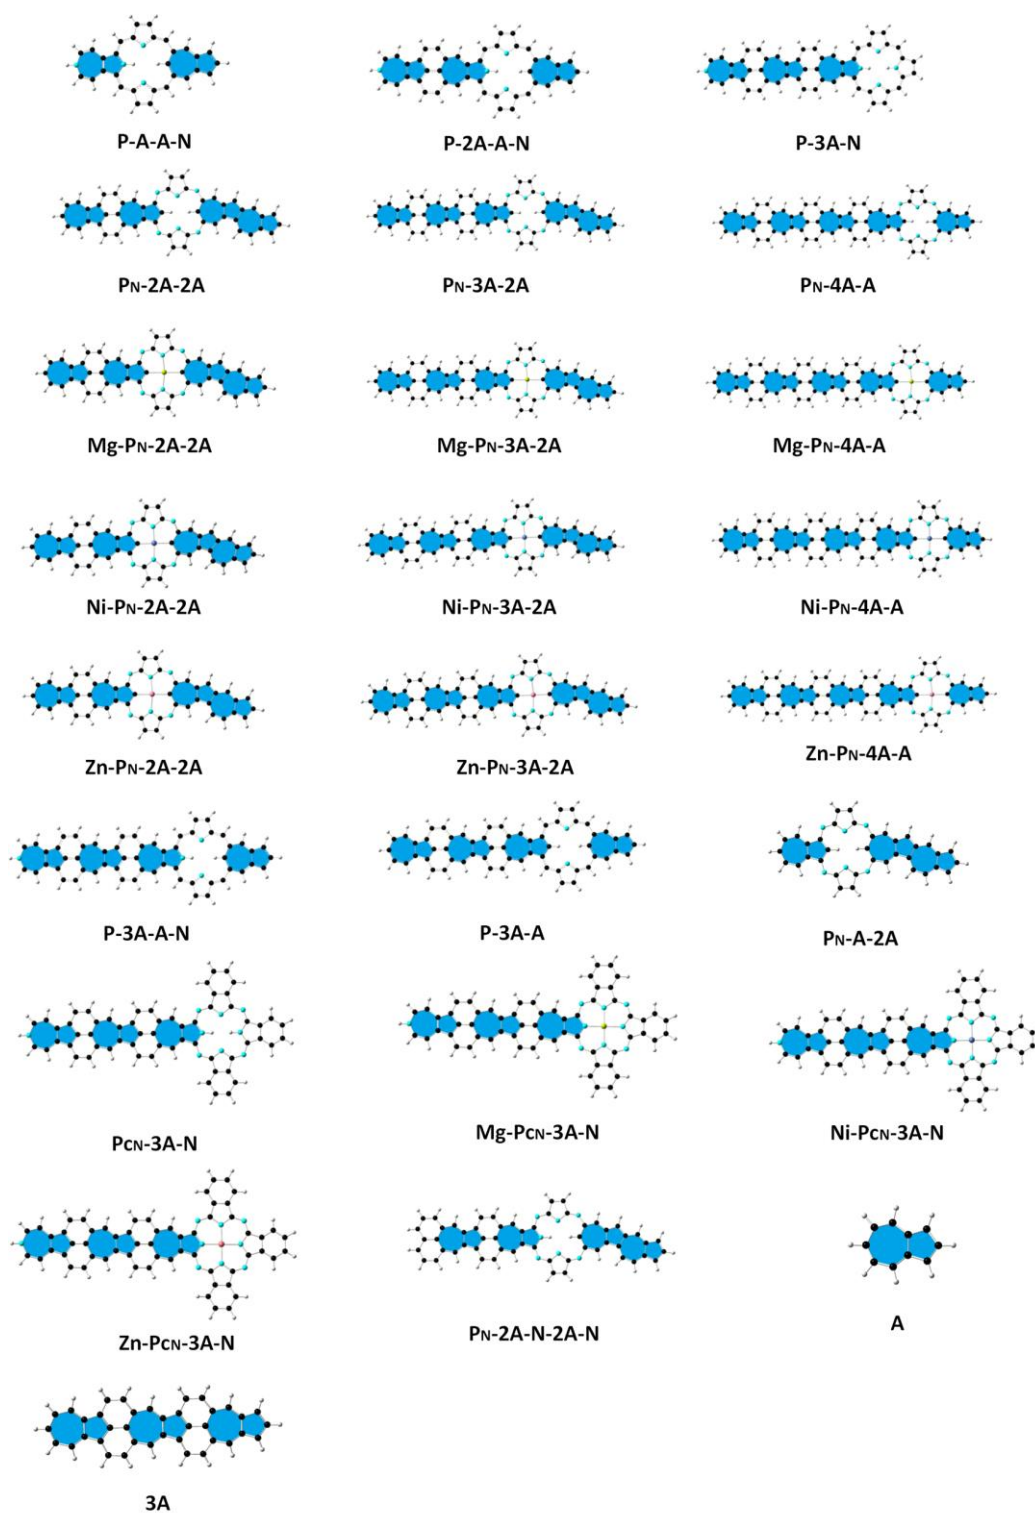

**Figure S1** Structures of porphyrin and phthalocyanine derivatives. A: azulene; P: porphyrin; P<sub>N</sub>: N-substituted porphyrin; Pc: phthalocyanine; Pc<sub>N</sub>: N-substituted phthalocyanine, M = Mg, Ni, Zn; Atoms in black are carbon and in blue are nitrogen.

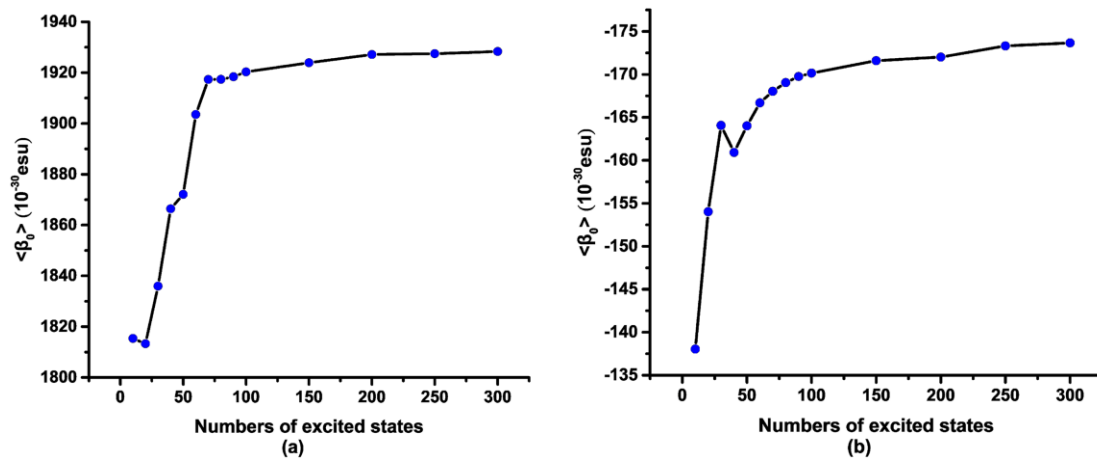

**Figure S2** Evolution of the static first hyperpolarizability ( $\langle\beta_0\rangle$ ) and the static second hyperpolarizability ( $\langle\gamma_0\rangle$ ) with the numbers of excited states in  $P_N$ -A-A and  $P_N$ -3A-A, respectively.

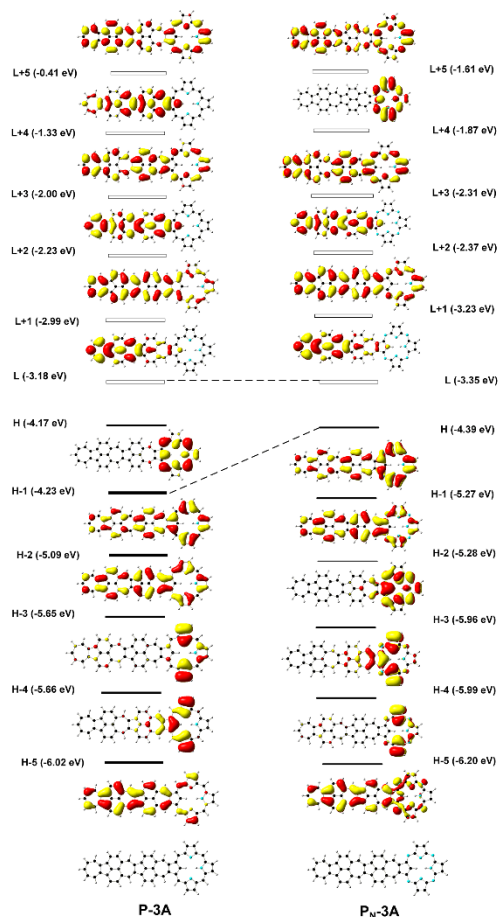

**Figure S3** The frontier molecular orbitals (H: HOMO; L: LUMO) correlation and energy diagrams of P-3A and P<sub>N</sub>-3A predicted with B3LYP/6-31G (d, p).

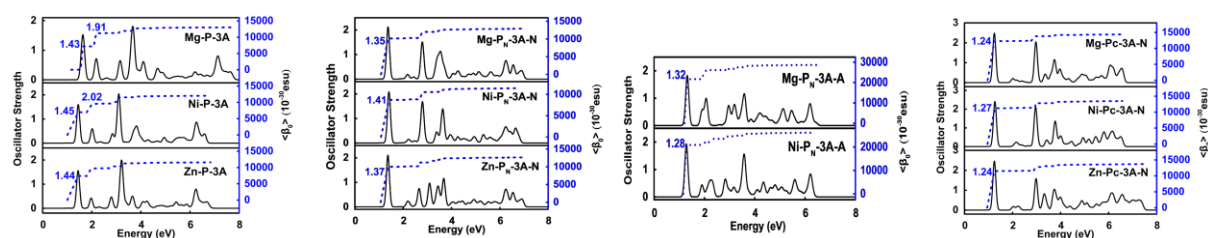

**Figure S4** Evolution of the static first hyperpolarizability ( $\langle\beta_0\rangle$ ) (in  $10^{-30}$  esu) with the electron excitation in M-P-mA, M-P<sub>N</sub>-mA-N, M-P<sub>N</sub>-mA-A and M-Pc-mA-N predicted by using CAM-B3LYP/6-31++G (d, p).

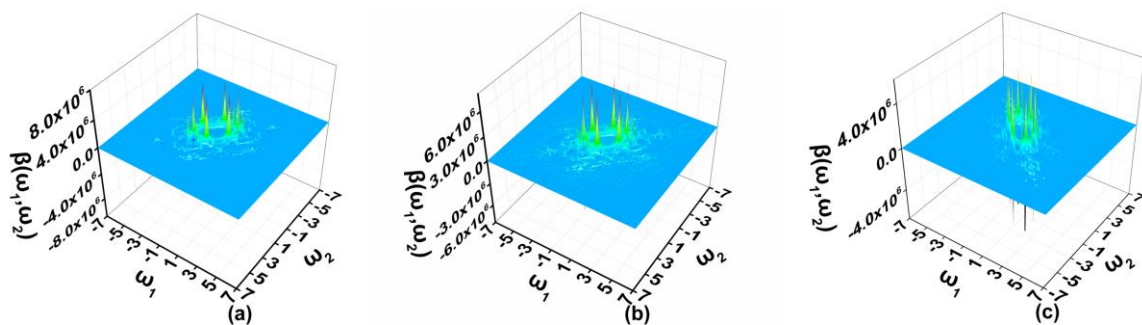

**Figure S5** The two-dimensional second order nonlinear optical spectra (in  $10^{-30}$  esu) of (a) P<sub>N</sub>-3A-A, (b) Mg-P<sub>N</sub>-3A-A and (c) Ni-P<sub>N</sub>-3A-A scanned up to 7.00 eV with a step size of 0.05 eV by using TD-CAM-B3LYP/6–31++G (d, p) and the sum-over-states model.

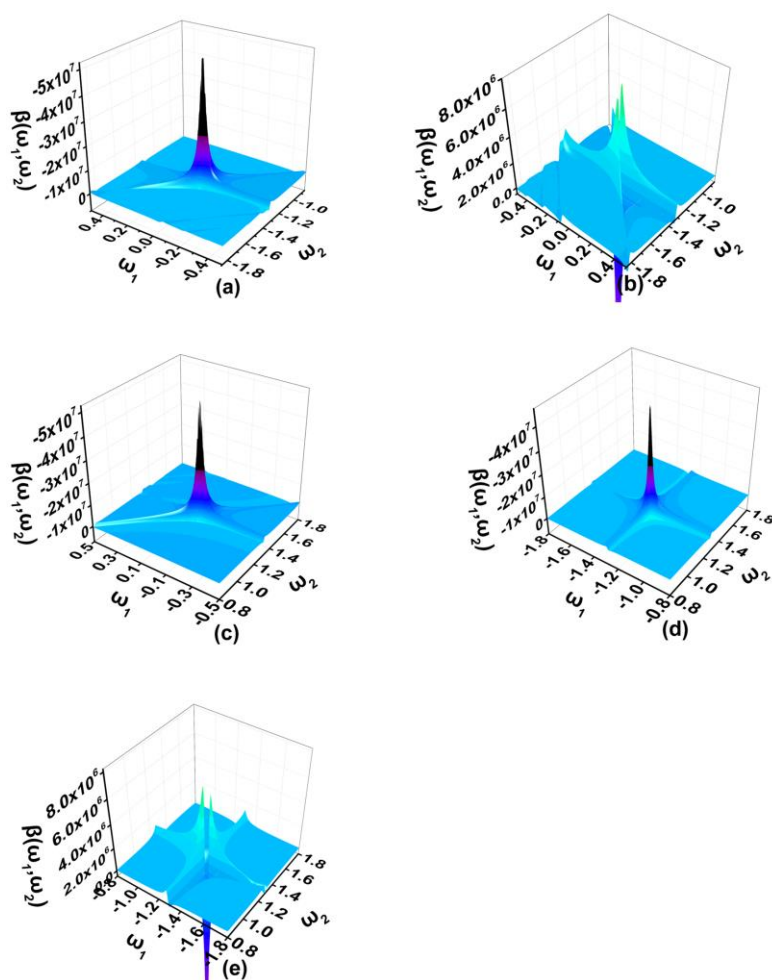

**Figure S6** The two-dimensional second order NLO spectra predicted with TD-CAM-B3LYP/6-31++G (d, p)-SOS [damping coefficients  $\Gamma_m = 0.01 \times \epsilon_m/\epsilon_2$ ] of (a) and (b) P<sub>N</sub>-3A-A, (c) Mg-P<sub>N</sub>-3A-A, (d) and (e) Ni-P<sub>N</sub>-3A-A with step size of 0.005 eV.

TPA: a) TPA -1.30 eV

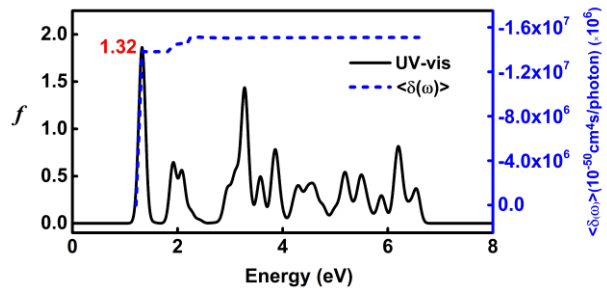

b) TPA -1.35 eV

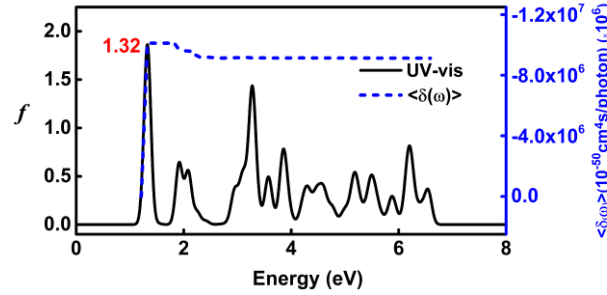

c) TPA -3.40 eV

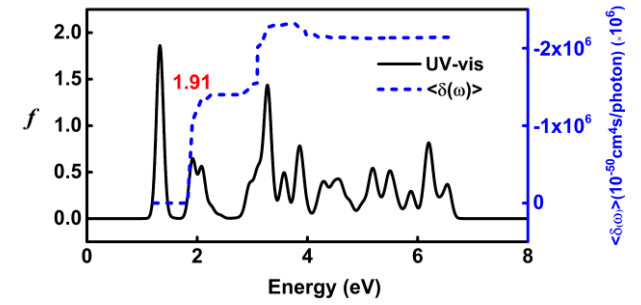

DFWM: a) DFWM -1.30 eV

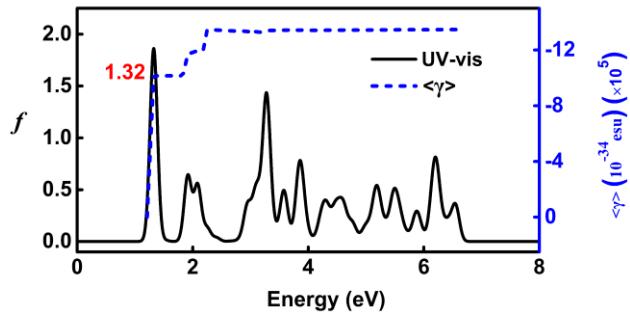

b) DFWM -1.35 eV

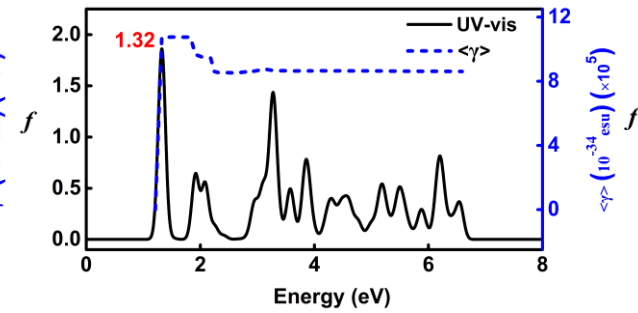

c) DFWM -1.90 eV

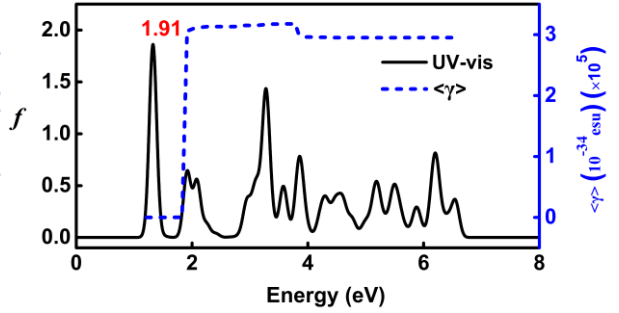



THG: a) THG -0.45 eV

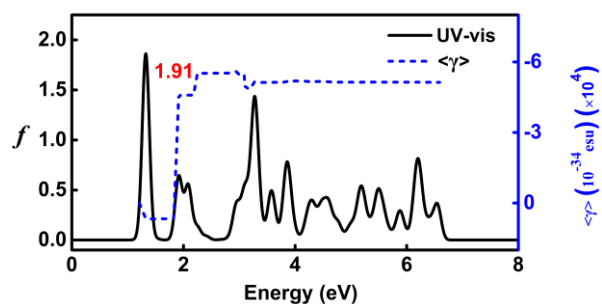

b) THG -0.65 eV

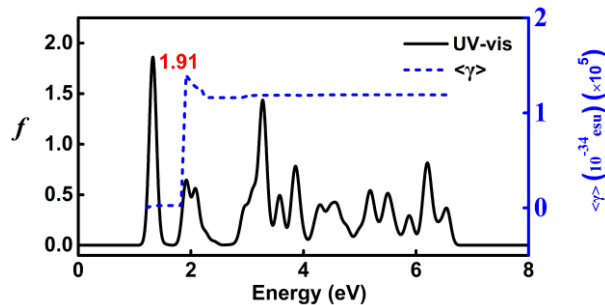

c) THG -1.30 eV

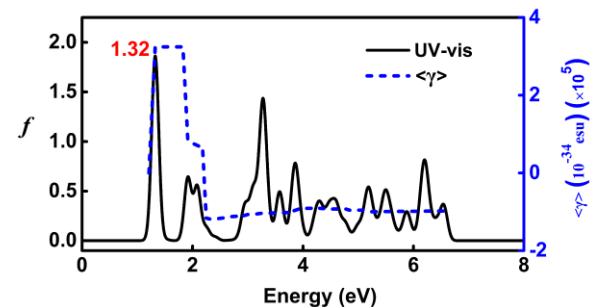

EFISH: a) EFISH -1.30 eV

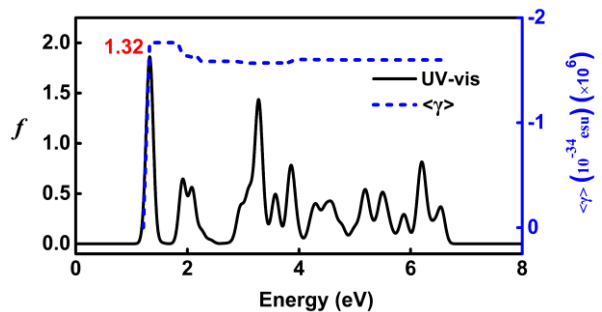

b) EFISH -1.35 eV

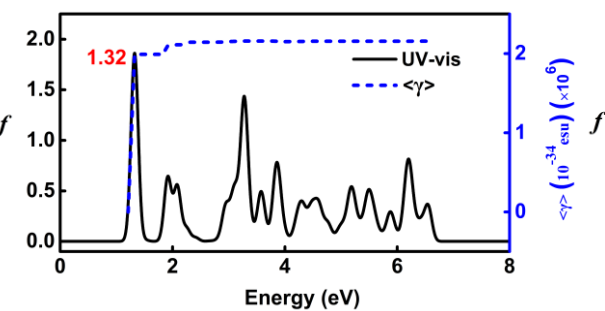

c) EFISH -2.10 eV

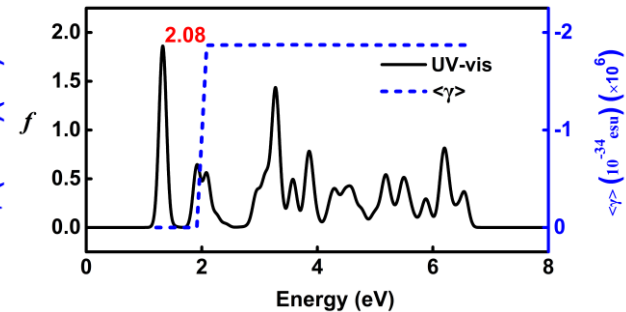

**Figure S7** The evolution of third order nonlinear optic properties with electron excitations of P<sub>N</sub>-3A-A at specific external fields.

TPA: a) TPA -1.30 eV

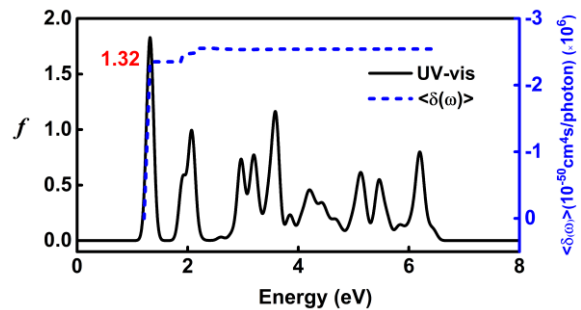

b) TPA -1.35 eV

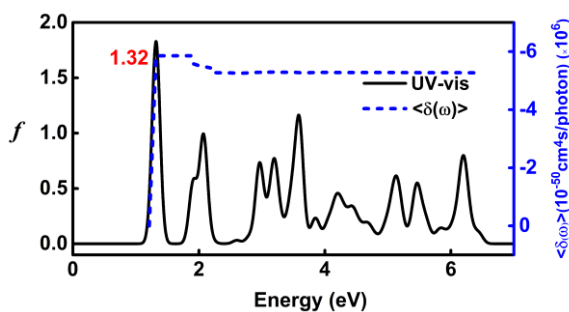

c) TPA -2.05 eV

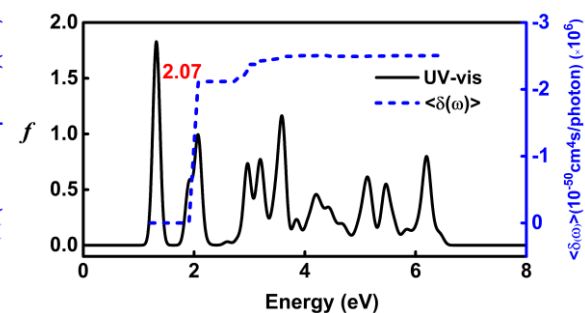

d) TPA -2.10 eV

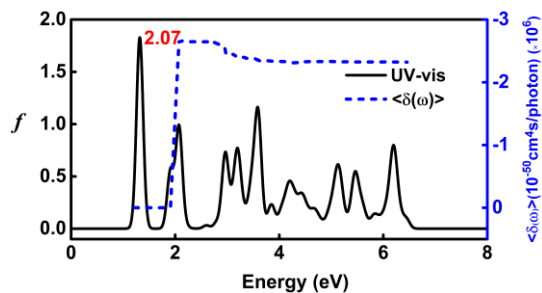

DFWM: a) DFWM -1.16 eV

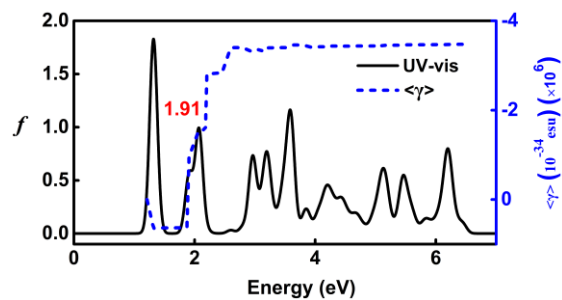

b) DFWM -1.32 eV

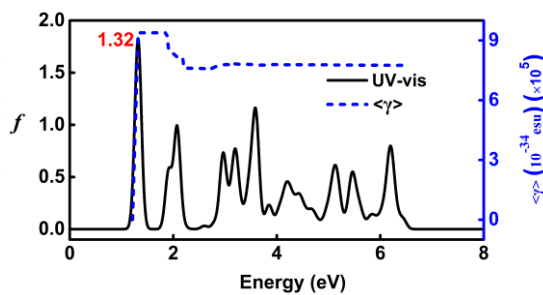

c) DFWM -1.91 eV

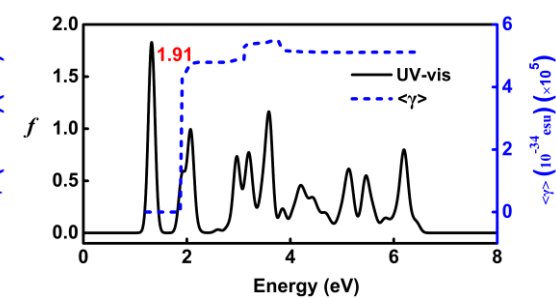

THG: a) THG  $-0.65$  eV

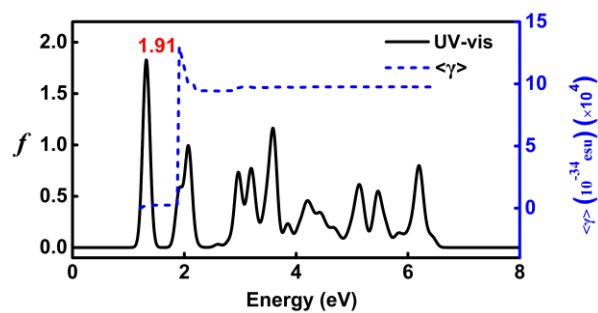

b) THG  $-1.30$  eV

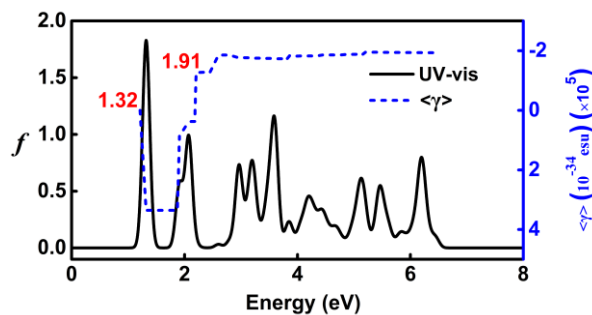

c) THG  $-1.90$  eV

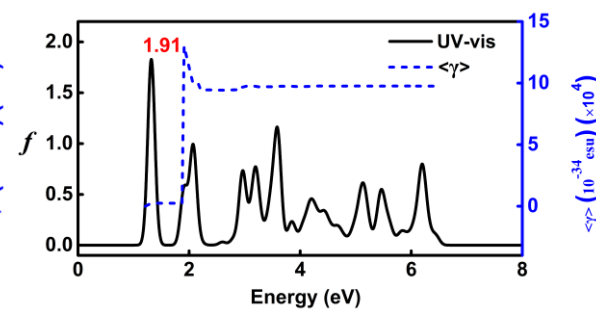

EFISH: a) EFISH  $-0.65$  eV

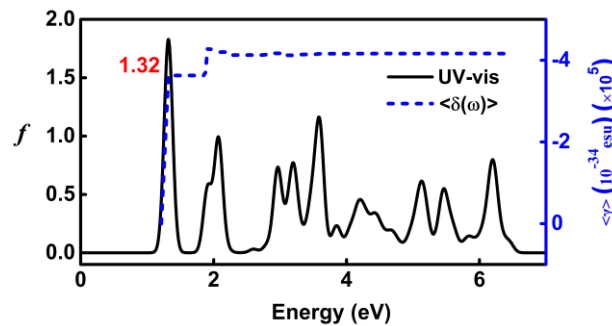

b) EFISH  $-1.35$  eV

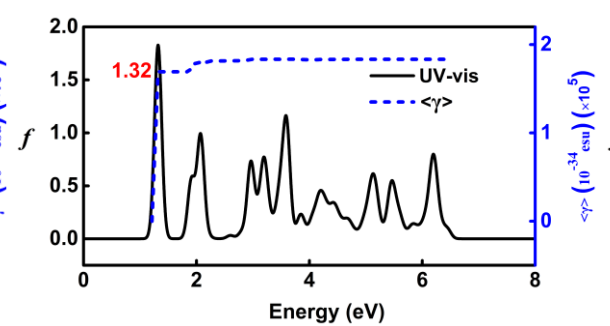

c) EFISH  $-1.90$  eV

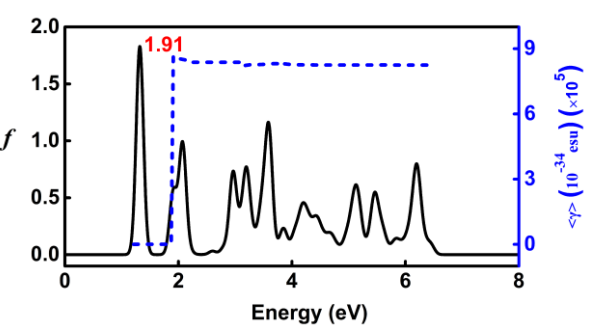

**Figure S8** The evolution of third order nonlinear optic properties with electron excitations of Mg-P<sub>N</sub>-3A-A at specific external fields.

TPA: a) TPA -1.20 eV

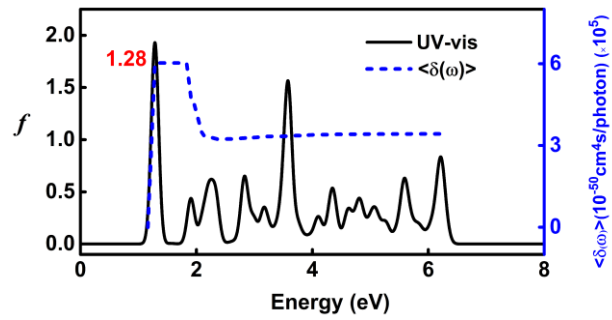

b) TPA -1.35 eV

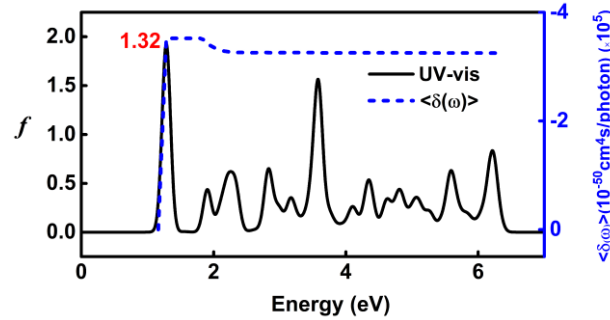

c) TPA -1.90 eV

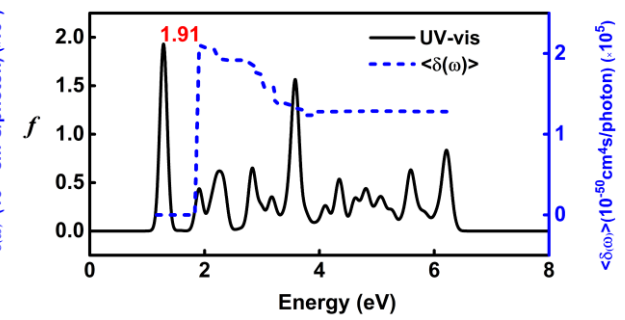

DFWM: a) DFWM -1.25 eV

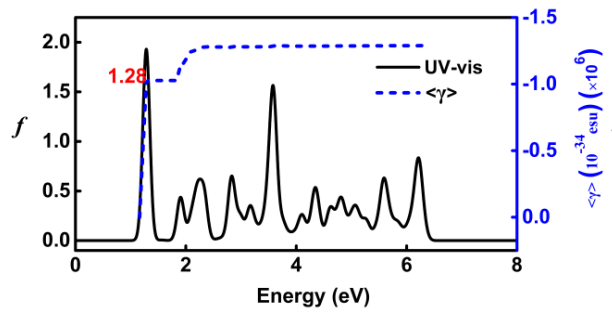

b) DFWM -1.30 eV

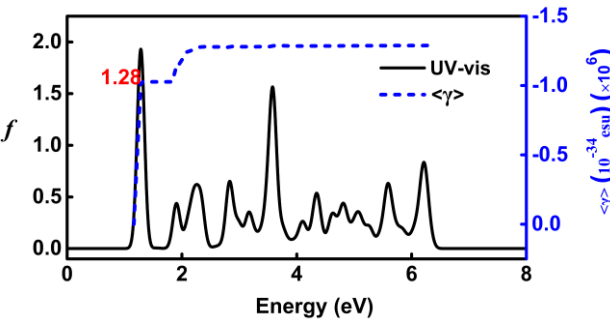

c) DFWM -1.90 eV

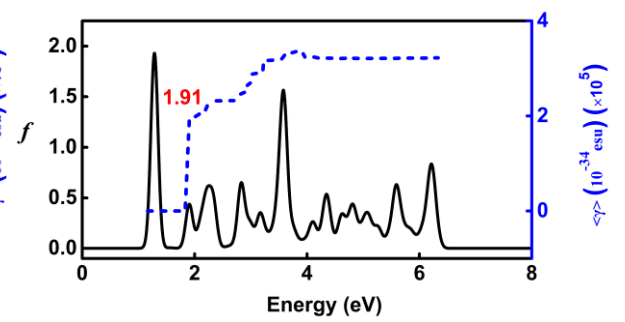

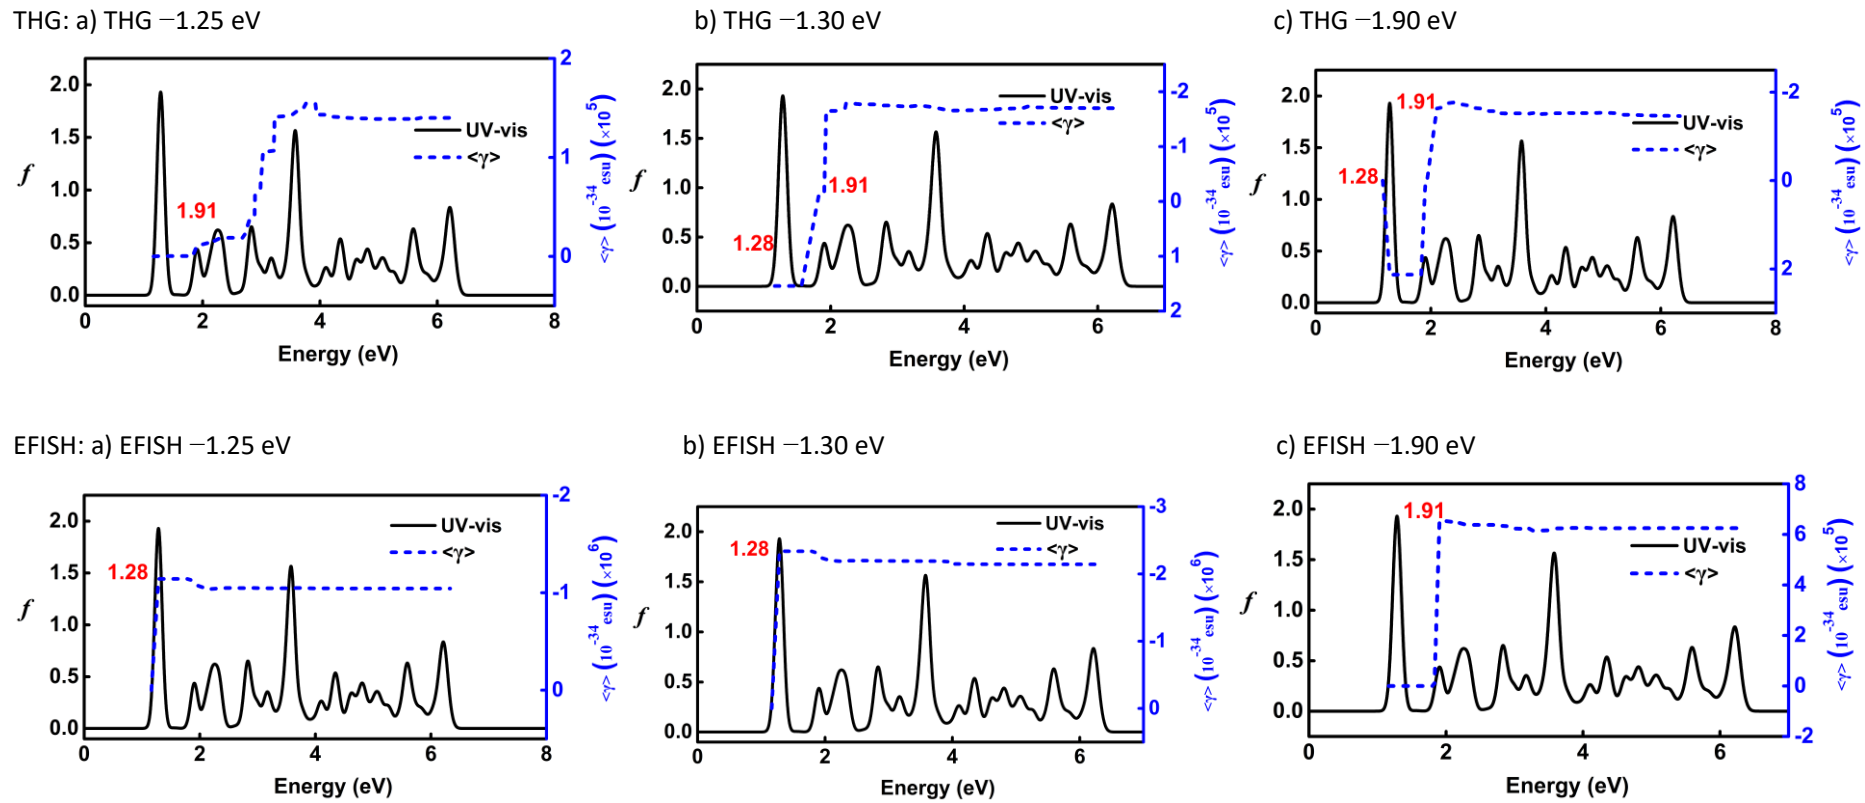

**Figure S9** The evolution of third order nonlinear optic properties with electron excitations for Ni-P<sub>N</sub>-3A-A at specific external fields.

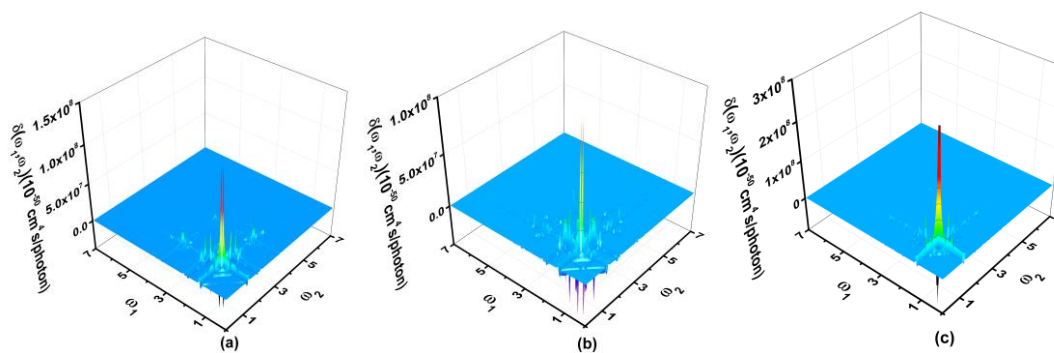

**Figure S10** The two-dimensional two-photon absorption spectra of (a) P<sub>N</sub>-3A-A, (b) Mg-P<sub>N</sub>-3A-A and (c) Ni-P<sub>N</sub>-3A-A scanned up to 7.00 eV with a step size of 0.05 eV.

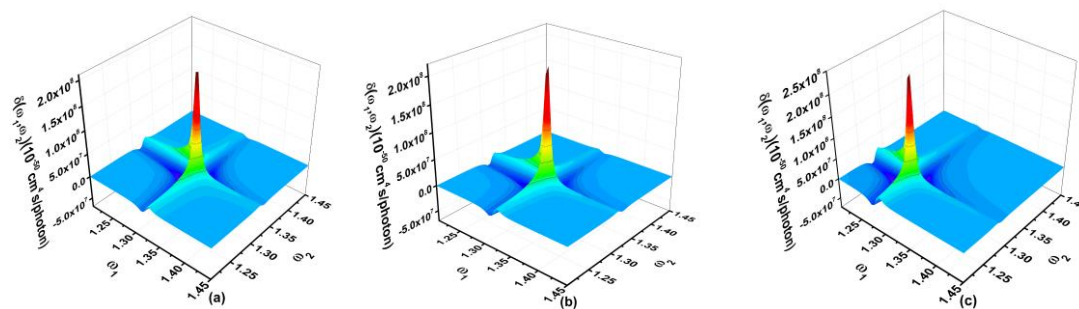

**Figure S11** (a) Fine-scanned TDTA of P<sub>N</sub>-3A-A from 1.20 eV to 1.45 eV; (b) Fine-scanned TDTA of Mg-P<sub>N</sub>-3A-A from 1.15 eV to 1.45 eV; (c) Fine-scanned TDTA of Ni-P<sub>N</sub>-3A-A from 1.20 eV to 1.45 eV.

**Table S1** The lowest vibrational frequency (LVF, in  $\text{cm}^{-1}$ ), energy gap ( $E_{\text{gap}}$ , in eV) between the HOMO ( $E_{\text{H}}$ , in eV) and the LUMO ( $E_{\text{L}}$ , in eV), the static first and second hyperpolarizability ( $\langle\beta_0\rangle$  and  $\langle\gamma_0\rangle$ ), the  $\langle\beta_0\rangle$  (in  $10^{-30}$  esu) and  $\langle\gamma_0\rangle$  (in  $10^{-34}$  esu) per heavy atom ( $\langle\beta_0\rangle/N$  and  $\langle\gamma_0\rangle/N$ ) of porphyrin derivatives series of molecules in closed-shell singlet predicted with B3LYP/6-31G (d, p) and TD-CAM-B3LYP/6-31++G (d, p)-SOS, respectively. The relative electronic energy differences ( $\Delta E_{\text{OS-CS}}$  and  $\Delta E_{\text{T-CS}}$ , in kcal/mol) between open-shell singlet (OS) or triplet (T) and closed-shell singlet (CS) (CS is taken as reference), and spin contamination of open-shell singlet ( $\langle S^2 \rangle_{\text{OS}}$ ) obtained at the UB3LYP/6-31G (d, p) level.

| Compounds                                   | LVF<br>( $\text{cm}^{-1}$ ) | $\Delta E_{\text{OS-CS}}$<br>(Kcal/mol) | $\Delta E_{\text{T-CS}}$<br>(Kcal/mol) | $\langle S^2 \rangle_{\text{OS}}$ | $E_{\text{H}}$<br>(eV) | $E_{\text{L}}$<br>(eV) | $E_{\text{gap}}$<br>(eV) | $D_{\text{g}}/\text{Debye}$ | $\langle\beta_0\rangle/(\langle\beta_0\rangle/N)$<br>( $10^{-30}$ esu) | $\langle\gamma_0\rangle/(\langle\gamma_0\rangle/N)$<br>( $10^{-30}$ esu) | $\langle\gamma_0\rangle_{3\text{L}}/\langle\gamma_0\rangle_{4\text{L}}$<br>( $10^{-34}$ esu) |
|---------------------------------------------|-----------------------------|-----------------------------------------|----------------------------------------|-----------------------------------|------------------------|------------------------|--------------------------|-----------------------------|------------------------------------------------------------------------|--------------------------------------------------------------------------|----------------------------------------------------------------------------------------------|
| P <sub>N</sub> -2A-2A (C <sub>1</sub> )     | 5.27                        | 0.00                                    | 5.31                                   | 0.00                              | -3.46                  | -4.45                  | 0.99                     | 16.00                       | 22935.10/409.56                                                        | -621.19/-11.09                                                           | -268.33/-352.86                                                                              |
| Mg-P <sub>N</sub> -2A-2A (C <sub>5</sub> )  | 6.05                        | 0.00                                    | 21.32                                  | 0.00                              | -3.43                  | -4.41                  | 0.98                     | 15.68                       | 22361.30/392.30                                                        | -573.93/-10.07                                                           | -275.94/-297.99                                                                              |
| Ni-P <sub>N</sub> -2A-2A (C <sub>1</sub> )  | 3.30                        | 0.00                                    | 5.89                                   | 0.00                              | -4.19                  | -3.39                  | 0.80                     | 26.25                       | 17282.10/303.19                                                        | -385.27/-6.76                                                            | -277.50/-107.76                                                                              |
| Zn-P <sub>N</sub> -2A-2A (C <sub>1</sub> )  | 4.39                        | 0.00                                    | 3.12                                   | 0.00                              | -4.17                  | -3.43                  | 0.74                     | 27.71                       | /                                                                      | /                                                                        | /                                                                                            |
| P <sub>N</sub> -3A-2A (C <sub>1</sub> )     | 3.81                        | -0.33                                   | 3.57                                   | 0.02                              | -4.21                  | -3.48                  | 0.73                     | 28.71                       | 59933.80/856.20                                                        | -2449.6/-34.99                                                           | -724.02/-1725.58                                                                             |
| Ni-P <sub>N</sub> -3A-2A (C <sub>1</sub> )  | 3.30                        | 0.00                                    | 3.93                                   | 0.00                              | -4.19                  | -3.39                  | 0.80                     | 26.25                       | 54439.20/766.75                                                        | -1836.7/-25.87                                                           | -855.99/-980.71                                                                              |
| Mg-P <sub>N</sub> -3A-2A (C <sub>5</sub> )  | 4.68                        | -0.04                                   | 3.99                                   | 0.00                              | -4.18                  | -3.44                  | 0.74                     | 28.13                       | 59631.70/839.88                                                        | -2390.07/-33.66                                                          | -764.28/-1625.79                                                                             |
| Zn-P <sub>N</sub> -3A-2A (C <sub>1</sub> )  | 4.39                        | -0.33                                   | 3.57                                   | 0.00                              | -3.43                  | -4.17                  | 0.74                     | 27.71                       | 46932.40/661.02                                                        | -1461.25/-20.58                                                          | -729.87/-731.38                                                                              |
| P <sub>N</sub> -4A-A (C <sub>5</sub> )      | 3.91                        | 0.00                                    | 4.39                                   | 0.00                              | -4.23                  | -3.58                  | 0.65                     | 42.00                       | 69183.40/910.31                                                        | -2222.7/-29.25                                                           | -845.54/-1377.16                                                                             |
| Mg-P <sub>N</sub> -4A-A (C <sub>5</sub> )   | 3.37                        | 0.00                                    | 4.53                                   | 0.00                              | -4.20                  | -3.56                  | 0.64                     | 41.18                       | 70625.70/917.22                                                        | -2328.91/-30.25                                                          | -885.30/-1443.60                                                                             |
| Ni-P <sub>N</sub> -4A-A (C <sub>1</sub> )   | 4.23                        | 0.00                                    | 4.83                                   | 0.00                              | -4.18                  | -3.52                  | 0.66                     | 39.72                       | 71367.60/926.85                                                        | -2401.82/-31.19                                                          | -936.91/-1464.91                                                                             |
| Zn-P <sub>N</sub> -4A-A (C <sub>5</sub> )   | 3.84                        | 0.00                                    | 1.30                                   | 0.00                              | -3.95                  | -3.54                  | 0.41                     | 39.95                       | /                                                                      | /                                                                        | /                                                                                            |
| P <sub>N</sub> -2A-N-2A-N (C <sub>5</sub> ) | 1.96                        | 0.00                                    | 11.52                                  | 0.00                              | -4.54                  | -3.14                  | 1.40                     | 7.57                        | 22935.10/364.05                                                        | -621.19/-9.86                                                            | -268.33/-352.86                                                                              |
| P-A-A-N (C <sub>5</sub> )                   | 14.44                       | 0.00                                    | 28.97                                  | 0.00                              | -2.87                  | -4.47                  | 1.60                     | 2.10                        | -242.95/-7.15                                                          | -1.46/-0.04                                                              | -6.26/4.80                                                                                   |
| P-2A-A-N (C <sub>1</sub> )                  | 9.01                        | 0.00                                    | 10.00                                  | 0.00                              | -2.83                  | -4.20                  | 1.37                     | 4.27                        | -870.39/-18.13                                                         | 6.43/0.13                                                                | -29.80/36.23                                                                                 |

|                                                       |      |      |       |      |       |       |      |       |                 |              |               |
|-------------------------------------------------------|------|------|-------|------|-------|-------|------|-------|-----------------|--------------|---------------|
| P-3A-N (C <sub>2v</sub> )                             | 9.76 | 0.00 | 10.69 | 0.00 | -2.65 | -4.04 | 1.39 | 3.73  | -2302.74/-40.40 | 23.46/0.41   | -54.14/77.60  |
| P-3A-A (C <sub>s</sub> )                              | 6.19 | 0.00 | -4.74 | 0.00 | -3.27 | -3.70 | 0.43 | 21.03 | /               | /            | /             |
| P-3A-A-N(C <sub>2v</sub> )                            | 6.24 | 0.00 | 9.87  | 0.00 | -2.80 | -4.07 | 1.27 | 4.20  | -3439.85/-55.48 | -1.46/-0.02  | -83.84/82.38  |
| P <sub>N</sub> -A-2A (C <sub>1</sub> )                | 8.73 | 0.00 | 5.84  | 0.00 | -4.85 | -3.64 | 1.21 | 2.11  | 4680.12/111.43  | -77.75/-1.85 | -86.90/9.16   |
| P <sub>C<sub>N</sub></sub> -3A-N (C <sub>s</sub> )    | 8.21 | 0.00 | 9.56  | 0.00 | -4.16 | -2.91 | 2.01 | 6.91  | -3338.99/-48.39 | -36.51/-0.53 | -116.61/80.10 |
| Ni-P <sub>C<sub>N</sub></sub> -3A-N (C <sub>s</sub> ) | 8.57 | 0.00 | 16.58 | 0.00 | -4.09 | -2.77 | 1.32 | 5.40  | -2877.10/-41.10 | -37.44/-0.53 | -110.79/73.35 |
| Mg-P <sub>C<sub>N</sub></sub> -3A-N(C <sub>s</sub> )  | 8.50 | 0.00 | 9.48  | 0.00 | -4.10 | -2.80 | 1.30 | 5.78  | -2497.61/-35.68 | -48.68/-0.70 | -118.10/69.42 |
| Zn-P <sub>C<sub>N</sub></sub> -3A-N (C <sub>s</sub> ) | 8.53 | 0.00 | 1.30  | 0.00 | -4.10 | -2.79 | 1.31 | 5.72  | /               | /            | /             |



**Table S2** Major electronic spectra absorption peaks with transition nature in P<sub>N</sub>-3A-A, Mg-P<sub>N</sub>-3A-A and Ni-P<sub>N</sub>-3A-A (*f* is the oscillator strength in arbitrary unit, *E* is the transition energy in eV,  $\lambda$  is the wavelength in nm, TNMC to  $\langle\beta_0\rangle$  is the transition nature of electron excitation with a major contribution to  $\langle\beta_0\rangle$ ,  $\langle\beta_0\rangle_{\text{con}}$  is contribution to  $\langle\beta_0\rangle$  in  $10^{-30}$  esu).

| Compounds               | <i>f</i> | <i>E</i> | $\lambda$ | Transition                     | TNMC to $\langle\beta_0\rangle$ | $\langle\beta_0\rangle_{\text{con}}$ |
|-------------------------|----------|----------|-----------|--------------------------------|---------------------------------|--------------------------------------|
| P <sub>N</sub> -3A-A    | 1.86     | 1.32     | 936.86    | S <sub>0</sub> →S <sub>2</sub> | H-2→L (5.5 %)<br>H→L (88.5 %)   | 22264.13                             |
| Mg-P <sub>N</sub> -3A-A | 1.83     | 1.32     | 940.20    | S <sub>0</sub> →S <sub>2</sub> | H-2→L (5.3%)<br>H→L (88.2%)     | 21620.92                             |
| Ni-P <sub>N</sub> -3A-A | 1.93     | 1.28     | 965.91    | S <sub>0</sub> →S <sub>2</sub> | H-2→L (5.3%)<br>H→L (87.6%)     | 20877.60                             |

**Table S3** Calculated important parameters of  $(\beta_{ijk})_m$  [*i, j, k* ∈ (*x, y, z*)] ( $\times 10^{-30}$  esu) of P<sub>N</sub>-3A-A, Mg-P<sub>N</sub>-3A-A and Ni-P<sub>N</sub>-3A-A. The  $(\beta_{ijk})_m$  is the first hyperpolarizability tensor of the *m*th excited state (*S<sub>m</sub>*) with a major contribution to the static first hyperpolarizability ( $\langle\beta_0\rangle$ ), *m* = 0 is the ground state, and *m* > 0 is the *m*th excited state.

| Structures<br>( $\langle\beta_0\rangle$ ) | $(\beta_{zzz})_m$ | $(\beta_{yyy})_m$ | $(\beta_{xxx})_m$ | <i>S<sub>m</sub></i>                                               | <i>E<sub>m</sub></i> | State dipole moment |        |      |       | Transition dipole moment |      |       |      |       |
|-------------------------------------------|-------------------|-------------------|-------------------|--------------------------------------------------------------------|----------------------|---------------------|--------|------|-------|--------------------------|------|-------|------|-------|
|                                           |                   |                   |                   |                                                                    |                      | X                   | Y      | Z    | tot   | X                        | Y    | Z     | tot  |       |
| P <sub>N</sub> -3A-A<br>(27899.8)         | 0.00              | 22264.7           | 0.00              | S <sub>0</sub><br>S <sub>2</sub> [S <sub>0</sub> →S <sub>2</sub> ] | 1.32                 | -0.24               | 39.16  | 0.00 | 39.16 | 5.58                     | 0.06 | 19.32 | 0.00 | 19.32 |
| Mg-P <sub>N</sub> -3A-A<br>(28606.4)      | 0.00              | -21620.9          | 0.00              | S <sub>0</sub><br>S <sub>2</sub> [S <sub>0</sub> →S <sub>2</sub> ] | 1.32                 | 0.00                | -38.21 | 0.00 | 38.21 | 5.62                     | 0.00 | 19.16 | 0.00 | 19.16 |
| Ni-P <sub>N</sub> -3A-A<br>(26161.6)      | 208776            | 0.00              | 0.00              | S <sub>0</sub><br>S <sub>2</sub> [S <sub>0</sub> →S <sub>2</sub> ] | 1.28                 | 35.85               | 0.00   | 0.00 | 35.85 | 1.02                     | 0.00 | 19.98 | 0.00 | 19.98 |

(1) P<sub>N</sub>-3A-A:

$$\beta_{YYY}[S_0 \rightarrow S_2] = 6 \times \frac{19.32 \times [(-5.54) - 39.16] \times (-19.32)}{1.32^2} \times \frac{(10^{-18})^3}{(1.602 \times 10^{-12})^2} \text{ esu}$$

$$= 22387.21 \times 10^{-30} \text{ esu}$$

(2) Mg-P<sub>N</sub>-3A-A:

$$\beta_{YYY}[S_0 \rightarrow S_2] = 6 \times \frac{19.16 \times [5.62 - (-38.21)] \times (-19.16)}{1.32^2} \times \frac{(10^{-18})^3}{(1.602 \times 10^{-12})^2} \text{ esu}$$

$$= -21589.41 \times 10^{-30} \text{ esu}$$

(3) Ni-P<sub>N</sub>-3A-A:

$$\beta_{YYY}[S_0 \rightarrow S_2] = 6 \times \frac{19.98 \times [1.02 - 35.85] \times (-19.98)}{1.28^2} \times \frac{(10^{-18})^3}{(1.602 \times 10^{-12})^2} \text{esu}$$

$$= 19840.41 \times 10^{-30} \text{esu}$$

**Table S4** Major electron excitations with transition nature in P<sub>N</sub>-3A-A, Mg-P<sub>N</sub>-3A-A and Ni-P<sub>N</sub>-3A-A. *f* is the oscillator strength,  $\lambda$  is the wavelength, and TNMC to  $\langle \gamma_0 \rangle_{3L}$  is the transition nature of electron excitation with a major contribution to  $\langle \gamma_0 \rangle_{3L}$ .

| Compounds               | <i>f</i> | E    | $\lambda$ | Transition                     | TNMC to $\langle \gamma_0 \rangle_{3L}$ | $[\langle \gamma_0 \rangle_{3L}]_{\text{con}}$ | $[\langle \gamma_0 \rangle_{4L}]_{\text{con}}$ |
|-------------------------|----------|------|-----------|--------------------------------|-----------------------------------------|------------------------------------------------|------------------------------------------------|
| P <sub>N</sub> -3A-A    | 1.86     | 1.32 | 936.86    | S <sub>0</sub> →S <sub>2</sub> | H-2→L (5.5 %)<br>H→L (88.5 %)           | -117.23                                        | -625.65                                        |
| Mg-P <sub>N</sub> -3A-A | 1.83     | 1.32 | 940.20    | S <sub>0</sub> →S <sub>2</sub> | H-2→L (5.3%)<br>H→L (88.2%)             | -114.66                                        | -597.68                                        |
| Ni-P <sub>N</sub> -3A-A | 1.93     | 1.28 | 965.91    | S <sub>0</sub> →S <sub>2</sub> | H-2→L (5.3%)<br>H→L (87.6%)             | -146.93                                        | -498.68                                        |

**Table S5** Calculated important parameters of  $(\gamma_{ijk})_m$  ( $\times 10^{-34}$  esu) of P<sub>N</sub>-3A-A, Mg-P<sub>N</sub>-3A-A and Ni-P<sub>N</sub>-3A-A. The  $(\gamma_{ijk})_m$  is the second hyperpolarizability tensor of the *m*th excited state (S<sub>*m*</sub>) with a major contribution to the static first hyperpolarizability ( $\langle \gamma_0 \rangle$ ), *m* = 0 is the ground state, and *m* > 0 is the *m*th excited state. ( $\gamma_{xxxx}$  represents  $\gamma$  along the X direction,  $\gamma_{yyy}$  represents  $\gamma$  along the Y direction)

| Structures<br>( $\langle \gamma_0 \rangle_{3L}$ ) | $(\gamma_{zzzz})_{3Lm}$<br>(Contribution) | S <sub><i>m</i></sub>                            | E <sub><i>m</i></sub> | State dipole moment |        |      |       | Transition dipole moment |       |       |       |  |
|---------------------------------------------------|-------------------------------------------|--------------------------------------------------|-----------------------|---------------------|--------|------|-------|--------------------------|-------|-------|-------|--|
|                                                   |                                           |                                                  |                       | X                   | Y      | Z    | tot   | X                        | Y     | Z     | tot   |  |
| P <sub>N</sub> -3A-A<br>(-269.44)                 |                                           | S <sub>0</sub>                                   |                       | -0.24               | 39.29  | 0.00 | 39.29 |                          |       |       |       |  |
|                                                   |                                           | S <sub>1</sub> [S <sub>0</sub> →S <sub>1</sub> ] | 1.21                  | -0.05               | 8.91   | 0.00 | 8.91  | 0.00                     | 0.00  | -1.25 | 1.25  |  |
|                                                   | -584.30                                   | S <sub>2</sub> [S <sub>0</sub> →S <sub>2</sub> ] | 1.32                  | -0.64               | -5.54  | 0.00 | 5.57  | 0.06                     | 19.32 | 0.00  | 19.32 |  |
| Mg-P <sub>N</sub> -3A-A<br>(-284.46)              |                                           | S <sub>0</sub>                                   |                       | 0.00                | -38.21 | 0.00 | 38.21 |                          |       |       |       |  |
|                                                   |                                           | S <sub>1</sub> [S <sub>0</sub> →S <sub>1</sub> ] | 1.21                  | 0.00                | -8.32  | 0.00 | 8.32  | 0.00                     | 0.00  | -1.29 | 1.29  |  |
|                                                   | -571.32                                   | S <sub>2</sub> [S <sub>0</sub> →S <sub>2</sub> ] | 1.32                  | 0.00                | 5.62   | 0.00 | 5.62  | 0.00                     | 19.16 | 0.00  | 19.16 |  |
| Ni-P <sub>N</sub> -3A-A<br>(-323.30)              |                                           | S <sub>0</sub>                                   |                       | 35.85               | 0.00   | 0.00 | 35.85 |                          |       |       |       |  |
|                                                   |                                           | S <sub>1</sub> [S <sub>0</sub> →S <sub>1</sub> ] | 1.16                  | 6.21                | 0.00   | 0.00 | 6.21  | 0.00                     | 1.13  | 0.17  | 1.14  |  |
|                                                   | -732.80                                   | S <sub>2</sub> [S <sub>0</sub> →S <sub>2</sub> ] | 1.28                  | -1.02               | 0.00   | 0.00 | 1.02  | 19.98                    | 0.00  | 0.00  | 19.98 |  |

1. P<sub>N</sub>-3A-A:

(1) S<sub>0</sub>→S<sub>2</sub>:

S<sub>0</sub>→S<sub>1</sub>→S<sub>0</sub>→S<sub>2</sub>→S<sub>0</sub>; S<sub>0</sub>→S<sub>2</sub>→S<sub>0</sub>→S<sub>1</sub>→S<sub>0</sub>; S<sub>0</sub>→S<sub>2</sub>→S<sub>0</sub>→S<sub>2</sub>→S<sub>0</sub>

$$\begin{aligned}
\mathcal{Y}_{3L(YYYY)(Contribution)}[S_0 \rightarrow S_2] &\approx -\frac{24 r_{01}^Y r_{10}^Y r_{02}^Y r_{20}^Y}{6 E_1 E_2^2} - \frac{24 r_{02}^Y r_{20}^Y r_{01}^Y r_{10}^Y}{6 E_2 E_1^2} - \frac{24 r_{02}^Y r_{20}^Y r_{02}^Y r_{20}^Y}{6 E_2^3} \\
&= \left[ -4 \times \frac{0 \times 0 \times (19.32) \times (-19.32)}{1.21 \times 1.32^2} - 4 \times \frac{(19.32) \times (-19.32) \times 0 \times 0}{1.32 \times 1.21^2} - 4 \right. \\
&\quad \left. \times \frac{(19.32) \times (-19.32) \times (19.32) \times (-19.32)}{1.32^3} \right] \times \frac{(10^{-18})^4}{(1.602 \times 10^{-12})^3} \\
&= -589.35 \times 10^{-34}
\end{aligned}$$

2. Mg-P<sub>N</sub>-3A-A:

(2) S<sub>0</sub>→S<sub>2</sub>:

S<sub>0</sub>→S<sub>1</sub>→S<sub>0</sub>→S<sub>2</sub>→S<sub>0</sub>; S<sub>0</sub>→S<sub>2</sub>→S<sub>0</sub>→S<sub>1</sub>→S<sub>0</sub>; S<sub>0</sub>→S<sub>2</sub>→S<sub>0</sub>→S<sub>2</sub>→S<sub>0</sub>

$$\begin{aligned}
\mathcal{Y}_{3L(xxxx)(Contribution)}[S_0 \rightarrow S_2] &\approx -\frac{24 r_{01}^x r_{10}^x r_{02}^x r_{20}^x}{6 E_1 E_2^2} - \frac{24 r_{02}^x r_{20}^x r_{01}^x r_{10}^x}{6 E_2 E_1^2} - \frac{24 r_{02}^x r_{20}^x r_{02}^x r_{20}^x}{6 E_2^3} \\
&= \left[ -4 \times \frac{0 \times 0 \times (19.16) \times (-19.16)}{1.21 \times 1.32^2} - 4 \times \frac{(19.16) \times (-19.16) \times 0 \times 0}{1.32 \times 1.21^2} - 4 \right. \\
&\quad \left. \times \frac{(19.16) \times (-19.16) \times (19.16) \times (-19.16)}{1.32^3} \right] \times \frac{(10^{-18})^4}{(1.602 \times 10^{-12})^3} \\
&= -570.07 \times 10^{-34}
\end{aligned}$$

3. Ni-P<sub>N</sub>-3A-A:

(3) S<sub>0</sub>→S<sub>2</sub>:

S<sub>0</sub>→S<sub>1</sub>→S<sub>0</sub>→S<sub>2</sub>→S<sub>0</sub>; S<sub>0</sub>→S<sub>2</sub>→S<sub>0</sub>→S<sub>1</sub>→S<sub>0</sub>; S<sub>0</sub>→S<sub>2</sub>→S<sub>0</sub>→S<sub>2</sub>→S<sub>0</sub>

$$\begin{aligned}
\mathcal{Y}_{3L(YYYY)(Contribution)}[S_0 \rightarrow S_2] &\approx -\frac{24 r_{01}^Y r_{10}^Y r_{02}^Y r_{20}^Y}{6 E_1 E_2^2} - \frac{24 r_{02}^Y r_{20}^Y r_{01}^Y r_{10}^Y}{6 E_2 E_1^2} - \frac{24 r_{02}^Y r_{20}^Y r_{02}^Y r_{20}^Y}{6 E_2^3} \\
&= \left[ -4 \times \frac{0 \times 0 \times (19.98) \times (-19.98)}{1.16 \times 1.28^2} - 4 \times \frac{(19.98) \times (-19.98) \times 0 \times 0}{1.28 \times 1.16^2} - 4 \right. \\
&\quad \left. \times \frac{(19.98) \times (-19.98) \times (19.98) \times (-19.98)}{1.28^3} \right] \times \frac{(10^{-18})^4}{(1.602 \times 10^{-12})^3} \\
&= -739.30 \times 10^{-34}
\end{aligned}$$

**Table S6** Important parameters of  $(\gamma_{ijk})_m (\times 10^{-34}$  esu) of P<sub>N</sub>-3A-A, Mg-P<sub>N</sub>-3A-A and Ni-P<sub>N</sub>-3A-A. The  $(\gamma_{ijk})_m$  is the second hyperpolarizability tensor of the mth excited state ( $S_m$ ) with a major contribution to the static first hyperpolarizability ( $\langle \gamma_0 \rangle$ ),  $m = 0$  is the ground state, and  $m > 0$  is the mth excited state. ( $\gamma_{xxxx}$  represents  $\gamma$  along the X direction,  $\gamma_{yyyy}$  represents  $\gamma$  along the Y direction)

| Structures<br>( $\langle \gamma_0 \rangle_{4L}$ ) | $(\gamma_{YYYY/XXXX})_{4Lm}$<br>(Contribution) | $S_m$                       | $E_m$ | State dipole moment |        |       |       | Transition dipole moment |       |       |       |  |  |
|---------------------------------------------------|------------------------------------------------|-----------------------------|-------|---------------------|--------|-------|-------|--------------------------|-------|-------|-------|--|--|
|                                                   |                                                |                             |       | X                   | Y      | Z     | tot   | X                        | Y     | Z     | tot   |  |  |
| P <sub>N</sub> -3A-A<br>(-699.65)                 |                                                | $S_0$                       |       | -0.24               | 39.29  | 0.00  | 39.29 |                          |       |       |       |  |  |
|                                                   |                                                | $S_1 [S_0 \rightarrow S_1]$ | 1.21  | -0.05               | 8.91   | 0.00  | 8.91  | 0.00                     | 0.00  | -1.25 | 1.25  |  |  |
|                                                   |                                                | $S_1 \rightarrow S_2$       |       | 0.00                | 0.00   | 1.33  | 1.33  |                          |       |       |       |  |  |
|                                                   | -3129.03                                       | $S_2 [S_0 \rightarrow S_2]$ | 1.32  | -0.64               | -5.54  | 0.00  | 5.57  | 0.06                     | 19.32 | 0.00  | 19.32 |  |  |
| Mg-P <sub>N</sub> -3A-A<br>(-716.40)              |                                                | $S_0$                       |       | 0.00                | -38.21 | 0.00  | 38.21 |                          |       |       |       |  |  |
|                                                   |                                                | $S_1 [S_0 \rightarrow S_1]$ | 1.21  | 0.00                | -8.32  | 0.00  | 8.32  | 0.00                     | 0.00  | -1.29 | 1.29  |  |  |
|                                                   |                                                | $S_1 \rightarrow S_2$       |       | 0.00                | 0.00   | -1.29 | 1.29  |                          |       |       |       |  |  |
|                                                   | -2989.35                                       | $S_2 [S_0 \rightarrow S_2]$ | 1.32  | 0.00                | 5.62   | 0.00  | 5.62  | 0.00                     | 19.16 | 0.00  | 19.16 |  |  |
| Ni-P <sub>N</sub> -3A-A<br>(-592.60)              |                                                | $S_0$                       |       | 35.85               | 0.00   | 0.00  | 35.85 |                          |       |       |       |  |  |
|                                                   |                                                | $S_1 [S_0 \rightarrow S_1]$ | 1.16  | 6.21                | 0.00   | 0.00  | 6.21  | 0.00                     | 1.13  | 0.17  | 1.14  |  |  |
|                                                   |                                                | $S_1 \rightarrow S_2$       |       | 0.00                | -1.26  | 0.19  |       |                          |       |       |       |  |  |
|                                                   | -2494.51                                       | $S_2 [S_0 \rightarrow S_2]$ | 1.28  | -1.02               | 0.00   | 0.00  | 1.02  | 19.98                    | 0.00  | 0.00  | 19.98 |  |  |

### 1. P<sub>N</sub>-3A-A:

#### (1) $S_0 \rightarrow S_2$ :

$S_0 \rightarrow S_2 \rightarrow S_2 \rightarrow S_2 \rightarrow S_0$  ;  $S_0 \rightarrow S_1 \rightarrow S_2 \rightarrow S_2 \rightarrow S_0$  ;  $S_0 \rightarrow S_2 \rightarrow S_1 \rightarrow S_2 \rightarrow S_0$  ;  $S_0 \rightarrow S_2 \rightarrow S_2 \rightarrow S_1 \rightarrow S_0$  ;  $S_0 \rightarrow S_1 \rightarrow S_1 \rightarrow S_2 \rightarrow S_0$  ;  $S_0 \rightarrow S_1 \rightarrow S_2 \rightarrow S_1 \rightarrow S_0$  ;  $S_0 \rightarrow S_2 \rightarrow S_1 \rightarrow S_1 \rightarrow S_0$

$$\begin{aligned} \gamma_{4L}(YYYY)(Contribution)[S_0 \rightarrow S_2] \approx & \frac{24}{6} \frac{r_{02}^Y (r_{22}^Y - r_{00}^Y) (r_{22}^Y - r_{00}^Y) r_{20}^Y}{E_2^3} + \frac{24}{6} \frac{r_{01}^Y r_{12}^Y (r_{22}^Y - r_{00}^Y) r_{20}^Y}{E_1 E_2^2} + \\ & \frac{24}{6} \frac{r_{02}^Y r_{21}^Y r_{12}^Y r_{20}^Y}{E_2 E_1 E_2} + \frac{24}{6} \frac{r_{02}^Y (r_{22}^Y - r_{00}^Y) r_{21}^Y r_{10}^Y}{E_2^2 E_1} + \frac{24}{6} \frac{r_{01}^Y (r_{11}^Y - r_{00}^Y) r_{12}^Y r_{20}^Y}{E_1^2 E_2} + \frac{24}{6} \frac{r_{01}^Y r_{12}^Y r_{21}^Y r_{10}^Y}{E_1 E_2 E_1} + \\ & \frac{24}{6} \frac{r_{02}^Y r_{21}^Y (r_{11}^Y - r_{00}^Y) r_{10}^Y}{E_2 E_1^2} \end{aligned}$$

$$\begin{aligned}
&= \left[ 4 \times \frac{(19.32) \times (-5.54 - 39.29) \times (-5.54 - 39.29) \times (-19.32)}{1.32^3} + 4 \right. \\
&\quad \times \frac{0 \times 0 \times (-5.54 - 39.29) \times (-19.32)}{1.21 \times 1.32^2} + 4 \times \frac{(19.32) \times 0 \times 0 \times (-19.32)}{1.32 \times 1.21 \times 1.32} + 4 \\
&\quad \times \frac{(19.32) \times (-5.54 - 39.29) \times 0 \times 0}{1.32^2 \times 1.21} + 4 \times \frac{0 \times (8.91 - 39.29) \times 0 \times (-19.32)}{1.21^2 \times 1.32} \\
&\quad \left. + 4 \times \frac{0 \times 0 \times 0 \times 0}{1.21 \times 1.32 \times 1.21} + 4 \times \frac{(19.32) \times 0 \times (8.91 - 39.29) \times 0}{1.21 \times 1.32^2} \right] \\
&\quad \times \frac{(10^{-18})^4}{(1.602 \times 10^{-12})^3} = -3461.71 \times 10^{-34}
\end{aligned}$$

2. Mg-P<sub>N</sub>-3A-A:

(1) S<sub>0</sub> → S<sub>2</sub> :

S<sub>0</sub> → S<sub>2</sub> → S<sub>2</sub> → S<sub>2</sub> → S<sub>0</sub> ; S<sub>0</sub> → S<sub>1</sub> → S<sub>2</sub> → S<sub>2</sub> → S<sub>0</sub> ; S<sub>0</sub> → S<sub>2</sub> → S<sub>1</sub> → S<sub>2</sub> → S<sub>0</sub> ; S<sub>0</sub> → S<sub>2</sub> → S<sub>2</sub> → S<sub>1</sub> → S<sub>0</sub> ; S<sub>0</sub> → S<sub>1</sub> → S<sub>1</sub> → S<sub>2</sub> → S<sub>0</sub> ; S<sub>0</sub> → S<sub>1</sub> → S<sub>2</sub> → S<sub>1</sub> → S<sub>0</sub> ; S<sub>0</sub> → S<sub>2</sub> → S<sub>1</sub> → S<sub>1</sub> → S<sub>0</sub>

$$\begin{aligned}
Y_{4L}(YYYY)(Contribution)[S_0 \rightarrow S_2] &\approx \frac{24 r_{02}^Y (r_{22}^Y - r_{00}^Y) (r_{22}^Y - r_{00}^Y) r_{20}^Y}{6 E_2^3} + \frac{24 r_{01}^Y r_{12}^Y (r_{22}^Y - r_{00}^Y) r_{20}^Y}{6 E_1 E_2^2} + \\
&\frac{24 r_{02}^Y r_{21}^Y r_{12}^Y r_{20}^Y}{6 E_2 E_1 E_2} + \frac{24 r_{02}^Y (r_{22}^Y - r_{00}^Y) r_{21}^Y r_{10}^Y}{6 E_2^2 E_1} + \frac{24 r_{01}^Y (r_{11}^Y - r_{00}^Y) r_{12}^Y r_{20}^Y}{6 E_1^2 E_2} + \frac{24 r_{01}^Y r_{12}^Y r_{21}^Y r_{10}^Y}{6 E_1 E_2 E_1} + \\
&\frac{24 r_{02}^Y r_{21}^Y (r_{11}^Y - r_{00}^Y) r_{10}^Y}{6 E_2 E_1^2}
\end{aligned}$$

$$\begin{aligned}
&= \left[ 4 \times \frac{(19.16) \times (5.62 + 38.21) \times (5.62 + 38.21) \times (-19.16)}{1.32^3} + 4 \right. \\
&\quad \times \frac{0 \times 0 \times (5.62 + 38.21) \times (-19.16)}{1.21 \times 1.32^2} + 4 \times \frac{(19.16) \times 0 \times 0 \times (-19.16)}{1.32 \times 1.21 \times 1.32} + 4 \\
&\quad \times \frac{(19.16) \times (5.62 + 38.21) \times 0 \times 0}{1.32^2 \times 1.21} + 4 \times \frac{0 \times (-8.32 + 38.21) \times 0 \times (-19.16)}{1.21^2 \times 1.32} \\
&\quad \left. + 4 \times \frac{0 \times 0 \times 0 \times 0}{1.21 \times 1.32 \times 1.21} + 4 \times \frac{(19.16) \times 0 \times (-8.32 + 38.21) \times 0}{1.21 \times 1.32^2} \right] \\
&\quad \times \frac{(10^{-18})^4}{(1.602 \times 10^{-12})^3} = -2983.21 \times 10^{-34}
\end{aligned}$$

3. Ni-P<sub>N</sub>-3A-A:

(1) S<sub>0</sub> → S<sub>2</sub> :

S<sub>0</sub> → S<sub>2</sub> → S<sub>2</sub> → S<sub>2</sub> → S<sub>0</sub> ; S<sub>0</sub> → S<sub>1</sub> → S<sub>2</sub> → S<sub>2</sub> → S<sub>0</sub> ; S<sub>0</sub> → S<sub>2</sub> → S<sub>1</sub> → S<sub>2</sub> → S<sub>0</sub> ; S<sub>0</sub> → S<sub>2</sub> → S<sub>2</sub> → S<sub>1</sub> → S<sub>0</sub> ; S<sub>0</sub> → S<sub>1</sub> → S<sub>1</sub> → S<sub>2</sub> → S<sub>0</sub> ; S<sub>0</sub> → S<sub>1</sub> → S<sub>2</sub> → S<sub>1</sub> → S<sub>0</sub> ; S<sub>0</sub> → S<sub>2</sub> → S<sub>1</sub> → S<sub>1</sub> → S<sub>0</sub>

$$\begin{aligned}
\mathcal{V}_{4L}(xxxx)(\text{Contribution})[S_0 \rightarrow S_2] &\approx \frac{24 r_{02}^x (r_{22}^x - r_{00}^x) (r_{22}^x - r_{00}^x) r_{20}^x}{6 E_2^3} + \frac{24 r_{01}^x r_{12}^x (r_{22}^x - r_{00}^x) r_{20}^x}{6 E_1 E_2^2} + \\
&\frac{24 r_{02}^x r_{21}^x r_{12}^x r_{20}^x}{6 E_2 E_1 E_2} + \frac{24 r_{02}^x (r_{22}^x - r_{00}^x) r_{21}^x r_{10}^x}{6 E_2^2 E_1} + \frac{24 r_{01}^x (r_{11}^x - r_{00}^x) r_{12}^x r_{20}^x}{6 E_1^2 E_2} + \frac{24 r_{01}^x r_{12}^x r_{21}^x r_{10}^x}{6 E_1 E_2 E_1} + \\
&\frac{24 r_{02}^x r_{21}^x (r_{11}^x - r_{00}^x) r_{10}^x}{6 E_2 E_1^2} \\
&= \left[ 4 \times \frac{(19.98) \times (-1.02 - 35.85) \times (-1.02 - 35.85) \times (-19.98)}{1.28^3} + 4 \right. \\
&\quad \times \frac{0 \times 0 \times (-1.02 - 35.85) \times (-19.98)}{1.16 \times 1.28^2} + 4 \times \frac{(19.98) \times 0 \times 0 \times (-19.98)}{1.28 \times 1.16 \times 1.28} + 4 \\
&\quad \times \frac{(19.98) \times (-1.02 - 35.85) \times 0 \times 0}{1.28^2 \times 1.16} + 4 \times \frac{0 \times (6.21 - 35.85) \times 0 \times (-19.98)}{1.16^2 \times 1.28} \\
&\quad \left. + 4 \times \frac{0 \times 0 \times 0 \times 0}{1.16 \times 1.28 \times 1.16} + 4 \times \frac{(19.98) \times 0 \times (6.21 - 19.98) \times 0}{1.16 \times 1.28^2} \right] \\
&\times \frac{(10^{-18})^4}{(1.602 \times 10^{-12})^3} = -2517.55 \times 10^{-34}
\end{aligned}$$

**Table S7** The strong response and corresponding major electronic excitation contribution of the dynamic third order nonlinear optic process for P<sub>N</sub>-3A-A. TPA is in 10<sup>-50</sup> cm<sup>4</sup>·s/photon. DFWM, THG and EFISH are in 10<sup>-34</sup> esu.

| processes                               | External Field/eV ( $\lambda$ /nm) | Responses | Major Electronic Excitation Contribution |
|-----------------------------------------|------------------------------------|-----------|------------------------------------------|
| TPA                                     | 1.30 (953.85)                      | -15037900 | 1.32 eV(939.39nm)(-13810599.41)          |
| $\delta(-\omega;\omega,-\omega,\omega)$ | 1.35 (918.52)                      | -9163540  | 1.32 eV(939.39nm)(-10119000.16)          |
|                                         | 1.90 (652.63)                      | -2145170  | 1.91 eV(649.21nm)(-1060896.50)           |
| DFWM                                    | 1.30 (953.85)                      | -1349860  | 1.32 eV(939.39nm)(-1014568.54)           |
| $\gamma(-\omega;\omega,-\omega,\omega)$ | 1.35 (10888.43)                    | 860869    | 1.32 eV(939.39nm)(1075601.32)            |
|                                         | 1.90 (652.63)                      | 292359    | 1.91 eV(649.21nm)(305851.60)             |
| THG                                     | 0.45 (2755.56)                     | 51364     | 1.91 eV(423.21nm)(-52446.08)             |
| $\gamma(-3\omega;\omega,\omega,\omega)$ | 0.65 (1907.69)                     | 118959    | 1.91 eV(423.21nm)(137033.04)             |
|                                         | 1.30 (953.85)                      | 97985     | 1.32 eV(939.39nm)(324431.96)             |
| EFISH                                   | 1.30 (953.85)                      | -1603710  | 1.32 eV(939.39nm)(-1763147.71)           |
| $\gamma(-2\omega;\omega,\omega,0)$      | 1.35 (918.52)                      | 2156870   | 1.32 eV(939.39nm)(1990442.93)            |
|                                         | 2.10 (590.48)                      | -1888000  | 2.08 eV(596.15nm)(-1869219.45)           |

**Table S8** The strong response and corresponding major electronic excitation contribution of the dynamic third order nonlinear optic process of Mg-P<sub>N</sub>-3A-A. TPA is in 10<sup>-50</sup> cm<sup>4</sup>·s/photon. DFWM, THG and EFISH are in 10<sup>-34</sup> esu.

| processes                                       | External Field/eV ( $\lambda$ /nm) | Responses | Major Electronic Excitation Contribution                   |
|-------------------------------------------------|------------------------------------|-----------|------------------------------------------------------------|
| TPA<br>$\delta(-\omega;\omega,-\omega,\omega)$  | 1.30 (953.85)                      | -25322800 | 1.32 eV(939.39nm)(-23495799.11)                            |
|                                                 | 1.35 (918.52)                      | -5289810  | 1.32 eV(939.39nm)(-5856190.13)                             |
|                                                 | 2.05 (604.88)                      | -2498190  | 2.07 eV(599.03nm)(-2098402.67)                             |
|                                                 | 2.10 (590.48)                      | -2331620  | 2.07 eV(599.03nm)(-2656904.34)                             |
| DFWM<br>$\gamma(-\omega;\omega,-\omega,\omega)$ | 1.25 (992)                         | -251232   | 1.16 eV(1068.96nm)(627263.91); 2.37 eV(523.21nm)(-60384)   |
|                                                 | 1.30 (953.85)                      | -362301   | 1.32 eV(939.39nm)(-159569)                                 |
|                                                 | 1.35 (918.52)                      | 776070    | 1.32 eV(939.39nm)(938665.35)                               |
|                                                 | 1.90 (652.63)                      | 509618    | 1.91 eV(649.21nm)(425608.94)                               |
| THG<br>$\gamma(-3\omega;\omega,\omega,\omega)$  | 0.65 (1907.69)                     | 97555     | 1.91 eV(649.21nm)(127610.73)                               |
|                                                 | 1.30 (953.85)                      | -192831   | 1.32 eV(939.39nm)(335485.88);1.91 eV(649.21nm)(-248625.70) |
|                                                 | 1.90 (652.63)                      | 73248     | 1.91 eV(649.21nm)(11934.64);3.11 eV(398.71nm)(69333.80)    |
| EFISH<br>$\gamma(-2\omega;\omega,\omega,0)$     | 0.65 (1907.69)                     | -416333   | 1.32 eV(939.39nm)(-362659.71)                              |
|                                                 | 1.35 (918.52)                      | 1835940   | 1.32 eV(939.39nm)(1692150.85)                              |
|                                                 | 1.90 (652.63)                      | 821549    | 1.91 eV(649.21nm)(866985.02)                               |



**Table S9** The strong response and corresponding major electronic excitation contribution of the dynamic third order nonlinear optic process of Ni-P<sub>N</sub>-3A-A. TPA is in 10<sup>-50</sup> cm<sup>4</sup>·s/photon. DFWM, THG and EFISH are in 10<sup>-34</sup> esu.

| processes                                       | External Field/eV ( $\lambda$ /nm) | Responses | Major Electronic Excitation Contribution                   |
|-------------------------------------------------|------------------------------------|-----------|------------------------------------------------------------|
| TPA<br>$\delta(-\omega;\omega,-\omega,\omega)$  | 1.25 (992.00)                      | -5370200  | 1.28 eV(968.75nm)(602881.30)                               |
|                                                 | 1.30 (953.85)                      | -32617600 | 1.28 eV(968.75nm)(-35208200.18)                            |
|                                                 | 1.90 (652.63)                      | -1254690  | 1.91 eV(649.21nm)(2095888.10)                              |
| DFWM<br>$\gamma(-\omega;\omega,-\omega,\omega)$ | 1.25 (992.00)                      | -1287140  | 1.28 eV(968.75nm)(-1026638.51)                             |
|                                                 | 1.30 (953.85)                      | -2389890  | 1.28 eV(968.75nm)(-2099328.77)                             |
|                                                 | 1.90 (652.63)                      | 322944    | 1.91 eV(649.21nm)(192594.05)                               |
| THG<br>$\gamma(-3\omega;\omega,\omega,\omega)$  | 1.25 (992.00)                      | -169773   | 1.28 eV(968.75nm)(154323.64);1.91 eV(649.21nm)(-171166.6)  |
|                                                 | 1.30 (953.85)                      | -145642   | 1.28 eV(968.75nm)(212962.42);1.91 eV(649.21nm)(-210234.57) |
|                                                 | 1.90 (652.63)                      | 139193    | 1.91 eV(649.21nm)(10855.48)                                |
| EFISH<br>$\gamma(-2\omega;\omega,\omega,0)$     | 1.25 (992.00)                      | -1041750  | 1.28 eV(968.75nm)(-1142327.49)                             |
|                                                 | 1.30 (953.85)                      | -2185260  | 1.28 eV(968.75nm)(-2338033.40)                             |
|                                                 | 1.90 (652.63)                      | 627103    | 1.91 eV(649.21nm)(654806.96)                               |

Cartesian coordinates of all structures optimized with b3lyp/6-31G(d,p)

| P |   |           |           | Pc |   |           |           |
|---|---|-----------|-----------|----|---|-----------|-----------|
| C | 0 | 4.148037  | 0.675857  | N  | 0 | 0         | 2.026254  |
| C | 0 | 4.148037  | -0.675857 | N  | 0 | 1.948458  | 0         |
| C | 0 | 2.737322  | 1.083406  | N  | 0 | 0         | -2.026254 |
| C | 0 | -0.683169 | 4.151174  | N  | 0 | -1.948458 | 0         |
| C | 0 | 0.683169  | 4.151174  | C  | 0 | -1.145443 | 2.791776  |
| C | 0 | 1.130312  | 2.775405  | C  | 0 | -0.706787 | 4.176474  |
| C | 0 | -4.148037 | -0.675857 | C  | 0 | 0.706787  | 4.176474  |
| C | 0 | -4.148037 | 0.675857  | C  | 0 | 1.145443  | 2.791776  |
| C | 0 | -2.737322 | -1.083406 | C  | 0 | 2.760998  | 1.097306  |
| C | 0 | -2.737322 | 1.083406  | C  | 0 | 4.173748  | 0.70203   |
| C | 0 | -0.683169 | -4.151174 | C  | 0 | 4.173748  | -0.70203  |
| C | 0 | 0.683169  | -4.151174 | C  | 0 | 2.760998  | -1.097306 |
| C | 0 | -1.130312 | -2.775405 | C  | 0 | 1.145443  | -2.791776 |
| C | 0 | 1.130312  | -2.775405 | C  | 0 | 0.706787  | -4.176474 |
| C | 0 | 2.737322  | -1.083406 | C  | 0 | -0.706787 | -4.176474 |
| C | 0 | -1.130312 | 2.775405  | C  | 0 | -1.145443 | -2.791776 |
| N | 0 | 0         | 1.995603  | C  | 0 | -2.760998 | -1.097306 |
| N | 0 | 1.909874  | 0         | C  | 0 | -4.173748 | -0.70203  |
| N | 0 | -1.909874 | 0         | C  | 0 | -4.173748 | 0.70203   |
| H | 0 | 0         | 0.983696  | C  | 0 | -2.760998 | 1.097306  |
| H | 0 | 0         | -0.983696 | H  | 0 | 0         | 1.013059  |
| N | 0 | 2.39197   | 2.375544  | N  | 0 | 2.39828   | 2.383138  |
| N | 0 | 2.39197   | -2.375544 | N  | 0 | 2.39828   | -2.383138 |
| N | 0 | -2.39197  | -2.375544 | N  | 0 | -2.39828  | 2.383138  |
| N | 0 | -2.39197  | 2.375544  | N  | 0 | -2.39828  | -2.383138 |
| H | 0 | -4.978805 | 1.367351  | H  | 0 | 0         | -1.013059 |
| H | 0 | -4.978805 | -1.367351 | C  | 0 | 5.364184  | -1.424898 |
| H | 0 | -1.359832 | 4.993234  | C  | 0 | 6.55958   | -0.702557 |
| H | 0 | 1.359832  | 4.993234  | C  | 0 | 6.55958   | 0.702557  |
| H | 0 | 4.978805  | 1.367351  | C  | 0 | 5.364184  | 1.424898  |
| H | 0 | 4.978805  | -1.367351 | H  | 0 | 5.355402  | -2.509906 |
| H | 0 | 1.359832  | -4.993234 | H  | 0 | 7.507338  | -1.232952 |
| H | 0 | -1.359832 | -4.993234 | H  | 0 | 7.507338  | 1.232952  |
| N | 0 | 0         | -1.995603 | H  | 0 | 5.355402  | 2.509906  |
|   |   |           |           | C  | 0 | -1.426356 | 5.374402  |
|   |   |           |           | C  | 0 | 1.426356  | 5.374402  |
|   |   |           |           | C  | 0 | 0.705101  | 6.563894  |

|   |   |           |           |
|---|---|-----------|-----------|
| C | 0 | -0.705101 | 6.563894  |
| H | 0 | -2.511006 | 5.363998  |
| H | 0 | 2.511006  | 5.363998  |
| H | 0 | 1.234187  | 7.512101  |
| H | 0 | -1.234187 | 7.512101  |
| C | 0 | -1.426356 | -5.374402 |
| C | 0 | -0.705101 | -6.563894 |
| C | 0 | 0.705101  | -6.563894 |
| C | 0 | 1.426356  | -5.374402 |
| H | 0 | -2.511006 | -5.363998 |
| H | 0 | 2.511006  | -5.363998 |
| C | 0 | -6.55958  | 0.702557  |
| C | 0 | -6.55958  | -0.702557 |
| C | 0 | -5.364184 | -1.424898 |
| C | 0 | -5.364184 | 1.424898  |
| H | 0 | -7.507338 | 1.232952  |
| H | 0 | -7.507338 | -1.232952 |
| H | 0 | -5.355402 | -2.509906 |
| H | 0 | -5.355402 | 2.509906  |
| H | 0 | -1.234187 | -7.512101 |
| H | 0 | 1.234187  | -7.512101 |

**P<sub>N</sub>-2A-2A**

**Mg-P<sub>N</sub>-2A-2A**

|   |           |           |           |   |           |           |   |
|---|-----------|-----------|-----------|---|-----------|-----------|---|
| C | 6.544567  | 1.35441   | -0.096214 | C | -2.831058 | -6.0374   | 0 |
| C | 6.635818  | -0.106836 | -0.080845 | C | -1.437321 | -6.467216 | 0 |
| C | 7.854135  | 1.858423  | -0.089806 | C | -3.630973 | -7.192378 | 0 |
| C | 0.645041  | -3.929197 | 0.043059  | C | 3.696286  | -1.521624 | 0 |
| C | 1.98334   | -3.856884 | -0.070123 | C | 3.326976  | -2.823528 | 0 |
| C | 2.324554  | -2.40901  | -0.039494 | C | 1.852481  | -2.852487 | 0 |
| C | -1.689312 | 1.316078  | 0.298639  | C | -0.848201 | 1.983603  | 0 |
| C | -1.555641 | -0.989596 | 0.300374  | C | 1.332     | 1.324622  | 0 |
| C | 0.158268  | 4.488459  | 0.035901  | C | -4.393961 | 0.925021  | 0 |
| C | 1.495328  | 4.573772  | -0.081506 | C | -4.811333 | -0.361206 | 0 |
| C | -0.151695 | 3.043477  | 0.134756  | C | -2.922146 | 0.905528  | 0 |
| C | 2.004229  | 3.176446  | -0.052292 | C | -3.601559 | -1.206657 | 0 |
| C | 8.050544  | -0.452659 | -0.063027 | C | -1.43196  | -7.924241 | 0 |
| C | 0.168008  | -2.530476 | 0.141312  | C | 2.463034  | -0.720609 | 0 |
| N | 1.194055  | -1.65245  | 0.09145   | N | 1.387551  | -1.558704 | 0 |
| N | 3.581007  | -2.046602 | -0.118877 | N | 1.17567   | -3.971573 | 0 |
| N | 3.29259   | 2.965017  | -0.136778 | N | -3.664509 | -2.510729 | 0 |
| N | -1.426643 | 2.625026  | 0.225399  | N | -2.196018 | 2.031898  | 0 |
| N | -1.144817 | -2.261801 | 0.230055  | N | 2.481412  | 0.619249  | 0 |

|   |            |           |           |   |           |           |   |
|---|------------|-----------|-----------|---|-----------|-----------|---|
| C | 5.394922   | 2.129301  | -0.124035 | C | -3.31731  | -4.737366 | 0 |
| C | 5.591971   | -0.986358 | -0.096274 | C | -0.336742 | -5.655889 | 0 |
| H | 5.829782   | -2.045319 | -0.098068 | H | 0.634506  | -6.141742 | 0 |
| H | 5.544012   | 3.20521   | -0.144129 | H | -4.400077 | -4.639293 | 0 |
| C | -2.983014  | -0.640357 | 0.229129  | C | 1.345512  | 2.800981  | 0 |
| C | -3.06759   | 0.803924  | 0.229074  | C | -0.041282 | 3.220533  | 0 |
| C | -3.992516  | -1.564117 | 0.157072  | C | 2.479257  | 3.572242  | 0 |
| C | -5.400777  | -1.367466 | 0.093087  | C | 2.616982  | 4.989246  | 0 |
| C | -6.097082  | -0.098823 | 0.067326  | C | 1.546531  | 5.963579  | 0 |
| C | -5.554371  | 1.242513  | 0.096011  | C | 0.115433  | 5.746523  | 0 |
| C | -4.178143  | 1.603158  | 0.158746  | C | -0.556513 | 4.491181  | 0 |
| H | -3.958521  | 2.668653  | 0.154613  | H | -1.643848 | 4.530032  | 0 |
| H | -3.649357  | -2.596441 | 0.152121  | H | 3.40539   | 3.001199  | 0 |
| C | -12.737174 | -0.49154  | -0.247412 | C | 3.477794  | 12.33708  | 0 |
| C | -12.067779 | -1.71809  | -0.220506 | C | 4.514121  | 11.399571 | 0 |
| C | -10.691168 | -1.960985 | -0.156832 | C | 4.429354  | 10.002739 | 0 |
| C | -12.217764 | 0.805256  | -0.21832  | C | 2.095401  | 12.132662 | 0 |
| C | -9.640744  | -1.05195  | -0.104241 | C | 3.300251  | 9.191517  | 0 |
| C | -10.879172 | 1.209657  | -0.154131 | C | 1.389897  | 10.924041 | 0 |
| C | -9.7287    | 0.431419  | -0.102775 | C | 1.87829   | 9.622356  | 0 |
| H | -10.403836 | -3.010659 | -0.147236 | H | 5.383118  | 9.478548  | 0 |
| H | -10.71829  | 2.285962  | -0.14275  | H | 0.305643  | 11.017951 | 0 |
| C | -8.254097  | -1.39042  | -0.040488 | C | 3.305666  | 7.762744  | 0 |
| C | -7.509262  | -0.181828 | -0.000134 | C | 1.956676  | 7.318691  | 0 |
| C | -8.391021  | 0.930846  | -0.037918 | C | 1.080793  | 8.436667  | 0 |
| C | -6.17823   | -2.573485 | 0.049049  | C | 3.971317  | 5.466003  | 0 |
| C | -7.552878  | -2.611068 | -0.014652 | C | 4.328813  | 6.79554   | 0 |
| C | -7.837895  | 2.225188  | -0.008649 | C | -0.306985 | 8.199242  | 0 |
| H | -5.627634  | -3.508429 | 0.068806  | H | 4.752263  | 4.712467  | 0 |
| H | -8.067365  | -3.567048 | -0.044232 | H | 5.378718  | 7.073849  | 0 |
| H | -8.461171  | 3.114246  | -0.035797 | H | -1.026343 | 9.013025  | 0 |
| C | -6.468103  | 2.348875  | 0.055253  | C | -0.746794 | 6.894595  | 0 |
| H | -6.031331  | 3.341989  | 0.077463  | H | -1.814576 | 6.700931  | 0 |
| H | 0.235585   | 0.270009  | 0.493717  | C | -0.202361 | -4.212411 | 0 |
| C | 4.158331   | -0.789887 | -0.108022 | N | -2.493699 | -0.387961 | 0 |
| N | 0.967745   | 2.291326  | 0.081676  | C | -2.816676 | -8.34678  | 0 |
| C | 8.783702   | 0.793685  | -0.068554 | C | -2.648534 | -3.477879 | 0 |
| C | 4.014634   | 1.782757  | -0.123222 | C | -1.228135 | -3.217771 | 0 |
| C | 3.481364   | 0.452923  | -0.120234 | H | -4.714819 | -7.198139 | 0 |
| H | 2.39955    | 0.391363  | -0.13932  | C | 0         | 0.854735  | 0 |
| H | 8.116064   | 2.909937  | -0.099747 | C | -3.342958 | -9.665168 | 0 |
| C | -0.828261  | 0.20861   | 0.402104  | C | -0.276877 | -8.723002 | 0 |

|   |            |           |           |    |           |            |   |
|---|------------|-----------|-----------|----|-----------|------------|---|
| C | 10.189865  | 0.995982  | -0.056479 | C  | -2.665477 | -10.85926  | 0 |
| C | 8.555027   | -1.764049 | -0.043307 | C  | -0.176595 | -10.106214 | 0 |
| C | 11.190993  | 0.05788   | -0.037281 | C  | -1.192006 | -11.078137 | 0 |
| C | 9.874799   | -2.186822 | -0.026546 | C  | -3.270222 | -12.155943 | 0 |
| C | 11.058498  | -1.427622 | -0.023294 | C  | -0.99759  | -12.460966 | 0 |
| C | 12.593677  | 0.342     | -0.026713 | C  | -2.263749 | -13.108098 | 0 |
| C | 12.355919  | -1.939679 | -0.0055   | H  | -4.4309   | -9.729049  | 0 |
| C | 13.282174  | -0.859097 | -0.007781 | H  | 0.669173  | -8.189103  | 0 |
| H | 10.506896  | 2.03856   | -0.064081 | H  | 0.837258  | -10.503663 | 0 |
| H | 7.813806   | -2.558123 | -0.040532 | H  | -0.033289 | -12.95457  | 0 |
| H | 10.022948  | -3.265512 | -0.013397 | H  | -4.337357 | -12.339264 | 0 |
| H | 12.610544  | -2.992498 | 0.007893  | H  | -2.411894 | -14.181769 | 0 |
| H | 13.021981  | 1.336348  | -0.032821 | H  | -5.819105 | -0.753375  | 0 |
| H | 14.360603  | -0.967091 | 0.003635  | H  | -4.981451 | 1.833113   | 0 |
| H | 2.129499   | 5.44395   | -0.18246  | H  | 3.946716  | -3.709751  | 0 |
| H | -0.586655  | 5.272506  | 0.057837  | H  | 4.689814  | -1.09432   | 0 |
| H | 2.715203   | -4.646927 | -0.169393 | H  | 1.485374  | 13.031896  | 0 |
| H | -0.002924  | -4.795121 | 0.063124  | H  | 3.79327   | 13.378114  | 0 |
| H | -12.949491 | 1.607885  | -0.24972  | H  | 5.520816  | 11.80858   | 0 |
| H | -13.82187  | -0.555938 | -0.298431 | Mg | -0.605543 | -1.149584  | 0 |
| H | -12.699473 | -2.601551 | -0.253308 |    |           |            |   |

**Zn-P<sub>N</sub>-2A-2A**

|   |           |           |           |
|---|-----------|-----------|-----------|
| C | 6.416755  | 1.324246  | 0.0214    |
| C | 6.507367  | -0.125831 | -0.037945 |
| C | 7.724885  | 1.832517  | 0.068289  |
| C | 0.545603  | -3.978691 | -0.085508 |
| C | 1.894569  | -3.92     | -0.150028 |
| C | 2.255202  | -2.489396 | -0.162527 |
| C | -1.732652 | 1.272852  | 0.146478  |
| C | -1.602601 | -0.991322 | 0.163154  |
| C | 0.054249  | 4.486671  | -0.145766 |
| C | 1.400656  | 4.589132  | -0.189394 |
| C | -0.259723 | 3.049905  | -0.087187 |
| C | 1.930716  | 3.211522  | -0.160986 |
| C | 7.920547  | -0.477181 | -0.029097 |
| C | 0.063121  | -2.589628 | -0.059843 |
| N | 1.113919  | -1.735569 | -0.149881 |
| N | 3.493813  | -2.084414 | -0.128429 |
| N | 3.206269  | 2.960374  | -0.101154 |
| N | -1.508422 | 2.591006  | 0.018291  |
| N | -1.228872 | -2.27686  | 0.050827  |

**Ni-P<sub>N</sub>-2A-2A**

|   |           |           |           |
|---|-----------|-----------|-----------|
| C | -6.369151 | 1.170823  | -0.471473 |
| C | -6.342202 | -0.170995 | 0.082104  |
| C | -7.688681 | 1.642809  | -0.384952 |
| C | -0.522732 | -3.766698 | -1.583809 |
| C | -1.863665 | -3.757158 | -1.447038 |
| C | -2.237216 | -2.394453 | -1.076097 |
| C | 1.602711  | 1.252823  | -0.202447 |
| C | 1.565553  | -0.928666 | -0.750125 |
| C | -0.227999 | 4.353195  | -0.476496 |
| C | -1.50815  | 4.422915  | -0.888759 |
| C | 0.095817  | 2.937579  | -0.336687 |
| C | -2.013282 | 3.050745  | -0.923147 |
| C | -7.685686 | -0.483739 | 0.546039  |
| C | -0.05675  | -2.420996 | -1.271695 |
| N | -1.123144 | -1.578931 | -1.030749 |
| N | -3.457764 | -2.100863 | -0.745328 |
| N | -3.266717 | 2.817453  | -1.139987 |
| N | 1.335649  | 2.552581  | -0.070374 |
| N | 1.233038  | -2.161432 | -1.144218 |

|   |            |           |           |   |           |           |           |
|---|------------|-----------|-----------|---|-----------|-----------|-----------|
| C | 5.257096   | 2.082217  | 0.012868  | C | -5.274021 | 1.877647  | -0.942749 |
| C | 5.451381   | -0.988749 | -0.083335 | C | -5.270838 | -1.012452 | 0.011926  |
| H | 5.687153   | -2.047474 | -0.123946 | H | -5.428647 | -2.041654 | 0.323028  |
| H | 5.402404   | 3.158565  | 0.041925  | H | -5.478032 | 2.88492   | -1.295741 |
| C | -3.037946  | -0.659079 | 0.103775  | C | 2.959507  | -0.610777 | -0.455358 |
| C | -3.120416  | 0.77713   | 0.091456  | C | 2.984006  | 0.779667  | -0.084108 |
| C | -4.048676  | -1.585457 | 0.063033  | C | 3.999607  | -1.504531 | -0.535502 |
| C | -5.457687  | -1.388428 | 0.047011  | C | 5.379288  | -1.311735 | -0.258519 |
| C | -6.15467   | -0.119637 | 0.033974  | C | 6.013823  | -0.085114 | 0.180394  |
| C | -5.608541  | 1.221462  | 0.030885  | C | 5.420899  | 1.211081  | 0.427225  |
| C | -4.231822  | 1.580276  | 0.042429  | C | 4.047823  | 1.561072  | 0.284666  |
| H | -4.011072  | 2.644971  | 0.014016  | H | 3.791824  | 2.596512  | 0.497238  |
| H | -3.706551  | -2.617839 | 0.048463  | H | 3.708307  | -2.501698 | -0.857289 |
| C | -12.802248 | -0.507255 | -0.057773 | C | 12.587176 | -0.462088 | 1.17806   |
| C | -12.132859 | -1.73377  | -0.04261  | C | 11.978448 | -1.648647 | 0.755678  |
| C | -10.755215 | -1.978054 | -0.022035 | C | 10.63088  | -1.884206 | 0.466729  |
| C | -12.280158 | 0.789279  | -0.056796 | C | 12.018766 | 0.789572  | 1.421203  |
| C | -9.702451  | -1.069643 | -0.011275 | C | 9.552916  | -1.006189 | 0.523523  |
| C | -10.940552 | 1.1928    | -0.040357 | C | 10.678536 | 1.179976  | 1.302462  |
| C | -9.788728  | 0.413379  | -0.020085 | C | 9.576891  | 0.427877  | 0.915234  |
| H | -10.468729 | -3.027944 | -0.0133   | H | 10.392445 | -2.898714 | 0.152933  |
| H | -10.778407 | 2.268953  | -0.043833 | H | 10.473453 | 2.219962  | 1.549164  |
| C | -8.314894  | -1.409176 | 0.009485  | C | 8.200297  | -1.332759 | 0.208284  |
| C | -7.567502  | -0.201468 | 0.014203  | C | 7.411408  | -0.165293 | 0.392746  |
| C | -8.449874  | 0.91153   | -0.004542 | C | 8.234351  | 0.91003   | 0.820708  |
| C | -6.237895  | -2.593861 | 0.038949  | C | 6.20233   | -2.476323 | -0.43995  |
| C | -7.613946  | -2.630213 | 0.022169  | C | 7.559735  | -2.512385 | -0.221464 |
| C | -7.89433   | 2.205548  | -0.007282 | C | 7.633172  | 2.161241  | 1.055621  |
| H | -5.687776  | -3.529299 | 0.047762  | H | 5.699637  | -3.379475 | -0.770721 |
| H | -8.130056  | -3.58585  | 0.01812   | H | 8.109484  | -3.435351 | -0.381118 |
| H | -8.517518  | 3.095054  | -0.022007 | H | 8.210603  | 3.02062   | 1.383776  |
| C | -6.523327  | 2.328383  | 0.008302  | C | 6.276058  | 2.281045  | 0.857981  |
| H | -6.085241  | 3.321201  | 0.005088  | H | 5.802672  | 3.241362  | 1.035254  |
| C | 4.010846   | -0.793262 | -0.065728 | C | -3.924799 | -0.836305 | -0.499028 |
| N | 0.885123   | 2.32602   | -0.139858 | N | -1.001949 | 2.154066  | -0.600643 |
| C | 8.655463   | 0.768288  | 0.039608  | C | -8.506768 | 0.668119  | 0.234017  |
| C | 3.871409   | 1.73496   | -0.028187 | C | -3.875029 | 1.594536  | -0.925872 |
| C | 3.255505   | 0.422782  | 0.015024  | C | -3.165321 | 0.354843  | -0.735449 |
| H | 7.985411   | 2.883492  | 0.115842  | H | -8.030259 | 2.613683  | -0.724719 |
| C | -0.825795  | 0.189934  | 0.308401  | C | 0.721518  | 0.198466  | -0.563118 |
| C | 10.060778  | 0.96752   | 0.07442   | C | -9.890789 | 0.859725  | 0.478467  |
| C | 8.423023   | -1.787456 | -0.078703 | C | -8.059484 | -1.683895 | 1.16928   |

|    |            |           |           |    |            |           |           |
|----|------------|-----------|-----------|----|------------|-----------|-----------|
| C  | 11.061174  | 0.027558  | 0.051501  | C  | -10.784187 | -0.000244 | 1.069729  |
| C  | 9.743158   | -2.211893 | -0.073478 | C  | -9.309508  | -2.06735  | 1.63381   |
| C  | 10.92672   | -1.455368 | -0.017526 | C  | -10.525756 | -1.364446 | 1.61148   |
| C  | 12.463624  | 0.308085  | 0.089943  | C  | -12.172684 | 0.265661  | 1.282284  |
| C  | 12.224369  | -1.970333 | -0.017153 | C  | -11.745842 | -1.830399 | 2.107775  |
| C  | 13.151403  | -0.893786 | 0.048562  | C  | -12.739971 | -0.835918 | 1.904198  |
| H  | 10.379459  | 2.008415  | 0.126678  | H  | -10.29143  | 1.818551  | 0.15009   |
| H  | 7.680088   | -2.578642 | -0.128349 | H  | -7.264272  | -2.410594 | 1.31244   |
| H  | 9.890699   | -3.289838 | -0.119697 | H  | -9.360272  | -3.057054 | 2.085264  |
| H  | 12.476991  | -3.022884 | -0.060078 | H  | -11.901155 | -2.796724 | 2.572101  |
| H  | 12.893318  | 1.300584  | 0.142336  | H  | -12.676476 | 1.180861  | 0.997618  |
| H  | 14.229638  | -1.003594 | 0.063446  | H  | -13.78038  | -0.929912 | 2.193028  |
| H  | 2.021582   | 5.4738    | -0.222979 | H  | -2.123686  | 5.282025  | -1.114041 |
| H  | -0.692908  | 5.268481  | -0.134006 | H  | 0.490199   | 5.140727  | -0.296943 |
| H  | 2.61643    | -4.724894 | -0.168855 | H  | -2.581439  | -4.558235 | -1.551314 |
| H  | -0.101868  | -4.843762 | -0.041989 | H  | 0.146789   | -4.580248 | -1.824807 |
| H  | -13.011845 | 1.592547  | -0.070922 | H  | 12.706316  | 1.565845  | 1.745893  |
| H  | -13.888066 | -0.570708 | -0.072668 | H  | 13.660973  | -0.524166 | 1.340855  |
| H  | -12.765928 | -2.616947 | -0.047446 | H  | 12.640632  | -2.50182  | 0.636007  |
| Zn | 1.191311   | 0.30485   | 0.16456   | Ni | -1.156325  | 0.281584  | -0.740199 |

**P<sub>N</sub>-A-2A**

**P<sub>N</sub>-2A-N-2A-N**

|   |           |           |           |   |           |           |   |
|---|-----------|-----------|-----------|---|-----------|-----------|---|
| C | 3.412637  | 1.424721  | -0.115911 | C | -1.787572 | -8.104185 | 0 |
| C | 3.576791  | -0.029069 | -0.123865 | C | -3.180245 | -7.628453 | 0 |
| C | 4.696949  | 1.993923  | -0.135117 | C | -1.823512 | -9.502044 | 0 |
| C | -2.215355 | -4.145788 | 0.118101  | C | -4.352903 | -0.617027 | 0 |
| C | -0.881296 | -4.003352 | 0.130615  | C | -4.799815 | -1.885148 | 0 |
| C | -0.614406 | -2.541768 | 0.028672  | C | -3.600392 | -2.754712 | 0 |
| C | -4.797466 | 0.979723  | -0.037837 | C | 1.333593  | -0.35655  | 0 |
| C | -4.552133 | -1.314294 | -0.053938 | C | -0.833711 | 0.390915  | 0 |
| C | -3.115785 | 4.247251  | -0.015029 | C | 3.48223   | -3.319314 | 0 |
| C | -1.783096 | 4.396843  | 0.056733  | C | 3.055334  | -4.594452 | 0 |
| C | -3.356097 | 2.790025  | 0.061814  | C | 2.263667  | -2.491381 | 0 |
| C | -1.20827  | 3.026137  | 0.014928  | C | 1.575462  | -4.543634 | 0 |
| C | 5.007745  | -0.303216 | 0.415089  | C | -4.037594 | -8.80362  | 0 |
| C | -2.76243  | -2.776385 | -0.155744 | C | -2.882254 | -0.713376 | 0 |
| N | -1.777492 | -1.845322 | 0.026641  | N | -2.444429 | -1.976875 | 0 |
| N | 0.625833  | -2.112909 | -0.001791 | N | -3.770531 | -4.042821 | 0 |
| N | 0.092831  | 2.875509  | -0.150348 | N | 0.919735  | -5.664688 | 0 |
| N | -4.603423 | 2.305129  | -0.167622 | N | 2.378182  | -1.137168 | 0 |
| N | -4.082664 | -2.56909  | -0.206795 | N | -2.138716 | 0.422314  | 0 |
| C | 2.230931  | 2.143901  | -0.035255 | C | -0.631102 | -7.334724 | 0 |

|   |            |           |           |   |           |           |   |
|---|------------|-----------|-----------|---|-----------|-----------|---|
| C | 2.580161   | -0.959007 | 0.313168  | C | -3.596937 | -6.328736 | 0 |
| H | 2.869156   | -2.005086 | 0.044185  | H | -4.666517 | -6.143792 | 0 |
| H | 2.327443   | 3.22589   | 0.003897  | H | 0.308239  | -7.880958 | 0 |
| C | -5.985748  | -1.033612 | 0.081691  | C | 0.021243  | 1.582874  | 0 |
| C | -6.139942  | 0.403328  | 0.049365  | C | 1.394788  | 1.109826  | 0 |
| C | -6.966156  | -2.012463 | 0.084543  | C | -0.458051 | 2.850778  | 0 |
| C | -8.352109  | -1.830102 | 0.127178  | C | 0.265516  | 4.101348  | 0 |
| C | -9.081894  | -0.636755 | 0.130477  | C | 1.708611  | 4.256387  | 0 |
| C | -8.621595  | 0.683282  | 0.156053  | C | 2.751014  | 3.246468  | 0 |
| C | -7.305123  | 1.153741  | 0.049858  | C | 2.552423  | 1.814887  | 0 |
| H | -7.150933  | 2.230231  | -0.014377 | H | 3.457197  | 1.211243  | 0 |
| H | -6.587601  | -3.031831 | 0.060365  | H | -1.542729 | 2.930986  | 0 |
| H | -2.824155  | 0.028423  | 0.144239  | C | 3.914469  | 10.678134 | 0 |
| C | 1.136656   | -0.833012 | 0.136594  | C | 2.476136  | 10.478747 | 0 |
| N | -2.196601  | 2.092035  | 0.192555  | C | 1.760496  | 9.21225   | 0 |
| C | 5.677843   | 0.979545  | -0.222412 | C | 4.926966  | 9.637235  | 0 |
| C | 0.865303   | 1.73053   | -0.004975 | C | 2.19208   | 7.929051  | 0 |
| C | 0.399469   | 0.376769  | -0.307723 | C | 4.713941  | 8.198067  | 0 |
| H | -0.6773    | 0.262183  | -0.099353 | C | 3.585239  | 7.450435  | 0 |
| H | 4.904565   | 3.057596  | -0.048635 | H | 0.679822  | 9.339426  | 0 |
| C | -3.882629  | -0.083886 | -0.111161 | H | 5.645033  | 7.634975  | 0 |
| C | 7.071358   | 1.254828  | -0.08706  | C | 1.330474  | 6.742881  | 0 |
| C | 5.57638    | -1.586151 | -0.115911 | C | 2.168116  | 5.593206  | 0 |
| C | 8.116685   | 0.36774   | -0.123865 | C | 3.535563  | 5.98499   | 0 |
| C | 6.916985   | -1.940388 | -0.135117 | C | -0.538426 | 5.257525  | 0 |
| C | 8.058139   | -1.122014 | 0.118101  | C | -0.041085 | 6.56663   | 0 |
| C | 9.502849   | 0.7208    | 0.130615  | C | 4.508646  | 5.002371  | 0 |
| C | 9.3796     | -1.568887 | 0.028672  | H | -1.614823 | 5.114638  | 0 |
| C | 10.250615  | -0.444431 | -0.037837 | H | -0.730975 | 7.40501   | 0 |
| H | 7.334723   | 2.312076  | -0.053938 | H | 5.568257  | 5.239342  | 0 |
| H | 4.877256   | -2.417101 | -0.015029 | C | 4.095857  | 3.664045  | 0 |
| H | 7.12003    | -3.010022 | 0.056733  | H | 4.856861  | 2.889543  | 0 |
| H | 9.686084   | -2.607745 | 0.061814  | C | 3.468295  | 13.131089 | 0 |
| H | 9.881365   | 1.735095  | 0.014928  | C | 4.383217  | 12.043484 | 0 |
| H | 11.332298  | -0.498497 | 0.415089  | C | 5.773224  | 12.339665 | 0 |
| H | -1.19138   | 5.297057  | -0.155744 | C | 1.635491  | 11.597475 | 0 |
| H | -3.897366  | 4.99472   | 0.026641  | C | 2.114048  | 12.913601 | 0 |
| H | -0.110308  | -4.753738 | -0.001791 | C | 6.277498  | 10.003665 | 0 |
| H | -2.818252  | -5.043758 | -0.150348 | C | 6.708309  | 11.336174 | 0 |
| H | -9.392838  | 1.449153  | -0.167622 | H | 0.562644  | 11.431032 | 0 |
| H | -10.161783 | -0.751999 | -0.206795 | H | 1.415787  | 13.744791 | 0 |
| H | -8.943816  | -2.741136 | -0.035255 | H | 7.021734  | 9.213194  | 0 |



|   |           |           |   |
|---|-----------|-----------|---|
| H | 7.769874  | 11.563159 | 0 |
| H | -0.334631 | -1.672881 | 0 |
| C | -2.859419 | -5.086781 | 0 |
| N | 1.141565  | -3.217141 | 0 |
| C | -3.166079 | -9.954448 | 0 |
| C | -0.439926 | -5.930956 | 0 |
| C | -1.463488 | -4.937185 | 0 |
| H | -1.107189 | -3.914641 | 0 |

| <b>PN-2A-A</b> |           |           |           | <b>PN-3A-A</b> |           |            |           |
|----------------|-----------|-----------|-----------|----------------|-----------|------------|-----------|
| C              | 0.099521  | -8.454    | 0.735944  | C              | 0.17951   | -11.635535 | 0.736204  |
| C              | 0.099521  | -8.454    | -0.735944 | C              | 0.17951   | -11.635535 | -0.736204 |
| C              | 0.088622  | -9.81226  | 1.144197  | C              | 0.184639  | -12.993339 | 1.144652  |
| C              | -0.02775  | -2.256578 | -4.216543 | C              | -0.022948 | -5.437707  | -4.214374 |
| C              | 0.085179  | -3.596949 | -4.223449 | C              | 0.106189  | -6.776422  | -4.222411 |
| C              | 0.056054  | -4.023712 | -2.799065 | C              | 0.083441  | -7.20469   | -2.797926 |
| C              | -0.283843 | -0.230242 | 1.155223  | C              | -0.300818 | -3.410684  | 1.155424  |
| C              | -0.283843 | -0.230242 | -1.155223 | C              | -0.300818 | -3.410684  | -1.155424 |
| C              | -0.02775  | -2.256578 | 4.216543  | C              | -0.022948 | -5.437707  | 4.214374  |
| C              | 0.085179  | -3.596949 | 4.223449  | C              | 0.106189  | -6.776422  | 4.222411  |
| C              | -0.124533 | -1.862942 | 2.792284  | C              | -0.122815 | -5.045485  | 2.789168  |
| C              | 0.056054  | -4.023712 | 2.799065  | C              | 0.083441  | -7.20469   | 2.797926  |
| C              | 0.088622  | -9.81226  | -1.144197 | C              | 0.184639  | -12.993339 | -1.144652 |
| C              | -0.124533 | -1.862942 | -2.792284 | C              | -0.122815 | -5.045485  | -2.789168 |
| N              | -0.074577 | -2.934038 | -1.976279 | N              | -0.059113 | -6.115856  | -1.974523 |
| N              | 0.137412  | -5.295343 | -2.510474 | N              | 0.179902  | -8.474862  | -2.511353 |
| N              | 0.137412  | -5.295343 | 2.510474  | N              | 0.179902  | -8.474862  | 2.511353  |
| N              | -0.212437 | -0.563789 | 2.446623  | N              | -0.226828 | -3.746271  | 2.445936  |
| N              | -0.212437 | -0.563789 | -2.446623 | N              | -0.226828 | -3.746271  | -2.445936 |
| C              | 0.12114   | -7.358246 | 1.567347  | C              | 0.187813  | -10.538371 | 1.567096  |
| C              | 0.12114   | -7.358246 | -1.567347 | C              | 0.187813  | -10.538371 | -1.567096 |
| H              | 0.132309  | -7.558851 | -2.635196 | H              | 0.201121  | -10.738866 | -2.634998 |
| H              | 0.132309  | -7.558851 | 2.635196  | H              | 0.201121  | -10.738866 | 2.634998  |
| C              | -0.218424 | 1.176393  | -0.722164 | C              | -0.259811 | -2.000484  | -0.723683 |
| C              | -0.218424 | 1.176393  | 0.722164  | C              | -0.259811 | -2.000484  | 0.723683  |
| C              | -0.151303 | 2.238487  | -1.58629  | C              | -0.212538 | -0.940899  | -1.586344 |
| C              | -0.092919 | 3.63255   | -1.307293 | C              | -0.178003 | 0.459333   | -1.308072 |
| C              | -0.067885 | 4.253649  | 0         | C              | -0.163543 | 1.080726   | 0         |
| C              | -0.092919 | 3.63255   | 1.307293  | C              | -0.178003 | 0.459333   | 1.308072  |
| C              | -0.151303 | 2.238487  | 1.58629   | C              | -0.212538 | -0.940899  | 1.586344  |
| H              | -0.14589  | 1.955176  | 2.636654  | H              | -0.202991 | -1.222675  | 2.637128  |

|   |           |            |           |   |           |           |           |
|---|-----------|------------|-----------|---|-----------|-----------|-----------|
| H | -0.14589  | 1.955176   | -2.636654 | H | -0.202991 | -1.222675 | -2.637128 |
| C | 0.228105  | 10.906035  | 0         | C | 0.023095  | 7.79091   | 0         |
| C | 0.201249  | 10.310126  | -1.263752 | C | 0.004866  | 7.168985  | -1.305055 |
| C | 0.140448  | 8.95045    | -1.588082 | C | -0.034988 | 5.776458  | -1.579663 |
| C | 0.201249  | 10.310126  | 1.263752  | C | 0.004866  | 7.168985  | 1.305055  |
| C | 0.091324  | 7.847567   | -0.742606 | C | -0.065372 | 4.687347  | -0.737953 |
| C | 0.140448  | 8.95045    | 1.588082  | C | -0.034988 | 5.776458  | 1.579663  |
| C | 0.091324  | 7.847567   | 0.742606  | C | -0.065372 | 4.687347  | 0.737953  |
| H | 0.130483  | 8.725986   | -2.652916 | H | -0.04186  | 5.535416  | -2.640787 |
| H | 0.130483  | 8.725986   | 2.652916  | H | -0.04186  | 5.535416  | 2.640787  |
| C | 0.031045  | 6.48305    | -1.162503 | C | -0.102966 | 3.310666  | -1.162213 |
| C | -0.005432 | 5.668247   | 0         | C | -0.125509 | 2.49584   | 0         |
| C | 0.031045  | 6.48305    | 1.162503  | C | -0.102966 | 3.310666  | 1.162213  |
| C | -0.053474 | 4.480035   | -2.465779 | C | -0.153453 | 1.304494  | -2.460477 |
| C | 0.005605  | 5.854581   | -2.422208 | C | -0.117685 | 2.686017  | -2.415422 |
| C | 0.005605  | 5.854581   | 2.422208  | C | -0.117685 | 2.686017  | 2.415422  |
| H | -0.072855 | 3.985419   | -3.431415 | H | -0.164327 | 0.812534  | -3.427706 |
| H | 0.032026  | 6.424349   | -3.346415 | H | -0.101105 | 3.255316  | -3.340362 |
| H | 0.032026  | 6.424349   | 3.346415  | H | -0.101105 | 3.255316  | 3.340362  |
| C | -0.053474 | 4.480035   | 2.465779  | C | -0.153453 | 1.304494  | 2.460477  |
| H | -0.072855 | 3.985419   | 3.431415  | H | -0.164327 | 0.812534  | 3.427706  |
| H | -0.47047  | -2.092061  | 0         | C | 0.201636  | 13.849623 | -1.264928 |
| C | 0.125729  | -5.951874  | -1.288046 | C | 0.161059  | 12.488145 | -1.588798 |
| N | -0.074577 | -2.934038  | 1.976279  | C | 0.201636  | 13.849623 | 1.264928  |
| C | 0.080474  | -10.622983 | 0         | C | 0.128531  | 11.384891 | -0.744797 |
| H | 0.070458  | -11.706509 | 0         | C | 0.161059  | 12.488145 | 1.588798  |
| C | 0.125729  | -5.951874  | 1.288046  | C | 0.128531  | 11.384891 | 0.744797  |
| C | 0.128893  | -5.347314  | 0         | H | 0.221912  | 14.53353  | -2.108833 |
| H | 0.146157  | -4.263896  | 0         | H | 0.154301  | 12.264029 | -2.653963 |
| H | 0.087277  | -10.151382 | 2.172741  | H | 0.221912  | 14.53353  | 2.108833  |
| H | 0.087277  | -10.151382 | -2.172741 | H | 0.154301  | 12.264029 | 2.653963  |
| C | -0.382963 | -1.026081  | 0         | C | 0.088321  | 10.021502 | -1.164214 |
| H | 0.183332  | -4.280986  | -5.055347 | C | 0.064508  | 9.206626  | 0         |
| H | -0.048243 | -1.55899   | -5.043041 | C | 0.088321  | 10.021502 | 1.164214  |
| H | 0.183332  | -4.280986  | 5.055347  | C | 0.029129  | 8.017409  | -2.46676  |
| H | -0.048243 | -1.55899   | 5.043041  | C | 0.069438  | 9.390379  | -2.425571 |
| H | 0.231751  | 10.993088  | 2.10831   | C | 0.029129  | 8.017409  | 2.46676   |
| H | 0.276701  | 11.992693  | 0         | C | 0.069438  | 9.390379  | 2.425571  |
| H | 0.231751  | 10.993088  | -2.10831  | H | 0.014327  | 7.52377   | -3.433588 |
|   |           |            |           | H | 0.085851  | 9.960036  | -3.34984  |
|   |           |            |           | H | 0.014327  | 7.52377   | 3.433588  |
|   |           |            |           | H | 0.085851  | 9.960036  | 3.34984   |

|   |           |            |           |
|---|-----------|------------|-----------|
| H | 0.251933  | 15.531034  | 0         |
| H | -0.452222 | -5.274825  | 0         |
| C | 0.175794  | -9.133203  | -1.288048 |
| N | -0.059113 | -6.115856  | 1.974523  |
| C | 0.186117  | -13.803681 | 0         |
| H | 0.188875  | -14.887417 | 0         |
| C | 0.175794  | -9.133203  | 1.288048  |
| C | 0.171724  | -8.528496  | 0         |
| H | 0.175836  | -7.444885  | 0         |
| H | 0.187194  | -13.332466 | 2.173202  |
| H | 0.187194  | -13.332466 | -2.173202 |
| C | -0.384893 | -4.207392  | 0         |
| C | 0.219523  | 14.443553  | 0         |
| H | 0.211527  | -7.458934  | -5.05477  |
| H | -0.052763 | -4.739563  | -5.040222 |
| H | 0.211527  | -7.458934  | 5.05477   |
| H | -0.052763 | -4.739563  | 5.040222  |

**Mg-P<sub>N</sub>-3A-A**

**Zn-P<sub>N</sub>-3A-A**

|   |   |           |           |   |           |            |           |
|---|---|-----------|-----------|---|-----------|------------|-----------|
| C | 0 | 0.732964  | 11.511593 | C | 0.01143   | -11.177664 | 0.730895  |
| C | 0 | -0.732964 | 11.511593 | C | 0.01143   | -11.177664 | -0.730895 |
| C | 0 | 1.142874  | 12.870967 | C | -0.010032 | -12.534757 | 1.144486  |
| C | 0 | -4.226008 | 5.296218  | C | 0.118827  | -5.004638  | -4.236686 |
| C | 0 | -4.252491 | 6.648679  | C | 0.169562  | -6.354712  | -4.260237 |
| C | 0 | -2.850286 | 7.107313  | C | 0.165817  | -6.803122  | -2.854425 |
| C | 0 | 1.138841  | 3.257947  | C | -0.151265 | -3.034283  | 1.133296  |
| C | 0 | -1.138841 | 3.257947  | C | -0.151265 | -3.034283  | -1.133296 |
| C | 0 | 4.226008  | 5.296218  | C | 0.118827  | -5.004638  | 4.236686  |
| C | 0 | 4.252491  | 6.648679  | C | 0.169562  | -6.354712  | 4.260237  |
| C | 0 | 2.811719  | 4.889347  | C | 0.08313   | -4.60762   | 2.820391  |
| C | 0 | 2.850286  | 7.107313  | C | 0.165817  | -6.803122  | 2.854425  |
| C | 0 | -1.142874 | 12.870967 | C | -0.010032 | -12.534757 | -1.144486 |
| C | 0 | -2.811719 | 4.889347  | C | 0.08313   | -4.60762   | -2.820391 |
| N | 0 | -2.027718 | 5.999783  | N | 0.158229  | -5.704066  | -2.031344 |
| N | 0 | -2.529476 | 8.371143  | N | 0.109687  | -8.059474  | -2.527521 |
| N | 0 | 2.529476  | 8.371143  | N | 0.109687  | -8.059474  | 2.527521  |
| N | 0 | 2.441685  | 3.598322  | N | -0.02346  | -3.331978  | 2.434491  |
| N | 0 | -2.441685 | 3.598322  | N | -0.02346  | -3.331978  | -2.434491 |
| C | 0 | 1.564753  | 10.4139   | C | 0.032846  | -10.069533 | 1.544263  |
| C | 0 | -1.564753 | 10.4139   | C | 0.032846  | -10.069533 | -1.544263 |
| H | 0 | -2.63193  | 10.622677 | H | 0.040513  | -10.266637 | -2.612905 |
| H | 0 | 2.63193   | 10.622677 | H | 0.040513  | -10.266637 | 2.612905  |

|   |   |           |            |   |           |           |           |
|---|---|-----------|------------|---|-----------|-----------|-----------|
| C | 0 | -0.724581 | 1.836772   | C | -0.098611 | -1.61629  | -0.719186 |
| C | 0 | 0.724581  | 1.836772   | C | -0.098611 | -1.61629  | 0.719186  |
| C | 0 | -1.585968 | 0.773852   | C | -0.06082  | -0.557324 | -1.585626 |
| C | 0 | -1.307718 | -0.626808  | C | -0.055801 | 0.84255   | -1.308221 |
| C | 0 | 0         | -1.249477  | C | -0.054513 | 1.46565   | 0         |
| C | 0 | 1.307718  | -0.626808  | C | -0.055801 | 0.84255   | 1.308221  |
| C | 0 | 1.585968  | 0.773852   | C | -0.06082  | -0.557324 | 1.585626  |
| H | 0 | 2.637871  | 1.05218    | H | -0.0369   | -0.839228 | 2.635931  |
| H | 0 | -2.637871 | 1.05218    | H | -0.0369   | -0.839228 | -2.635931 |
| C | 0 | 0         | -7.962491  | C | 0.00082   | 8.178164  | 0         |
| C | 0 | -1.304918 | -7.340011  | C | -0.004693 | 7.555167  | -1.305106 |
| C | 0 | -1.579638 | -5.947151  | C | -0.016595 | 6.163065  | -1.579804 |
| C | 0 | 1.304918  | -7.340011  | C | -0.004693 | 7.555167  | 1.305106  |
| C | 0 | -0.737954 | -4.857249  | C | -0.025935 | 5.072591  | -0.737469 |
| C | 0 | 1.579638  | -5.947151  | C | -0.016595 | 6.163065  | 1.579804  |
| C | 0 | 0.737954  | -4.857249  | C | -0.025935 | 5.072591  | 0.737469  |
| H | 0 | -2.64077  | -5.706033  | H | -0.018294 | 5.921737  | -2.640864 |
| H | 0 | 2.64077   | -5.706033  | H | -0.018294 | 5.921737  | 2.640864  |
| C | 0 | -1.161926 | -3.480315  | C | -0.036254 | 3.696067  | -1.161857 |
| C | 0 | 0         | -2.664707  | C | -0.04316  | 2.879922  | 0         |
| C | 0 | 1.161926  | -3.480315  | C | -0.036254 | 3.696067  | 1.161857  |
| C | 0 | -2.459925 | -1.47315   | C | -0.045422 | 1.688913  | -2.460323 |
| C | 0 | -2.415073 | -2.855083  | C | -0.037485 | 3.070888  | -2.414988 |
| C | 0 | 2.415073  | -2.855083  | C | -0.037485 | 3.070888  | 2.414988  |
| H | 0 | -3.427251 | -0.981149  | H | -0.045108 | 1.197037  | -3.42771  |
| H | 0 | -3.340129 | -3.424554  | H | -0.031553 | 3.640502  | -3.339951 |
| H | 0 | 3.340129  | -3.424554  | H | -0.031553 | 3.640502  | 3.339951  |
| C | 0 | 2.459925  | -1.47315   | C | -0.045422 | 1.688913  | 2.460323  |
| H | 0 | 3.427251  | -0.981149  | H | -0.045108 | 1.197037  | 3.42771   |
| C | 0 | -1.264878 | -14.023868 | C | 0.056598  | 14.238975 | -1.264807 |
| C | 0 | -1.588804 | -12.661816 | C | 0.043815  | 12.877334 | -1.58889  |
| C | 0 | 1.264878  | -14.023868 | C | 0.056598  | 14.238975 | 1.264807  |
| C | 0 | -0.74486  | -11.557976 | C | 0.033565  | 11.773112 | -0.744595 |
| C | 0 | 1.588804  | -12.661816 | C | 0.043815  | 12.877334 | 1.58889   |
| C | 0 | 0.74486   | -11.557976 | C | 0.033565  | 11.773112 | 0.744595  |
| H | 0 | -2.108816 | -14.708067 | H | 0.063001  | 14.923145 | -2.108803 |
| H | 0 | -2.653982 | -12.437627 | H | 0.041708  | 12.653115 | -2.654035 |
| H | 0 | 2.108816  | -14.708067 | H | 0.063001  | 14.923145 | 2.108803  |
| H | 0 | 2.653982  | -12.437627 | H | 0.041708  | 12.653115 | 2.654035  |
| C | 0 | -1.164141 | -10.194094 | C | 0.021008  | 10.409575 | -1.163968 |
| C | 0 | 0         | -9.378783  | C | 0.013599  | 9.59385   | 0         |
| C | 0 | 1.164141  | -10.194094 | C | 0.021008  | 10.409575 | 1.163968  |

|    |   |           |            |    |           |            |           |
|----|---|-----------|------------|----|-----------|------------|-----------|
| C  | 0 | -2.46669  | -8.18903   | C  | 0.002766  | 8.404608   | -2.466855 |
| C  | 0 | -2.425528 | -9.562485  | C  | 0.015173  | 9.777915   | -2.425399 |
| C  | 0 | 2.46669   | -8.18903   | C  | 0.002766  | 8.404608   | 2.466855  |
| C  | 0 | 2.425528  | -9.562485  | C  | 0.015173  | 9.777915   | 2.425399  |
| H  | 0 | -3.433511 | -7.695135  | H  | -0.001743 | 7.910869   | -3.433752 |
| H  | 0 | -3.349822 | -10.13237  | H  | 0.020265  | 10.347876  | -3.349663 |
| H  | 0 | 3.433511  | -7.695135  | H  | -0.001743 | 7.910869   | 3.433752  |
| H  | 0 | 3.349822  | -10.13237  | H  | 0.020265  | 10.347876  | 3.349663  |
| H  | 0 | 0         | -15.706137 | H  | 0.072472  | 15.921587  | 0         |
| C  | 0 | -1.276144 | 9.006035   | C  | 0.040326  | -8.656879  | -1.265156 |
| N  | 0 | 2.027718  | 5.999783   | N  | 0.158229  | -5.704066  | 2.031344  |
| C  | 0 | 0         | 13.683672  | C  | -0.024147 | -13.34622  | 0         |
| H  | 0 | 0         | 14.767294  | H  | -0.041386 | -14.429793 | 0         |
| C  | 0 | 1.276144  | 9.006035   | C  | 0.040326  | -8.656879  | 1.265156  |
| C  | 0 | 0         | 8.349944   | C  | -0.019284 | -7.97119   | 0         |
| H  | 0 | 2.172192  | 13.208592  | H  | -0.013766 | -12.873005 | 2.173467  |
| H  | 0 | -2.172192 | 13.208592  | H  | -0.013766 | -12.873005 | -2.173467 |
| C  | 0 | 0         | 4.093698   | C  | -0.314169 | -3.878353  | 0         |
| C  | 0 | 0         | -14.618171 | C  | 0.062244  | 14.833698  | 0         |
| H  | 0 | -5.103508 | 7.316043   | H  | 0.189325  | -7.027021  | -5.107014 |
| H  | 0 | -5.051324 | 4.597147   | H  | 0.088855  | -4.304277  | -5.060265 |
| H  | 0 | 5.103508  | 7.316043   | H  | 0.189325  | -7.027021  | 5.107014  |
| H  | 0 | 5.051324  | 4.597147   | H  | 0.088855  | -4.304277  | 5.060265  |
| Mg | 0 | 0         | 6.191737   | Zn | -0.159928 | -5.903438  | 0         |

**Ni-P<sub>N</sub>-3A-A**

|   |            |           |           |
|---|------------|-----------|-----------|
| C | -11.107357 | -0.601155 | -0.412814 |
| C | -11.107321 | 0.601085  | 0.413184  |
| C | -12.464705 | -0.936887 | -0.65808  |
| C | -5.081422  | 4.117675  | 0.049767  |
| C | -6.386799  | 4.111779  | 0.382749  |
| C | -6.815712  | 2.714992  | 0.37744   |
| C | -3.083849  | -1.115698 | 0.139406  |
| C | -3.083848  | 1.115733  | -0.139589 |
| C | -5.081398  | -4.117645 | -0.050018 |
| C | -6.386774  | -4.111748 | -0.383011 |
| C | -4.676777  | -2.724093 | 0.094016  |
| C | -6.815706  | -2.714968 | -0.377623 |
| C | -12.46465  | 0.936776  | 0.658626  |
| C | -4.676784  | 2.724119  | -0.094199 |
| N | -5.752069  | 1.881304  | 0.06034   |
| N | -8.041418  | 2.398631  | 0.64418   |

**P<sub>N</sub>-A-A**

|   |           |           |           |
|---|-----------|-----------|-----------|
| C | 0.002813  | 5.415304  | 0.735184  |
| C | 0.002813  | 5.415304  | -0.735184 |
| C | 0.04602   | 6.774205  | 1.143119  |
| C | -0.024491 | -0.778097 | -4.222112 |
| C | -0.104534 | 0.564914  | -4.226452 |
| C | -0.060577 | 0.988183  | -2.802072 |
| C | 0.19155   | -2.800953 | 1.153629  |
| C | 0.19155   | -2.800953 | -1.153629 |
| C | -0.024491 | -0.778097 | 4.222112  |
| C | -0.104534 | 0.564914  | 4.226452  |
| C | 0.068428  | -1.175109 | 2.799817  |
| C | -0.060577 | 0.988183  | 2.802072  |
| C | 0.04602   | 6.774205  | -1.143119 |
| C | 0.068428  | -1.175109 | -2.799817 |
| N | 0.047044  | -0.100686 | -1.98083  |
| N | -0.110662 | 2.263456  | -2.509165 |

|   |            |           |           |   |           |           |           |
|---|------------|-----------|-----------|---|-----------|-----------|-----------|
| N | -8.041429  | -2.398606 | -0.644273 | N | -0.110662 | 2.263456  | 2.509165  |
| N | -3.396812  | -2.407856 | 0.234103  | N | 0.125647  | -2.471099 | 2.449463  |
| N | -3.396819  | 2.407893  | -0.234274 | N | 0.125647  | -2.471099 | -2.449463 |
| C | -9.990169  | -1.320897 | -0.762006 | C | -0.045455 | 4.323114  | 1.567747  |
| C | -9.990114  | 1.320872  | 0.762219  | C | -0.045455 | 4.323114  | -1.567747 |
| H | -10.166437 | 2.249724  | 1.29896   | H | -0.052356 | 4.5238    | -2.635506 |
| H | -10.16653  | -2.249744 | -1.298744 | H | -0.052356 | 4.5238    | 2.635506  |
| C | -1.675295  | 0.712628  | -0.101591 | C | 0.080341  | -4.196866 | -0.720642 |
| C | -1.675295  | -0.712588 | 0.101433  | C | 0.080341  | -4.196866 | 0.720642  |
| C | -0.615639  | 1.571205  | -0.223362 | C | -0.024643 | -5.273213 | -1.592257 |
| C | 0.783192   | 1.294767  | -0.186996 | C | -0.123896 | -6.629443 | -1.263856 |
| C | 1.40545    | 0.000015  | -0.000044 | C | -0.165277 | -7.227739 | 0         |
| C | 0.783187   | -1.294736 | 0.1869    | C | -0.123896 | -6.629443 | 1.263856  |
| C | -0.615645  | -1.571167 | 0.223242  | C | -0.024643 | -5.273213 | 1.592257  |
| H | -0.894995  | -2.612543 | 0.365714  | H | -0.022998 | -5.003715 | 2.645804  |
| H | -0.894977  | 2.612585  | -0.365826 | H | -0.022998 | -5.003715 | -2.645804 |
| C | 8.117839   | -0.000004 | 0.000018  | H | 0.438438  | -0.944355 | 0         |
| C | 7.495717   | 1.29207   | -0.18344  | C | -0.083454 | 2.914194  | -1.288385 |
| C | 6.102869   | 1.563877  | -0.223997 | N | 0.047044  | -0.100686 | 1.98083   |
| C | 7.495706   | -1.292074 | 0.183461  | C | 0.073597  | 7.58551   | 0         |
| C | 5.012817   | 0.730814  | -0.105398 | H | 0.109356  | 8.66817   | 0         |
| C | 6.102857   | -1.563873 | 0.223988  | C | -0.083454 | 2.914194  | 1.288385  |
| C | 5.012811   | -0.730801 | 0.105371  | C | -0.100869 | 2.31028   | 0         |
| H | 5.861966   | 2.614315  | -0.374676 | H | -0.144202 | 1.227756  | 0         |
| H | 5.861941   | -2.614309 | 0.374657  | H | 0.055144  | 7.113015  | 2.171739  |
| C | 3.636658   | 1.15013   | -0.166337 | H | 0.055144  | 7.113015  | -2.171739 |
| C | 2.820739   | 0.000012  | -0.000033 | C | 0.315547  | -2.006574 | 0         |
| C | 3.636651   | -1.15011  | 0.166285  | H | -0.189438 | 1.251775  | -5.057337 |
| C | 1.630351   | 2.435856  | -0.35235  | H | -0.024193 | -1.474318 | -5.049811 |
| C | 3.011436   | 2.391167  | -0.345854 | H | -0.189438 | 1.251775  | 5.057337  |
| C | 3.011423   | -2.391144 | 0.345798  | H | -0.024193 | -1.474318 | 5.049811  |
| H | 1.138213   | 3.39319   | -0.490888 | H | -0.180406 | -7.313844 | 2.107029  |
| H | 3.581516   | 3.30633   | -0.478224 | H | -0.180406 | -7.313844 | -2.107029 |
| H | 3.581498   | -3.306309 | 0.47818   | H | -0.246736 | -8.312048 | 0         |
| C | 1.630338   | -2.435828 | 0.352273  |   |           |           |           |
| H | 1.138194   | -3.39316  | 0.490806  |   |           |           |           |
| C | 14.179438  | 1.252624  | -0.176363 |   |           |           |           |
| C | 12.817171  | 1.573291  | -0.221578 |   |           |           |           |
| C | 14.179425  | -1.252671 | 0.176541  |   |           |           |           |
| C | 11.713466  | 0.737805  | -0.104023 |   |           |           |           |
| C | 12.817159  | -1.57333  | 0.221723  |   |           |           |           |
| C | 11.713458  | -0.737835 | 0.104143  |   |           |           |           |

|    |            |           |           |
|----|------------|-----------|-----------|
| H  | 14.863675  | 2.088314  | -0.29384  |
| H  | 12.59284   | 2.628074  | -0.369973 |
| H  | 14.863656  | -2.088363 | 0.294034  |
| H  | 12.592815  | -2.628111 | 0.370112  |
| C  | 10.349769  | 1.152781  | -0.16269  |
| C  | 9.534317   | -0.000008 | 0.000035  |
| C  | 10.349761  | -1.152802 | 0.162778  |
| C  | 8.344956   | 2.442588  | -0.345542 |
| C  | 9.718274   | 2.402042  | -0.339078 |
| C  | 8.344935   | -2.442599 | 0.34558   |
| C  | 9.718253   | -2.402061 | 0.339149  |
| H  | 7.850851   | 3.39977   | -0.481289 |
| H  | 10.28847   | 3.317145  | -0.468031 |
| H  | 7.850822   | -3.399778 | 0.481313  |
| H  | 10.288441  | -3.317168 | 0.468114  |
| H  | 15.861513  | -0.000028 | 0.000109  |
| C  | -8.59539   | 1.151283  | 0.445256  |
| N  | -5.752066  | -1.881284 | -0.0605   |
| C  | -13.276165 | -0.000068 | 0.000329  |
| H  | -14.359773 | -0.000084 | 0.000397  |
| C  | -8.595412  | -1.151277 | -0.445212 |
| C  | -7.864663  | 0         | 0.000008  |
| H  | -12.803935 | -1.785874 | -1.238948 |
| H  | -12.803834 | 1.785753  | 1.239538  |
| C  | -3.952052  | 0.000016  | -0.000124 |
| C  | 14.773503  | -0.000023 | 0.000096  |
| H  | -7.055767  | 4.931428  | 0.602902  |
| H  | -4.392803  | 4.943755  | -0.058168 |
| H  | -7.055724  | -4.931401 | -0.603203 |
| H  | -4.39278   | -4.94373  | 0.057882  |
| Ni | -5.841231  | 0.000006  | -0.000025 |

**P<sub>N</sub>-N-3A-N**

**Mg-P<sub>N</sub>-N-3A-N**

|   |   |           |           |   |           |            |           |
|---|---|-----------|-----------|---|-----------|------------|-----------|
| C | 0 | 4.147011  | 7.999241  | C | -0.001926 | -7.824381  | 4.179124  |
| C | 0 | 4.144812  | 6.647741  | C | -0.000812 | -6.46209   | 4.179803  |
| C | 0 | 2.739169  | 8.412368  | C | -0.001115 | -8.257876  | 2.785808  |
| C | 0 | -0.688436 | 11.468001 | C | -0.004377 | -11.311933 | -0.684495 |
| C | 0 | 0.688436  | 11.468001 | C | -0.004377 | -11.311933 | 0.684495  |
| C | 0 | 1.128138  | 10.104275 | C | -0.001912 | -9.925791  | 1.109909  |
| C | 0 | -4.144812 | 6.647741  | C | -0.000812 | -6.46209   | -4.179803 |
| C | 0 | -4.147011 | 7.999241  | C | -0.001926 | -7.824381  | -4.179124 |

|   |   |           |           |   |           |            |           |
|---|---|-----------|-----------|---|-----------|------------|-----------|
| C | 0 | -2.732629 | 6.244107  | C | 0.000683  | -6.032823  | -2.784226 |
| C | 0 | -2.739169 | 8.412368  | C | -0.001115 | -8.257876  | -2.785808 |
| C | 0 | -0.724691 | 3.121824  | C | 0.002033  | -2.926134  | -0.725703 |
| C | 0 | 0.724691  | 3.121824  | C | 0.002033  | -2.926134  | 0.725703  |
| C | 0 | -1.147142 | 4.526089  | C | 0.002404  | -4.342232  | -1.127071 |
| C | 0 | 1.147142  | 4.526089  | C | 0.002404  | -4.342232  | 1.127071  |
| C | 0 | 2.732629  | 6.244107  | C | 0.000683  | -6.032823  | 2.784226  |
| C | 0 | -1.128138 | 10.104275 | C | -0.001912 | -9.925791  | -1.109909 |
| N | 0 | 0         | 9.322696  | N | -0.000144 | -9.124102  | 0         |
| N | 0 | 1.906632  | 7.308668  | N | 0.000491  | -7.132741  | 1.984714  |
| N | 0 | -1.906632 | 7.308668  | N | 0.000491  | -7.132741  | -1.984714 |
| H | 0 | 0         | 8.311017  | N | -0.002096 | -9.526957  | 2.396141  |
| H | 0 | 0         | 6.300609  | N | 0.001691  | -4.745791  | 2.395404  |
| N | 0 | 2.398622  | 9.6902    | N | 0.001691  | -4.745791  | -2.395404 |
| N | 0 | 2.391756  | 4.936697  | N | -0.002096 | -9.526957  | -2.396141 |
| N | 0 | -2.391756 | 4.936697  | C | 0.0016    | -1.878871  | -1.593265 |
| N | 0 | -2.398622 | 9.6902    | C | 0.00128   | -0.466351  | -1.31665  |
| C | 0 | -1.59345  | 2.074017  | C | 0.001168  | 0.152747   | 0         |
| C | 0 | -1.317146 | 0.663007  | C | 0.00128   | -0.466351  | 1.31665   |
| C | 0 | 0         | 0.043649  | C | 0.0016    | -1.878871  | 1.593265  |
| C | 0 | 1.317146  | 0.663007  | H | 0.001523  | -2.154703  | 2.645437  |
| C | 0 | 1.59345   | 2.074017  | H | 0.001523  | -2.154703  | -2.645437 |
| H | 0 | 2.645141  | 2.351517  | H | -0.003305 | -8.500427  | -5.022784 |
| H | 0 | -2.645141 | 2.351517  | H | -0.001082 | -5.785962  | -5.023217 |
| H | 0 | -4.979359 | 8.688904  | H | -0.006141 | -12.156674 | -1.359002 |
| H | 0 | -4.974837 | 5.955106  | H | -0.006141 | -12.156674 | 1.359002  |
| H | 0 | -1.361458 | 12.312875 | H | -0.003305 | -8.500427  | 5.022784  |
| H | 0 | 1.361458  | 12.312875 | H | -0.001082 | -5.785962  | 5.023217  |
| H | 0 | 4.979359  | 8.688904  | N | 0.003166  | -5.118826  | 0         |
| H | 0 | 4.974837  | 5.955106  | C | -0.000236 | 6.884186   | 0         |
| N | 0 | 0         | 5.283712  | C | -0.000128 | 6.249754   | -1.317829 |
| C | 0 | 0         | -6.686192 | C | 0.000124  | 4.859081   | -1.583799 |
| C | 0 | -1.31798  | -6.051629 | C | -0.000128 | 6.249754   | 1.317829  |
| C | 0 | -1.584058 | -4.661598 | C | 0.000344  | 3.777053   | -0.724433 |
| C | 0 | 1.31798   | -6.051629 | C | 0.000124  | 4.859081   | 1.583799  |
| C | 0 | -0.724313 | -3.579112 | C | 0.000344  | 3.777053   | 0.724433  |
| C | 0 | 1.584058  | -4.661598 | H | 0.000161  | 4.609445   | -2.643127 |
| C | 0 | 0.724313  | -3.579112 | H | 0.000161  | 4.609445   | 2.643127  |
| H | 0 | -2.643306 | -4.411837 | C | 0.000631  | 2.382471   | -1.160593 |
| H | 0 | 2.643306  | -4.411837 | C | 0.000831  | 1.55919    | 0         |
| C | 0 | -1.160812 | -2.185381 | C | 0.000631  | 2.382471   | 1.160593  |
| C | 0 | 0         | -1.361579 | C | 0.001049  | 0.370892   | -2.451768 |



|   |   |           |            |    |           |           |           |
|---|---|-----------|------------|----|-----------|-----------|-----------|
| C | 0 | 1.160812  | -2.185381  | C  | 0.000742  | 1.7694    | -2.402577 |
| C | 0 | -2.452509 | -0.174098  | C  | 0.000742  | 1.7694    | 2.402577  |
| C | 0 | -2.402961 | -1.572455  | H  | 0.001126  | -0.111689 | -3.424533 |
| C | 0 | 2.402961  | -1.572455  | H  | 0.000595  | 2.338809  | -3.327301 |
| H | 0 | -3.425245 | 0.308433   | H  | 0.000595  | 2.338809  | 3.327301  |
| H | 0 | -3.327583 | -2.141926  | C  | 0.001049  | 0.370892  | 2.451768  |
| H | 0 | 3.327583  | -2.141926  | H  | 0.001126  | -0.111689 | 3.424533  |
| C | 0 | 2.452509  | -0.174098  | C  | -0.001231 | 12.933542 | -1.258297 |
| H | 0 | 3.425245  | 0.308433   | C  | -0.001025 | 11.625897 | -1.589392 |
| C | 0 | -1.258135 | -12.734707 | C  | -0.001231 | 12.933542 | 1.258297  |
| C | 0 | -1.589343 | -11.426814 | C  | -0.000839 | 10.468417 | -0.708073 |
| C | 0 | 1.258135  | -12.734707 | C  | -0.001025 | 11.625897 | 1.589392  |
| C | 0 | -0.708657 | -10.269611 | C  | -0.000839 | 10.468417 | 0.708073  |
| C | 0 | 1.589343  | -11.426814 | H  | -0.001506 | 14.536563 | 0         |
| C | 0 | 0.708657  | -10.269611 | H  | -0.001347 | 13.670341 | -2.055652 |
| H | 0 | 0         | -14.337447 | H  | -0.000992 | 11.42058  | -2.655208 |
| H | 0 | -2.055471 | -13.471466 | H  | -0.001347 | 13.670341 | 2.055652  |
| H | 0 | -2.655193 | -11.22178  | H  | -0.000992 | 11.42058  | 2.655208  |
| H | 0 | 2.055471  | -13.471466 | C  | -0.000614 | 9.112526  | -1.15627  |
| H | 0 | 2.655193  | -11.22178  | C  | -0.000472 | 8.269928  | 0         |
| C | 0 | -1.156436 | -8.914315  | C  | -0.000614 | 9.112526  | 1.15627   |
| C | 0 | 0         | -8.071643  | C  | -0.00028  | 7.100525  | -2.460855 |
| C | 0 | 1.156436  | -8.914315  | C  | -0.000514 | 8.488298  | -2.408112 |
| C | 0 | -2.461334 | -6.902635  | C  | -0.00028  | 7.100525  | 2.460855  |
| C | 0 | -2.408609 | -8.290021  | C  | -0.000514 | 8.488298  | 2.408112  |
| C | 0 | 2.461334  | -6.902635  | H  | -0.000201 | 6.618433  | -3.434313 |
| C | 0 | 2.408609  | -8.290021  | H  | -0.000613 | 9.05912   | -3.332712 |
| H | 0 | -3.434706 | -6.420433  | H  | -0.000201 | 6.618433  | 3.434313  |
| H | 0 | -3.333105 | -8.860958  | H  | -0.000613 | 9.05912   | 3.332712  |
| H | 0 | 3.434706  | -6.420433  | N  | -0.001318 | 13.530451 | 0         |
| H | 0 | 3.333105  | -8.860958  | Mg | 0.003983  | -7.132976 | 0         |

**Zn-P<sub>N</sub>-N-3A-N**

|   |           |            |           |
|---|-----------|------------|-----------|
| C | 0.017311  | -7.498767  | 4.161451  |
| C | 0.010793  | -6.138241  | 4.162361  |
| C | 0.009403  | -7.930409  | 2.769397  |
| C | 0.036068  | -10.981329 | -0.683723 |
| C | 0.036068  | -10.981329 | 0.683723  |
| C | 0.017837  | -9.595819  | 1.107332  |
| C | 0.010793  | -6.138241  | -4.162361 |
| C | 0.017311  | -7.498767  | -4.161451 |
| C | -0.001304 | -5.710321  | -2.76824  |

**Ni-P<sub>N</sub>-N-3A-N**

|   |   |           |           |
|---|---|-----------|-----------|
| C | 0 | 4.110907  | 7.493695  |
| C | 0 | 4.109472  | 6.138793  |
| C | 0 | 2.724899  | 7.914498  |
| C | 0 | -0.679988 | 10.908945 |
| C | 0 | 0.679988  | 10.908945 |
| C | 0 | 1.094938  | 9.529389  |
| C | 0 | -4.109472 | 6.138793  |
| C | 0 | -4.110907 | 7.493695  |
| C | 0 | -2.720465 | 5.724039  |

|   |           |            |           |   |   |           |           |
|---|-----------|------------|-----------|---|---|-----------|-----------|
| C | 0.009403  | -7.930409  | -2.769397 | C | 0 | -2.724899 | 7.914498  |
| C | -0.0072   | -2.610767  | -0.724367 | C | 0 | -0.718308 | 2.673487  |
| C | -0.0072   | -2.610767  | 0.724367  | C | 0 | 0.718308  | 2.673487  |
| C | -0.008922 | -4.026726  | -1.122445 | C | 0 | -1.108911 | 4.083888  |
| C | -0.008922 | -4.026726  | 1.122445  | C | 0 | 1.108911  | 4.083888  |
| C | -0.001304 | -5.710321  | 2.76824   | C | 0 | 2.720465  | 5.724039  |
| C | 0.017837  | -9.595819  | -1.107332 | C | 0 | -1.094938 | 9.529389  |
| N | 0.006869  | -8.790657  | 0         | N | 0 | 0         | 8.690421  |
| N | -0.002156 | -6.80763   | 1.962654  | N | 0 | 1.887346  | 6.808887  |
| N | -0.002156 | -6.80763   | -1.962654 | N | 0 | -1.887346 | 6.808887  |
| N | 0.017777  | -9.199714  | 2.390132  | N | 0 | 2.377136  | 9.181547  |
| N | -0.005742 | -4.424862  | 2.389366  | N | 0 | 2.374805  | 4.442483  |
| N | -0.005742 | -4.424862  | -2.389366 | N | 0 | -2.374805 | 4.442483  |
| N | 0.017777  | -9.199714  | -2.390132 | N | 0 | -2.377136 | 9.181547  |
| C | -0.005379 | -1.564854  | -1.59336  | C | 0 | -1.593615 | 1.631618  |
| C | -0.00401  | -0.152321  | -1.31678  | C | 0 | -1.31722  | 0.220072  |
| C | -0.003511 | 0.466716   | 0         | C | 0 | 0         | -0.399297 |
| C | -0.00401  | -0.152321  | 1.31678   | C | 0 | 1.31722   | 0.220072  |
| C | -0.005379 | -1.564854  | 1.59336   | C | 0 | 1.593615  | 1.631618  |
| H | -0.005112 | -1.841069  | 2.645385  | H | 0 | 2.644466  | 1.910166  |
| H | -0.005112 | -1.841069  | -2.645385 | H | 0 | -2.644466 | 1.910166  |
| H | 0.028372  | -8.178239  | -5.002117 | H | 0 | -4.939992 | 8.186552  |
| H | 0.015303  | -5.458911  | -5.00303  | H | 0 | -4.936551 | 5.443693  |
| H | 0.04894   | -11.823789 | -1.360802 | H | 0 | -1.373176 | 11.737584 |
| H | 0.04894   | -11.823789 | 1.360802  | H | 0 | 1.373176  | 11.737584 |
| H | 0.028372  | -8.178239  | 5.002117  | H | 0 | 4.939992  | 8.186552  |
| H | 0.015303  | -5.458911  | 5.00303   | H | 0 | 4.936551  | 5.443693  |
| N | -0.01041  | -4.80909   | 0         | N | 0 | 0         | 4.901834  |
| C | 0.001667  | 7.198163   | 0         | C | 0 | 0         | -7.130185 |
| C | 0.001246  | 6.563717   | -1.317834 | C | 0 | -1.317874 | -6.495573 |
| C | 0.00028   | 5.173068   | -1.583798 | C | 0 | -1.583838 | -5.105418 |
| C | 0.001246  | 6.563717   | 1.317834  | C | 0 | 1.317874  | -6.495573 |
| C | -0.00049  | 4.091016   | -0.724422 | C | 0 | -0.724428 | -4.022799 |
| C | 0.00028   | 5.173068   | 1.583798  | C | 0 | 1.583838  | -5.105418 |
| C | -0.00049  | 4.091016   | 0.724422  | C | 0 | 0.724428  | -4.022799 |
| H | 0.000091  | 4.923428   | -2.643125 | H | 0 | -2.643163 | -4.855759 |
| H | 0.000091  | 4.923428   | 2.643125  | H | 0 | 2.643163  | -4.855759 |
| C | -0.001568 | 2.696451   | -1.1606   | C | 0 | -1.160697 | -2.628873 |
| C | -0.00227  | 1.873138   | 0         | C | 0 | 0         | -1.805301 |
| C | -0.001568 | 2.696451   | 1.1606    | C | 0 | 1.160697  | -2.628873 |
| C | -0.003147 | 0.684911   | -2.451846 | C | 0 | -2.452519 | -0.617503 |
| C | -0.001971 | 2.083426   | -2.402584 | C | 0 | -2.402833 | -2.015705 |

|    |           |           |           |    |   |           |            |
|----|-----------|-----------|-----------|----|---|-----------|------------|
| C  | -0.001971 | 2.083426  | 2.402584  | C  | 0 | 2.402833  | -2.015705  |
| H  | -0.003468 | 0.202372  | -3.424633 | H  | 0 | -3.425288 | -0.134962  |
| H  | -0.001404 | 2.652879  | -3.327282 | H  | 0 | -3.327434 | -2.585346  |
| H  | -0.001404 | 2.652879  | 3.327282  | H  | 0 | 3.327434  | -2.585346  |
| C  | -0.003147 | 0.684911  | 2.451846  | C  | 0 | 2.452519  | -0.617503  |
| H  | -0.003468 | 0.202372  | 3.424633  | H  | 0 | 3.425288  | -0.134962  |
| C  | 0.005222  | 13.2475   | -1.258297 | C  | 0 | -1.258254 | -13.179114 |
| C  | 0.004585  | 11.939855 | -1.589394 | C  | 0 | -1.589379 | -11.871358 |
| C  | 0.005222  | 13.2475   | 1.258297  | C  | 0 | 1.258254  | -13.179114 |
| C  | 0.003898  | 10.782369 | -0.708084 | C  | 0 | -0.708424 | -10.713907 |
| C  | 0.004585  | 11.939855 | 1.589394  | C  | 0 | 1.589379  | -11.871358 |
| C  | 0.003898  | 10.782369 | 0.708084  | C  | 0 | 0.708424  | -10.713907 |
| H  | 0.005814  | 14.85052  | 0         | H  | 0 | 0         | -14.781976 |
| H  | 0.005656  | 13.984301 | -2.055652 | H  | 0 | -2.055665 | -13.915954 |
| H  | 0.004573  | 11.734542 | -2.655211 | H  | 0 | -2.655234 | -11.666174 |
| H  | 0.005656  | 13.984301 | 2.055652  | H  | 0 | 2.055665  | -13.915954 |
| H  | 0.004573  | 11.734542 | 2.655211  | H  | 0 | 2.655234  | -11.666174 |
| C  | 0.00307   | 9.426502  | -1.156274 | C  | 0 | -1.15638  | -9.358525  |
| C  | 0.002545  | 8.583896  | 0         | C  | 0 | 0         | -8.515844  |
| C  | 0.00307   | 9.426502  | 1.156274  | C  | 0 | 1.15638   | -9.358525  |
| C  | 0.001801  | 7.414502  | -2.46087  | C  | 0 | -2.461231 | -7.34665   |
| C  | 0.002691  | 8.802261  | -2.408124 | C  | 0 | -2.408493 | -8.734028  |
| C  | 0.001801  | 7.414502  | 2.46087   | C  | 0 | 2.461231  | -7.34665   |
| C  | 0.002691  | 8.802261  | 2.408124  | C  | 0 | 2.408493  | -8.734028  |
| H  | 0.001484  | 6.932406  | -3.434327 | H  | 0 | -3.43462  | -6.864411  |
| H  | 0.003052  | 9.373086  | -3.332722 | H  | 0 | -3.333064 | -9.304913  |
| H  | 0.001484  | 6.932406  | 3.434327  | H  | 0 | 3.43462   | -6.864411  |
| H  | 0.003052  | 9.373086  | 3.332722  | H  | 0 | 3.333064  | -9.304913  |
| N  | 0.005448  | 13.844409 | 0         | N  | 0 | 0         | -13.775852 |
| Zn | -0.043519 | -6.819935 | 0         | Ni | 0 | 0         | 6.802196   |

**P<sub>N</sub>-N-3A**

**Mg-P<sub>N</sub>-N-3A**

|   |           |            |           |   |            |           |           |
|---|-----------|------------|-----------|---|------------|-----------|-----------|
| C | -0.111339 | -7.900512  | 4.206268  | C | -7.781377  | -4.193992 | 0.157523  |
| C | 0.147133  | -6.572455  | 4.217924  | C | -6.427715  | -4.200761 | 0.005753  |
| C | -0.20371  | -8.281294  | 2.787256  | C | -8.207018  | -2.795755 | 0.125478  |
| C | -0.795249 | -11.251329 | -0.681164 | C | -11.241385 | 0.68068   | 0.5726    |
| C | -0.795249 | -11.251329 | 0.681164  | C | -11.241377 | -0.680703 | 0.572593  |
| C | -0.559955 | -9.894898  | 1.135578  | C | -9.867773  | -1.115672 | 0.314005  |
| C | 0.147133  | -6.572455  | -4.217924 | C | -6.427767  | 4.200774  | 0.005581  |
| C | -0.111339 | -7.900512  | -4.206268 | C | -7.781408  | 4.19399   | 0.157458  |
| C | 0.224619  | -6.155065  | -2.807867 | C | -5.992377  | 2.809675  | -0.128829 |
| C | -0.20371  | -8.281294  | -2.787256 | C | -8.20703   | 2.795732  | 0.125528  |

|   |           |            |           |   |            |           |           |
|---|-----------|------------|-----------|---|------------|-----------|-----------|
| C | 0.448886  | -3.144135  | -0.727437 | C | -2.91166   | 0.731099  | -0.283608 |
| C | 0.448886  | -3.144135  | 0.727437  | C | -2.911658  | -0.731072 | -0.283615 |
| C | 0.520862  | -4.54305   | -1.155784 | C | -4.324646  | 1.146504  | -0.333037 |
| C | 0.520862  | -4.54305   | 1.155784  | C | -4.324639  | -1.146479 | -0.333067 |
| C | 0.224619  | -6.155065  | 2.807867  | C | -5.992367  | -2.809684 | -0.128905 |
| C | -0.559955 | -9.894898  | -1.135578 | C | -9.867776  | 1.115663  | 0.314038  |
| N | -0.435349 | -9.117535  | 0         | N | -9.090562  | 0.000011  | 0.146018  |
| N | 0.006379  | -7.224702  | 1.979217  | N | -7.113442  | -2.007161 | -0.062518 |
| N | 0.006379  | -7.224702  | -1.979217 | N | -7.113438  | 2.007136  | -0.062281 |
| H | -0.298281 | -8.111474  | 0         | N | -9.481469  | -2.395285 | 0.289837  |
| H | 0.789681  | -6.393322  | 0         | N | -4.712429  | -2.444069 | -0.241779 |
| N | -0.47123  | -9.54387   | 2.406143  | N | -4.712449  | 2.444082  | -0.241742 |
| N | 0.433623  | -4.891292  | 2.454365  | N | -9.481489  | 2.395282  | 0.289869  |
| N | 0.433623  | -4.891292  | -2.454365 | C | -1.842372  | 1.585264  | -0.229407 |
| N | -0.47123  | -9.54387   | -2.406143 | C | -0.443972  | 1.30707   | -0.189504 |
| C | 0.371092  | -2.079919  | -1.585546 | C | 0.17804    | 0.000007  | -0.173389 |
| C | 0.308874  | -0.68299   | -1.307536 | C | -0.443973  | -1.307057 | -0.189511 |
| C | 0.281423  | -0.06237   | 0         | C | -1.842376  | -1.585244 | -0.229422 |
| C | 0.308874  | -0.68299   | 1.307536  | H | -2.115131  | -2.638722 | -0.220283 |
| C | 0.371092  | -2.079919  | 1.585546  | H | -2.115122  | 2.638743  | -0.220253 |
| H | 0.363237  | -2.356971  | 2.637587  | H | -8.450721  | 5.031971  | 0.295473  |
| H | 0.363237  | -2.356971  | -2.637587 | H | -5.756259  | 5.048532  | -0.008926 |
| H | -0.247367 | -8.582362  | -5.034597 | H | -12.068385 | 1.356195  | 0.742653  |
| H | 0.284379  | -5.907384  | -5.059709 | H | -12.068374 | -1.356224 | 0.742639  |
| H | -0.928848 | -12.081691 | -1.359377 | H | -8.450694  | -5.031953 | 0.295628  |
| H | -0.928848 | -12.081691 | 1.359377  | H | -5.75616   | -5.048484 | -0.00858  |
| H | -0.247367 | -8.582362  | 5.034597  | C | 6.88767    | 0         | 0.023471  |
| H | 0.284379  | -5.907384  | 5.059709  | C | 6.265853   | 1.304969  | 0.005016  |
| C | -0.034046 | 6.642317   | 0         | C | 4.8735     | 1.579701  | -0.035814 |
| C | -0.004069 | 6.021216   | -1.305128 | C | 6.265851   | -1.304966 | 0.005009  |
| C | 0.062104  | 4.629628   | -1.579767 | C | 3.783663   | 0.739017  | -0.067423 |
| C | -0.004069 | 6.021216   | 1.305128  | C | 4.873496   | -1.579696 | -0.035821 |
| C | 0.11295   | 3.540705   | -0.739223 | C | 3.783662   | -0.73901  | -0.067425 |
| C | 0.062104  | 4.629628   | 1.579767  | H | 4.63289    | 2.641055  | -0.042931 |
| C | 0.11295   | 3.540705   | 0.739223  | H | 4.632885   | -2.641049 | -0.042943 |
| H | 0.073686  | 4.389258   | -2.641161 | C | 2.408675   | 1.162409  | -0.107209 |
| H | 0.073686  | 4.389258   | 2.641161  | C | 1.593746   | 0.000006  | -0.131521 |
| C | 0.176947  | 2.166772   | -1.162814 | C | 2.408671   | -1.1624   | -0.107213 |
| C | 0.215184  | 1.352647   | 0         | C | 0.402846   | 2.461202  | -0.16212  |
| C | 0.176947  | 2.166772   | 1.162814  | C | 1.782484   | 2.416948  | -0.123034 |
| C | 0.267772  | 0.162776   | -2.462194 | C | 1.78248    | -2.416937 | -0.123042 |
| C | 0.204511  | 1.541234   | -2.417793 | H | -0.089675  | 3.42832   | -0.174163 |

|   |           |           |           |    |           |           |           |
|---|-----------|-----------|-----------|----|-----------|-----------|-----------|
| C | 0.204511  | 1.541234  | 2.417793  | H  | 2.352039  | 3.341748  | -0.104857 |
| H | 0.288828  | -0.329686 | -3.429177 | H  | 2.352033  | -3.341737 | -0.104867 |
| H | 0.176762  | 2.110659  | -3.34236  | C  | 0.40284   | -2.46119  | -0.162129 |
| H | 0.176762  | 2.110659  | 3.34236   | H  | -0.089681 | -3.428308 | -0.174176 |
| C | 0.267772  | 0.162776  | 2.462194  | C  | 12.946883 | 1.265091  | 0.202016  |
| H | 0.288828  | -0.329686 | 3.429177  | C  | 11.584945 | 1.588922  | 0.161664  |
| C | -0.325312 | 12.697255 | -1.265187 | C  | 12.946881 | -1.2651   | 0.202008  |
| C | -0.259354 | 11.33617  | -1.588952 | C  | 10.481746 | 0.745633  | 0.129312  |
| C | -0.325312 | 12.697255 | 1.265187  | C  | 11.584942 | -1.588929 | 0.161654  |
| C | -0.206468 | 10.233878 | -0.745762 | C  | 10.481745 | -0.745639 | 0.129307  |
| C | -0.259354 | 11.33617  | 1.588952  | H  | 14.627964 | -0.000006 | 0.251968  |
| C | -0.206468 | 10.233878 | 0.745762  | H  | 13.630869 | 2.108963  | 0.222149  |
| H | -0.406965 | 14.376936 | 0         | H  | 11.360905 | 2.654195  | 0.154903  |
| H | -0.358246 | 13.380765 | -2.109028 | H  | 13.630867 | -2.108972 | 0.222135  |
| H | -0.248335 | 11.112273 | -2.654235 | H  | 11.360902 | -2.654202 | 0.154886  |
| H | -0.358246 | 13.380765 | 2.109028  | C  | 9.118822  | 1.164475  | 0.089154  |
| H | -0.248335 | 11.112273 | 2.654235  | C  | 8.303846  | -0.000001 | 0.06525   |
| C | -0.140947 | 8.871944  | -1.164609 | C  | 9.11882   | -1.164478 | 0.089147  |
| C | -0.101992 | 8.057555  | 0         | C  | 7.114721  | 2.467017  | 0.029681  |
| C | -0.140947 | 8.871944  | 1.164609  | C  | 8.487188  | 2.426386  | 0.070255  |
| C | -0.044146 | 6.86936   | -2.467124 | C  | 7.114716  | -2.467016 | 0.029667  |
| C | -0.110167 | 8.240872  | -2.426599 | C  | 8.487184  | -2.426388 | 0.07024   |
| C | -0.044146 | 6.86936   | 2.467124  | H  | 6.620602  | 3.433716  | 0.014768  |
| C | -0.110167 | 8.240872  | 2.426599  | H  | 9.057043  | 3.350553  | 0.086833  |
| H | -0.01991  | 6.375547  | -3.433816 | H  | 6.620596  | -3.433714 | 0.014747  |
| H | -0.137156 | 8.810386  | -3.35072  | H  | 9.057037  | -3.350556 | 0.086812  |
| H | -0.01991  | 6.375547  | 3.433816  | C  | -5.134133 | 0.000016  | -0.429386 |
| H | -0.137156 | 8.810386  | 3.35072   | C  | 13.540369 | -0.000005 | 0.219776  |
| C | 0.641378  | -5.334736 | 0         | Mg | -7.149034 | -0.000041 | -0.239831 |
| C | -0.354325 | 13.290117 | 0         |    |           |           |           |

**Zn-P<sub>N</sub>-N-3A**

|   |           |            |           |
|---|-----------|------------|-----------|
| C | 0.17403   | -7.432989  | 4.208776  |
| C | 0.013927  | -6.081846  | 4.217443  |
| C | 0.198019  | -7.845019  | 2.805463  |
| C | 0.601657  | -10.844328 | -0.678979 |
| C | 0.601657  | -10.844328 | 0.678979  |
| C | 0.353847  | -9.471482  | 1.112884  |
| C | 0.013927  | -6.081846  | -4.217443 |
| C | 0.17403   | -7.432989  | -4.208776 |
| C | -0.074781 | -5.648433  | -2.82173  |
| C | 0.198019  | -7.845019  | -2.805463 |

**Ni-P<sub>N</sub>-N-3A**

|   |           |            |           |
|---|-----------|------------|-----------|
| C | 0.006381  | -7.468792  | 4.10798   |
| C | 0.006701  | -6.114397  | 4.13035   |
| C | 0.002948  | -7.866259  | 2.712917  |
| C | -0.003059 | -10.898878 | -0.676902 |
| C | -0.003059 | -10.898878 | 0.676902  |
| C | -0.002449 | -9.504938  | 1.09454   |
| C | 0.006701  | -6.114397  | -4.13035  |
| C | 0.006381  | -7.468792  | -4.10798  |
| C | 0.003442  | -5.669745  | -2.750873 |
| C | 0.002948  | -7.866259  | -2.712917 |

|   |           |            |           |   |           |            |           |
|---|-----------|------------|-----------|---|-----------|------------|-----------|
| C | -0.288609 | -2.618722  | -0.727684 | C | -0.001515 | -2.659884  | -0.722435 |
| C | -0.288609 | -2.618722  | 0.727684  | C | -0.001515 | -2.659884  | 0.722435  |
| C | -0.345416 | -4.027763  | -1.144582 | C | -0.001605 | -4.062289  | -1.131267 |
| C | -0.345416 | -4.027763  | 1.144582  | C | -0.001605 | -4.062289  | 1.131267  |
| C | -0.074781 | -5.648433  | 2.82173   | C | 0.003442  | -5.669745  | 2.750873  |
| C | 0.353847  | -9.471482  | -1.112884 | C | -0.002449 | -9.504938  | -1.09454  |
| N | 0.186513  | -8.679458  | 0         | N | -0.003274 | -8.675345  | 0         |
| N | 0.057467  | -6.75301   | 2.013975  | N | 0.002463  | -6.760301  | 1.89321   |
| N | 0.057467  | -6.75301   | -2.013975 | N | 0.002463  | -6.760301  | -1.89321  |
| N | 0.344741  | -9.114352  | 2.396793  | N | 0.000382  | -9.14873   | 2.366861  |
| N | -0.234147 | -4.381363  | 2.445344  | N | 0.001411  | -4.389782  | 2.427601  |
| N | -0.234147 | -4.381363  | -2.445344 | N | 0.001411  | -4.389782  | -2.427601 |
| N | 0.344741  | -9.114352  | -2.396793 | N | 0.000382  | -9.14873   | -2.366861 |
| C | -0.229852 | -1.552054  | -1.584853 | C | -0.000874 | -1.59517   | -1.585834 |
| C | -0.192308 | -0.153958  | -1.307257 | C | -0.000814 | -0.198065  | -1.307607 |
| C | -0.176488 | 0.46786    | 0         | C | -0.000846 | 0.424377   | 0         |
| C | -0.192308 | -0.153958  | 1.307257  | C | -0.000814 | -0.198065  | 1.307607  |
| C | -0.229852 | -1.552054  | 1.584853  | C | -0.000874 | -1.59517   | 1.585834  |
| H | -0.215936 | -1.827508  | 2.637415  | H | -0.000383 | -1.871977  | 2.637746  |
| H | -0.215936 | -1.827508  | -2.637415 | H | -0.000383 | -1.871977  | -2.637746 |
| H | 0.278484  | -8.109456  | -5.045884 | H | 0.007986  | -8.176777  | -4.924301 |
| H | -0.049948 | -5.413803  | -5.065603 | H | 0.008649  | -5.436112  | -4.97174  |
| H | 0.767515  | -11.666917 | -1.360548 | H | -0.002818 | -11.728373 | -1.369617 |
| H | 0.767515  | -11.666917 | 1.360548  | H | -0.002818 | -11.728373 | 1.369617  |
| H | 0.278484  | -8.109456  | 5.045884  | H | 0.007986  | -8.176777  | 4.924301  |
| H | -0.049948 | -5.413803  | 5.065603  | H | 0.008649  | -5.436112  | 4.97174   |
| C | 0.023516  | 7.177113   | 0         | C | -0.000168 | 7.13628    | 0         |
| C | 0.00434   | 6.555368   | -1.305023 | C | -0.00024  | 6.514102   | -1.304983 |
| C | -0.037806 | 5.16305    | -1.579729 | C | -0.000388 | 5.121493   | -1.579757 |
| C | 0.00434   | 6.555368   | 1.305023  | C | -0.00024  | 6.514102   | 1.304983  |
| C | -0.070195 | 4.073213   | -0.739075 | C | -0.000482 | 4.030744   | -0.739106 |
| C | -0.037806 | 5.16305    | 1.579729  | C | -0.000388 | 5.121493   | 1.579757  |
| C | -0.070195 | 4.073213   | 0.739075  | C | -0.000482 | 4.030744   | 0.739106  |
| H | -0.045078 | 4.922463   | -2.641096 | H | -0.000421 | 4.880826   | -2.641131 |
| H | -0.045078 | 4.922463   | 2.641096  | H | -0.000421 | 4.880826   | 2.641131  |
| C | -0.110443 | 2.698368   | -1.162565 | C | -0.000594 | 2.655873   | -1.162492 |
| C | -0.134716 | 1.883516   | 0         | C | -0.000698 | 1.840305   | 0         |
| C | -0.110443 | 2.698368   | 1.162565  | C | -0.000594 | 2.655873   | 1.162492  |
| C | -0.16534  | 0.692696   | -2.461639 | C | -0.000632 | 0.649826   | -2.462364 |
| C | -0.126497 | 2.072207   | -2.417277 | C | -0.000557 | 2.029369   | -2.41756  |
| C | -0.126497 | 2.072207   | 2.417277  | C | -0.000557 | 2.029369   | 2.41756   |
| H | -0.177235 | 0.200006   | -3.428664 | H | -0.000577 | 0.157113   | -3.429434 |

|    |           |           |           |    |           |           |           |
|----|-----------|-----------|-----------|----|-----------|-----------|-----------|
| H  | -0.108448 | 2.64189   | -3.34198  | H  | -0.000447 | 2.599547  | -3.342143 |
| H  | -0.108448 | 2.64189   | 3.34198   | H  | -0.000447 | 2.599547  | 3.342143  |
| C  | -0.16534  | 0.692696  | 2.461639  | C  | -0.000632 | 0.649826  | 2.462364  |
| H  | -0.177235 | 0.200006  | 3.428664  | H  | -0.000577 | 0.157113  | 3.429434  |
| C  | 0.210398  | 13.236083 | -1.26512  | C  | 0.00055   | 13.198027 | -1.265103 |
| C  | 0.168014  | 11.874176 | -1.588939 | C  | 0.000381  | 11.835531 | -1.588962 |
| C  | 0.210398  | 13.236083 | 1.26512   | C  | 0.00055   | 13.198027 | 1.265103  |
| C  | 0.134054  | 10.77104  | -0.745675 | C  | 0.000253  | 10.731778 | -0.745709 |
| C  | 0.168014  | 11.874176 | 1.588939  | C  | 0.000381  | 11.835531 | 1.588962  |
| C  | 0.134054  | 10.77104  | 0.745675  | C  | 0.000253  | 10.731778 | 0.745709  |
| H  | 0.2629    | 14.917048 | 0         | H  | 0.00077   | 14.879855 | 0         |
| H  | 0.231557  | 13.920048 | -2.108981 | H  | 0.000633  | 13.882329 | -2.108967 |
| H  | 0.160929  | 11.650144 | -2.654216 | H  | 0.000349  | 11.611421 | -2.654248 |
| H  | 0.231557  | 13.920048 | 2.108981  | H  | 0.000633  | 13.882329 | 2.108967  |
| H  | 0.160929  | 11.650144 | 2.654216  | H  | 0.000349  | 11.611421 | 2.654248  |
| C  | 0.092001  | 9.408196  | -1.164515 | C  | 0.000094  | 9.368422  | -1.16449  |
| C  | 0.067037  | 8.593239  | 0         | C  | -0.000002 | 8.553043  | 0         |
| C  | 0.092001  | 9.408196  | 1.164515  | C  | 0.000094  | 9.368422  | 1.16449   |
| C  | 0.029932  | 7.404201  | -2.467073 | C  | -0.000149 | 7.363539  | -2.467198 |
| C  | 0.072226  | 8.776604  | -2.426464 | C  | 0.000012  | 8.736419  | -2.426546 |
| C  | 0.029932  | 7.404201  | 2.467073  | C  | -0.000149 | 7.363539  | 2.467198  |
| C  | 0.072226  | 8.776604  | 2.426464  | C  | 0.000012  | 8.736419  | 2.426546  |
| H  | 0.014384  | 6.910084  | -3.433772 | H  | -0.000212 | 6.86915   | -3.433882 |
| H  | 0.08949   | 9.346461  | -3.350613 | H  | 0.000073  | 9.30658   | -3.350674 |
| H  | 0.014384  | 6.910084  | 3.433772  | H  | -0.000212 | 6.86915   | 3.433882  |
| H  | 0.08949   | 9.346461  | 3.350613  | H  | 0.000073  | 9.30658   | 3.350674  |
| Zn | -0.263917 | -6.768319 | 0         | C  | -0.003477 | -4.9202   | 0         |
| C  | -0.480017 | -4.844432 | 0         | C  | 0.000629  | 13.791783 | 0         |
| C  | 0.229063  | 13.829499 | 0         | Ni | -0.004448 | -6.766805 | 0         |

**PcN-3A-N**

**Mg-PcN-3A-N**

|   |          |           |           |   |           |           |           |
|---|----------|-----------|-----------|---|-----------|-----------|-----------|
| C | 0.000022 | -6.413568 | 4.171597  | C | 0.000456  | -6.301862 | 4.196778  |
| C | 0.000061 | -5.009486 | 4.168689  | C | -0.00042  | -4.889401 | 4.194711  |
| C | 0.00015  | -6.813745 | 2.760726  | C | -0.000315 | -6.723612 | 2.797098  |
| C | 0.000121 | -9.888105 | -0.708301 | C | 0.002189  | -9.790765 | -0.707308 |
| C | 0.000121 | -9.888105 | 0.708301  | C | 0.002189  | -9.790765 | 0.707308  |
| C | 0.000097 | -8.508166 | 1.144173  | C | -0.000129 | -8.393501 | 1.122992  |
| C | 0.000061 | -5.009486 | -4.168689 | C | -0.00042  | -4.889401 | -4.194711 |
| C | 0.000022 | -6.413568 | -4.171597 | C | 0.000456  | -6.301862 | -4.196778 |
| C | 0.000213 | -4.618277 | -2.754658 | C | -0.001751 | -4.473981 | -2.792335 |
| C | 0.00015  | -6.813745 | -2.760726 | C | -0.000315 | -6.723612 | -2.797098 |

|   |           |           |           |   |           |           |           |
|---|-----------|-----------|-----------|---|-----------|-----------|-----------|
| C | 0.000165  | -1.513683 | -0.724754 | C | -0.002888 | -1.381541 | -0.725376 |
| C | 0.000165  | -1.513683 | 0.724754  | C | -0.002888 | -1.381541 | 0.725376  |
| C | 0.000189  | -2.914427 | -1.146485 | C | -0.003504 | -2.794228 | -1.124772 |
| C | 0.000189  | -2.914427 | 1.146485  | C | -0.003504 | -2.794228 | 1.124772  |
| C | 0.000213  | -4.618277 | 2.754658  | C | -0.001751 | -4.473981 | 2.792335  |
| C | 0.000097  | -8.508166 | -1.144173 | C | -0.000129 | -8.393501 | -1.122992 |
| N | 0.000046  | -7.742844 | 0         | N | -0.001933 | -7.604721 | 0         |
| N | 0.000151  | -5.706621 | 1.944267  | N | -0.001546 | -5.593395 | 2.006086  |
| N | 0.000151  | -5.706621 | -1.944267 | N | -0.001546 | -5.593395 | -2.006086 |
| H | 0.000066  | -6.729733 | 0         | N | 0.00024   | -7.989918 | 2.398491  |
| N | 0.000115  | -8.09224  | 2.401064  | N | -0.002715 | -3.198742 | 2.394074  |
| N | 0.000208  | -3.325355 | 2.393874  | N | -0.002715 | -3.198742 | -2.394074 |
| N | 0.000208  | -3.325355 | -2.393874 | N | 0.00024   | -7.989918 | -2.398491 |
| N | 0.000115  | -8.09224  | -2.401064 | C | -0.002316 | -0.331773 | -1.592673 |
| C | 0.000137  | -0.462733 | -1.592885 | C | -0.001811 | 1.078944  | -1.316701 |
| C | 0.000102  | 0.94626   | -1.317276 | C | -0.001617 | 1.698669  | 0         |
| C | 0.000092  | 1.56638   | 0         | C | -0.001811 | 1.078944  | 1.316701  |
| C | 0.000102  | 0.94626   | 1.317276  | C | -0.002316 | -0.331773 | 1.592673  |
| C | 0.000137  | -0.462733 | 1.592885  | H | -0.002283 | -0.606869 | 2.644926  |
| H | 0.000128  | -0.739265 | 2.644559  | H | -0.002283 | -0.606869 | -2.644926 |
| H | 0.000128  | -0.739265 | -2.644559 | C | 0.000468  | 8.429561  | 0         |
| C | -0.000218 | 8.295447  | 0         | C | 0.00029   | 7.794735  | -1.317842 |
| C | -0.000205 | 7.660425  | -1.317992 | C | -0.000107 | 6.405063  | -1.583749 |
| C | -0.000133 | 6.271605  | -1.584056 | C | 0.00029   | 7.794735  | 1.317842  |
| C | -0.000205 | 7.660425  | 1.317992  | C | -0.00042  | 5.321754  | -0.724482 |
| C | -0.000063 | 5.187635  | -0.7244   | C | -0.000107 | 6.405063  | 1.583749  |
| C | -0.000133 | 6.271605  | 1.584056  | C | -0.00042  | 5.321754  | 0.724482  |
| C | -0.000063 | 5.187635  | 0.7244    | H | -0.000183 | 6.155389  | -2.643107 |
| H | -0.000136 | 6.021795  | -2.643336 | H | -0.000183 | 6.155389  | 2.643107  |
| H | -0.000136 | 6.021795  | 2.643336  | C | -0.000849 | 3.928519  | -1.160628 |
| C | 0.000015  | 3.795457  | -1.160915 | C | -0.001126 | 3.105028  | 0         |
| C | 0.00006   | 2.971406  | 0         | C | -0.000849 | 3.928519  | 1.160628  |
| C | 0.000015  | 3.795457  | 1.160915  | C | -0.001489 | 1.917301  | -2.452762 |
| C | 0.000074  | 1.784567  | -2.453662 | C | -0.001028 | 3.314694  | -2.403173 |
| C | 0.000025  | 3.181714  | -2.40369  | C | -0.001028 | 3.314694  | 2.403173  |
| C | 0.000025  | 3.181714  | 2.40369   | H | -0.001626 | 1.434509  | -3.425432 |
| H | 0.000081  | 1.301852  | -3.426318 | H | -0.000817 | 3.884477  | -3.327747 |
| H | 0.000001  | 3.751565  | -3.328153 | H | -0.000817 | 3.884477  | 3.327747  |
| H | 0.000001  | 3.751565  | 3.328153  | C | -0.001489 | 1.917301  | 2.452762  |
| C | 0.000074  | 1.784567  | 2.453662  | H | -0.001626 | 1.434509  | 3.425432  |
| H | 0.000081  | 1.301852  | 3.426318  | C | 0.002133  | 14.478338 | -1.258363 |
| C | 0.000563  | 14.34324  | -1.258093 | C | 0.001724  | 13.170527 | -1.589411 |



|   |           |            |           |   |           |            |           |
|---|-----------|------------|-----------|---|-----------|------------|-----------|
| C | -0.000549 | 13.035131  | -1.589297 | C | 0.002133  | 14.478338  | 1.258363  |
| C | 0.000563  | 14.34324   | 1.258093  | C | 0.001438  | 12.012972  | -0.708707 |
| C | -0.0004   | 11.877856  | -0.709431 | C | 0.001724  | 13.170527  | 1.589411  |
| C | -0.000549 | 13.035131  | 1.589297  | C | 0.001438  | 12.012972  | 0.708707  |
| C | -0.0004   | 11.877856  | 0.709431  | H | 0.00231   | 15.215234  | -2.055642 |
| H | 0.000416  | 15.080117  | -2.055329 | H | 0.001607  | 12.965412  | -2.655314 |
| H | -0.001593 | 12.830408  | -2.655262 | H | 0.00231   | 15.215234  | 2.055642  |
| H | 0.000416  | 15.080117  | 2.055329  | H | 0.001607  | 12.965412  | 2.655314  |
| H | -0.001593 | 12.830408  | 2.655262  | C | 0.00108   | 10.658044  | -1.156452 |
| C | -0.000324 | 10.523719  | -1.15666  | C | 0.000853  | 9.815249   | 0         |
| C | -0.000265 | 9.680814   | 0         | C | 0.00108   | 10.658044  | 1.156452  |
| C | -0.000324 | 10.523719  | 1.15666   | C | 0.000528  | 8.64619    | -2.461569 |
| C | -0.000271 | 8.512255   | -2.462165 | C | 0.000909  | 10.033141  | -2.408848 |
| C | -0.000333 | 9.89864    | -2.4095   | C | 0.000528  | 8.64619    | 2.461569  |
| C | -0.000271 | 8.512255   | 2.462165  | C | 0.000909  | 10.033141  | 2.408848  |
| C | -0.000333 | 9.89864    | 2.4095    | H | 0.000394  | 8.163723   | -3.434872 |
| H | -0.000263 | 8.029606   | -3.435349 | H | 0.001066  | 10.604124  | -3.333391 |
| H | -0.000362 | 10.469732  | -3.333937 | H | 0.000394  | 8.163723   | 3.434872  |
| H | -0.000263 | 8.029606   | 3.435349  | H | 0.001066  | 10.604124  | 3.333391  |
| H | -0.000362 | 10.469732  | 3.333937  | C | 0.00182   | -7.01756   | 5.39434   |
| C | -0.000135 | -7.13256   | 5.364254  | C | 0.00006   | -4.168099  | 5.388788  |
| C | -0.000055 | -4.283548  | 5.357074  | C | 0.002265  | -6.293693  | 6.585834  |
| C | -0.000497 | -6.407224  | 6.558089  | C | 0.001393  | -4.8863    | 6.583658  |
| C | -0.000457 | -5.001999  | 6.555041  | C | 0.004395  | -10.988688 | 1.425405  |
| C | 0.000109  | -11.089076 | 1.426797  | C | 0.004395  | -10.988688 | -1.425405 |
| C | 0.000109  | -11.089076 | -1.426797 | C | 0.006446  | -12.180306 | 0.704499  |
| C | -0.000047 | -12.276894 | 0.70612   | C | 0.006446  | -12.180306 | -0.704499 |
| C | -0.000047 | -12.276894 | -0.70612  | C | 0.00182   | -7.01756   | -5.39434  |
| C | -0.000135 | -7.13256   | -5.364254 | C | 0.00006   | -4.168099  | -5.388788 |
| C | -0.000055 | -4.283548  | -5.357074 | C | 0.002265  | -6.293693  | -6.585834 |
| C | -0.000497 | -6.407224  | -6.558089 | C | 0.001393  | -4.8863    | -6.583658 |
| C | -0.000457 | -5.001999  | -6.555041 | H | 0.00331   | -6.822239  | 7.534622  |
| H | -0.000742 | -6.935793  | 7.506943  | H | 0.001774  | -4.354207  | 7.530394  |
| H | -0.000672 | -4.46879   | 7.501245  | H | -0.000612 | -3.083125  | 5.378139  |
| H | -0.000016 | -3.198514  | 5.345819  | H | 0.002504  | -8.102521  | 5.38793   |
| H | -0.000165 | -8.217595  | 5.358246  | H | 0.004456  | -10.980518 | 2.510423  |
| H | 0.000114  | -11.079532 | 2.511535  | H | 0.004456  | -10.980518 | -2.510423 |
| H | 0.000114  | -11.079532 | -2.511535 | H | 0.008112  | -13.128442 | 1.234257  |
| H | -0.00013  | -13.225481 | 1.23473   | H | 0.008112  | -13.128442 | -1.234257 |
| H | -0.00013  | -13.225481 | -1.23473  | H | 0.002504  | -8.102521  | -5.38793  |
| H | -0.000165 | -8.217595  | -5.358246 | H | -0.000612 | -3.083125  | -5.378139 |
| H | -0.000016 | -3.198514  | -5.345819 | H | 0.00331   | -6.822239  | -7.534622 |

|   |           |           |           |    |           |           |           |
|---|-----------|-----------|-----------|----|-----------|-----------|-----------|
| H | -0.000742 | -6.935793 | -7.506943 | H  | 0.001774  | -4.354207 | -7.530394 |
| H | -0.000672 | -4.46879  | -7.501245 | N  | -0.004434 | -3.574253 | 0         |
| N | 0.000158  | -3.672855 | 0         | N  | 0.002434  | 15.075091 | 0         |
| H | 0.000199  | -4.688542 | 0         | H  | 0.0025    | 16.081188 | 0         |
| N | 0.002166  | 14.939543 | 0         | Mg | -0.005945 | -5.593761 | 0         |
| H | 0.002286  | 15.945719 | 0         |    |           |           |           |

**Zn-PcN-3A-N**

**Ni-PcN-3A-N**

|   |           |           |           |   |           |           |           |
|---|-----------|-----------|-----------|---|-----------|-----------|-----------|
| C | -0.001856 | -6.085371 | 4.180607  | C | -0.00043  | -6.077791 | 4.126442  |
| C | -0.00069  | -4.675518 | 4.178947  | C | -0.000095 | -4.677726 | 4.123381  |
| C | 0.000286  | -6.505095 | 2.782042  | C | -0.000639 | -6.488533 | 2.733814  |
| C | -0.004476 | -9.567045 | -0.706286 | C | -0.000144 | -9.498892 | -0.700868 |
| C | -0.004476 | -9.567045 | 0.706286  | C | -0.000144 | -9.498892 | 0.700868  |
| C | -0.000433 | -8.170704 | 1.120147  | C | -0.000291 | -8.108578 | 1.106675  |
| C | -0.00069  | -4.675518 | -4.178947 | C | -0.000095 | -4.677726 | -4.123381 |
| C | -0.001856 | -6.085371 | -4.180607 | C | -0.00043  | -6.077791 | -4.126442 |
| C | 0.002121  | -4.261353 | -2.77791  | C | -0.000133 | -4.274111 | -2.727538 |
| C | 0.000286  | -6.505095 | -2.782042 | C | -0.000639 | -6.488533 | -2.733814 |
| C | 0.003188  | -1.178018 | -0.723886 | C | 0.000825  | -1.236634 | -0.717904 |
| C | 0.003188  | -1.178018 | 0.723886  | C | 0.000825  | -1.236634 | 0.717904  |
| C | 0.004065  | -2.590472 | -1.120433 | C | 0.000467  | -2.644131 | -1.106352 |
| C | 0.004065  | -2.590472 | 1.120433  | C | 0.000467  | -2.644131 | 1.106352  |
| C | 0.002121  | -4.261353 | 2.77791   | C | -0.000133 | -4.274111 | 2.727538  |
| C | -0.000433 | -8.170704 | -1.120147 | C | -0.000291 | -8.108578 | -1.106675 |
| N | 0.002053  | -7.377696 | 0         | N | -0.000163 | -7.28178  | 0         |
| N | 0.00231   | -5.377175 | 1.985301  | N | -0.000583 | -5.376704 | 1.905041  |
| N | 0.00231   | -5.377175 | -1.985301 | N | -0.000583 | -5.376704 | -1.905041 |
| N | -0.000867 | -7.771089 | 2.392976  | N | -0.000525 | -7.752884 | 2.37925   |
| N | 0.003089  | -2.987491 | 2.388546  | N | 0.000343  | -3.002718 | 2.373394  |
| N | 0.003089  | -2.987491 | -2.388546 | N | 0.000343  | -3.002718 | -2.373394 |
| N | -0.000867 | -7.771089 | -2.392976 | N | -0.000525 | -7.752884 | -2.37925  |
| C | 0.002378  | -0.12968  | -1.592737 | C | 0.00097   | -0.192384 | -1.593154 |
| C | 0.001709  | 1.281054  | -1.316827 | C | 0.000983  | 1.217337  | -1.317353 |
| C | 0.001462  | 1.900733  | 0         | C | 0.000942  | 1.837306  | 0         |
| C | 0.001709  | 1.281054  | 1.316827  | C | 0.000983  | 1.217337  | 1.317353  |
| C | 0.002378  | -0.12968  | 1.592737  | C | 0.00097   | -0.192384 | 1.593154  |
| H | 0.002328  | -0.405287 | 2.644789  | H | 0.00095   | -0.470213 | 2.644141  |
| H | 0.002328  | -0.405287 | -2.644789 | H | 0.00095   | -0.470213 | -2.644141 |
| C | -0.000978 | 8.631602  | 0         | C | 0.000028  | 8.567593  | 0         |
| C | -0.000795 | 7.996762  | -1.317846 | C | 0.000159  | 7.932542  | -1.317896 |
| C | -0.000363 | 6.607128  | -1.583754 | C | 0.000419  | 6.543484  | -1.583805 |
| C | -0.000795 | 7.996762  | 1.317846  | C | 0.000159  | 7.932542  | 1.317896  |

|   |           |            |           |   |           |            |           |
|---|-----------|------------|-----------|---|-----------|------------|-----------|
| C | 0.00001   | 5.523788   | -0.724465 | C | 0.000573  | 5.459524   | -0.724431 |
| C | -0.000363 | 6.607128   | 1.583754  | C | 0.000419  | 6.543484   | 1.583805  |
| C | 0.00001   | 5.523788   | 0.724465  | C | 0.000573  | 5.459524   | 0.724431  |
| H | -0.000292 | 6.357447   | -2.643109 | H | 0.00048   | 6.293748   | -2.643146 |
| H | -0.000292 | 6.357447   | 2.643109  | H | 0.00048   | 6.293748   | 2.643146  |
| C | 0.000527  | 4.130574   | -1.160636 | C | 0.000759  | 4.067015   | -1.160726 |
| C | 0.000865  | 3.307047   | 0         | C | 0.000837  | 3.243162   | 0         |
| C | 0.000527  | 4.130574   | 1.160636  | C | 0.000759  | 4.067015   | 1.160726  |
| C | 0.001299  | 2.11938    | -2.452831 | C | 0.000968  | 2.056074   | -2.453569 |
| C | 0.00073   | 3.516797   | -2.403176 | C | 0.000847  | 3.453159   | -2.403446 |
| C | 0.00073   | 3.516797   | 2.403176  | C | 0.000847  | 3.453159   | 2.403446  |
| H | 0.001466  | 1.636625   | -3.42552  | H | 0.001007  | 1.573385   | -3.426269 |
| H | 0.000466  | 4.086619   | -3.327724 | H | 0.000803  | 4.023192   | -3.32788  |
| H | 0.000466  | 4.086619   | 3.327724  | H | 0.000803  | 4.023192   | 3.32788   |
| C | 0.001299  | 2.11938    | 2.452831  | C | 0.000968  | 2.056074   | 2.453569  |
| H | 0.001466  | 1.636625   | 3.42552   | H | 0.001007  | 1.573385   | 3.426269  |
| C | -0.002369 | 14.680341  | -1.258357 | C | -0.000676 | 14.61585   | -1.25831  |
| C | -0.002292 | 13.372524  | -1.589408 | C | -0.001157 | 13.307904  | -1.589392 |
| C | -0.002369 | 14.680341  | 1.258357  | C | -0.000676 | 14.61585   | 1.25831   |
| C | -0.001967 | 12.214975  | -0.708734 | C | -0.000794 | 12.150391  | -0.709156 |
| C | -0.002292 | 13.372524  | 1.589408  | C | -0.001157 | 13.307904  | 1.589392  |
| C | -0.001967 | 12.214975  | 0.708734  | C | -0.000794 | 12.150391  | 0.709156  |
| H | -0.002583 | 15.417234  | -2.055637 | H | -0.000953 | 15.352782  | -2.055545 |
| H | -0.002464 | 13.167432  | -2.655317 | H | -0.001833 | 13.102958  | -2.655341 |
| H | -0.002583 | 15.417234  | 2.055637  | H | -0.000953 | 15.352782  | 2.055545  |
| H | -0.002464 | 13.167432  | 2.655317  | H | -0.001833 | 13.102958  | 2.655341  |
| C | -0.001606 | 10.860081  | -1.15645  | C | -0.000474 | 10.796057  | -1.156585 |
| C | -0.001372 | 10.017277  | 0         | C | -0.00027  | 9.953152   | 0         |
| C | -0.001606 | 10.860081  | 1.15645   | C | -0.000474 | 10.796057  | 1.156585  |
| C | -0.001051 | 8.848238   | -2.461594 | C | -0.000026 | 8.784353   | -2.46201  |
| C | -0.001442 | 10.235163  | -2.408871 | C | -0.000339 | 10.170845  | -2.409299 |
| C | -0.001051 | 8.848238   | 2.461594  | C | -0.000026 | 8.784353   | 2.46201   |
| C | -0.001442 | 10.235163  | 2.408871  | C | -0.000339 | 10.170845  | 2.409299  |
| H | -0.000915 | 8.36576    | -3.434892 | H | 0.000076  | 8.301711   | -3.435227 |
| H | -0.001602 | 10.806161  | -3.333405 | H | -0.00046  | 10.741914  | -3.333798 |
| H | -0.000915 | 8.36576    | 3.434892  | H | 0.000076  | 8.301711   | 3.435227  |
| H | -0.001602 | 10.806161  | 3.333405  | H | -0.00046  | 10.741914  | 3.333798  |
| C | -0.004755 | -6.802885  | 5.377225  | C | -0.00038  | -6.80094   | 5.320822  |
| C | -0.002398 | -3.95307   | 5.372475  | C | 0.000282  | -3.947915  | 5.313592  |
| C | -0.006289 | -6.079338  | 6.568644  | C | -0.000069 | -6.075718  | 6.509864  |
| C | -0.005122 | -4.67163   | 6.566863  | C | 0.00027   | -4.66624   | 6.506806  |
| C | -0.008287 | -10.764316 | 1.425563  | C | -0.000063 | -10.693193 | 1.427142  |

|    |           |            |           |    |           |            |           |
|----|-----------|------------|-----------|----|-----------|------------|-----------|
| C  | -0.008287 | -10.764316 | -1.425563 | C  | -0.000063 | -10.693193 | -1.427142 |
| C  | -0.011831 | -11.955721 | 0.704601  | C  | 0.000048  | -11.882834 | 0.705513  |
| C  | -0.011831 | -11.955721 | -0.704601 | C  | 0.000048  | -11.882834 | -0.705513 |
| C  | -0.004755 | -6.802885  | -5.377225 | C  | -0.00038  | -6.80094   | -5.320822 |
| C  | -0.002398 | -3.95307   | -5.372475 | C  | 0.000282  | -3.947915  | -5.313592 |
| C  | -0.006289 | -6.079338  | -6.568644 | C  | -0.000069 | -6.075718  | -6.509864 |
| C  | -0.005122 | -4.67163   | -6.566863 | C  | 0.00027   | -4.66624   | -6.506806 |
| H  | -0.008454 | -6.608011  | 7.517346  | H  | -0.00008  | -6.60258   | 7.459532  |
| H  | -0.006403 | -4.139936  | 7.513808  | H  | 0.000535  | -4.134717  | 7.453778  |
| H  | -0.001548 | -2.868147  | 5.36166   | H  | 0.000575  | -2.863266  | 5.300335  |
| H  | -0.005713 | -7.887792  | 5.369972  | H  | -0.000632 | -7.885613  | 5.312609  |
| H  | -0.008396 | -10.755909 | 2.510544  | H  | -0.000058 | -10.682531 | 2.51184   |
| H  | -0.008396 | -10.755909 | -2.510544 | H  | -0.000058 | -10.682531 | -2.51184  |
| H  | -0.014706 | -12.903887 | 1.234271  | H  | 0.000153  | -12.831501 | 1.23419   |
| H  | -0.014706 | -12.903887 | -1.234271 | H  | 0.000153  | -12.831501 | -1.23419  |
| H  | -0.005713 | -7.887792  | -5.369972 | H  | -0.000632 | -7.885613  | -5.312609 |
| H  | -0.001548 | -2.868147  | -5.36166  | H  | 0.000575  | -2.863266  | -5.300335 |
| H  | -0.008454 | -6.608011  | -7.517346 | H  | -0.00008  | -6.60258   | -7.459532 |
| H  | -0.006403 | -4.139936  | -7.513808 | H  | 0.000535  | -4.134717  | -7.453778 |
| N  | 0.004799  | -3.376885  | 0         | N  | 0.000377  | -3.464577  | 0         |
| N  | -0.002112 | 15.277084  | 0         | N  | 0.000434  | 15.21241   | 0         |
| H  | -0.002576 | 16.283182  | 0         | H  | -0.000223 | 16.218527  | 0         |
| Zn | 0.016809  | -5.389191  | 0         | Ni | -0.000939 | -5.376479  | 0         |

**Pc-3A-N**

|   |           |           |           |
|---|-----------|-----------|-----------|
| C | 0.04259   | -6.334035 | 4.228978  |
| C | 0.299529  | -4.951634 | 4.242688  |
| C | -0.051974 | -6.698417 | 2.806518  |
| C | -0.630591 | -9.689953 | -0.703883 |
| C | -0.630591 | -9.689953 | 0.703883  |
| C | -0.395674 | -8.320618 | 1.15121   |
| C | 0.299529  | -4.951634 | -4.242688 |
| C | 0.04259   | -6.334035 | -4.228978 |
| C | 0.359262  | -4.539688 | -2.828361 |
| C | -0.051974 | -6.698417 | -2.806518 |
| C | 0.528599  | -1.541551 | -0.729364 |
| C | 0.528599  | -1.541551 | 0.729364  |
| C | 0.616965  | -2.935085 | -1.154961 |
| C | 0.616965  | -2.935085 | 1.154961  |
| C | 0.359262  | -4.539688 | 2.828361  |
| C | -0.395674 | -8.320618 | -1.15121  |
| N | -0.276677 | -7.556497 | 0         |

**Mg-Pc-3A-N**

|   |           |           |           |
|---|-----------|-----------|-----------|
| C | 0.000197  | -6.283165 | 4.217368  |
| C | 0.009976  | -4.870383 | 4.225643  |
| C | 0.002081  | -6.688705 | 2.80885   |
| C | -0.025081 | -9.770975 | -0.705945 |
| C | -0.025081 | -9.770975 | 0.705945  |
| C | -0.008922 | -8.364728 | 1.129596  |
| C | 0.009976  | -4.870383 | -4.225643 |
| C | 0.000197  | -6.283165 | -4.217368 |
| C | 0.018035  | -4.431573 | -2.822666 |
| C | 0.002081  | -6.688705 | -2.80885  |
| C | 0.025172  | -1.352835 | -0.733712 |
| C | 0.025172  | -1.352835 | 0.733712  |
| C | 0.031352  | -2.76136  | -1.145918 |
| C | 0.031352  | -2.76136  | 1.145918  |
| C | 0.018035  | -4.431573 | 2.822666  |
| C | -0.008922 | -8.364728 | -1.129596 |
| N | 0.001903  | -7.583496 | 0         |

|   |           |           |           |   |           |           |           |
|---|-----------|-----------|-----------|---|-----------|-----------|-----------|
| N | 0.143178  | -5.635157 | 2.014178  | N | 0.013448  | -5.576372 | 2.032023  |
| N | 0.143178  | -5.635157 | -2.014178 | N | 0.013448  | -5.576372 | -2.032023 |
| H | -0.141707 | -6.548893 | 0         | N | -0.007733 | -7.971203 | 2.400333  |
| N | -0.308482 | -7.963398 | 2.410084  | N | 0.025003  | -3.159556 | 2.448652  |
| N | 0.548863  | -3.287817 | 2.458349  | N | 0.025003  | -3.159556 | -2.448652 |
| N | 0.548863  | -3.287817 | -2.458349 | N | -0.007733 | -7.971203 | -2.400333 |
| N | -0.308482 | -7.963398 | -2.410084 | C | 0.019339  | -0.280492 | -1.585339 |
| C | 0.440289  | -0.476346 | -1.585273 | C | 0.01465   | 1.118656  | -1.306985 |
| C | 0.359141  | 0.919565  | -1.307405 | C | 0.012844  | 1.740485  | 0         |
| C | 0.322842  | 1.539431  | 0         | C | 0.01465   | 1.118656  | 1.306985  |
| C | 0.359141  | 0.919565  | 1.307405  | C | 0.019339  | -0.280492 | 1.585339  |
| C | 0.440289  | -0.476346 | 1.585273  | H | 0.018978  | -0.550108 | 2.639674  |
| H | 0.438785  | -0.750832 | 2.637977  | H | 0.018978  | -0.550108 | -2.639674 |
| H | 0.438785  | -0.750832 | -2.637977 | C | -0.004901 | 8.453815  | 0         |
| C | -0.084106 | 8.239724  | 0         | C | -0.003449 | 7.831899  | -1.304984 |
| C | -0.045446 | 7.6193    | -1.305159 | C | -0.000101 | 6.438169  | -1.579649 |
| C | 0.04002   | 6.228119  | -1.57976  | C | -0.003449 | 7.831899  | 1.304984  |
| C | -0.045446 | 7.6193    | 1.305159  | C | 0.002612  | 5.348214  | -0.739717 |
| C | 0.105684  | 5.140175  | -0.739972 | C | -0.000101 | 6.438169  | 1.579649  |
| C | 0.04002   | 6.228119  | 1.57976   | C | 0.002612  | 5.348214  | 0.739717  |
| C | 0.105684  | 5.140175  | 0.739972  | H | 0.000517  | 6.197783  | -2.641188 |
| H | 0.054947  | 5.988265  | -2.641337 | H | 0.000517  | 6.197783  | 2.641188  |
| H | 0.054947  | 5.988265  | 2.641337  | C | 0.00628   | 3.972713  | -1.162726 |
| C | 0.188399  | 3.767556  | -1.163156 | C | 0.008605  | 3.157285  | 0         |
| C | 0.237522  | 2.953866  | 0         | C | 0.00628   | 3.972713  | 1.162726  |
| C | 0.188399  | 3.767556  | 1.163156  | C | 0.011802  | 1.966083  | -2.461052 |
| C | 0.307147  | 1.765015  | -2.462268 | C | 0.007832  | 3.346075  | -2.417612 |
| C | 0.224956  | 3.142091  | -2.418655 | C | 0.007832  | 3.346075  | 2.417612  |
| C | 0.224956  | 3.142091  | 2.418655  | H | 0.013093  | 1.473346  | -3.428295 |
| H | 0.335325  | 1.272669  | -3.429295 | H | 0.006023  | 3.916009  | -3.342325 |
| H | 0.189752  | 3.711285  | -3.343095 | H | 0.006023  | 3.916009  | 3.342325  |
| H | 0.189752  | 3.711285  | 3.343095  | C | 0.011802  | 1.966083  | 2.461052  |
| C | 0.307147  | 1.765015  | 2.462268  | H | 0.013093  | 1.473346  | 3.428295  |
| H | 0.335325  | 1.272669  | 3.429295  | C | -0.018177 | 14.516413 | -1.26525  |
| C | -0.460609 | 14.290707 | -1.265363 | C | -0.01524  | 13.153266 | -1.58898  |
| C | -0.37527  | 12.930091 | -1.589023 | C | -0.018177 | 14.516413 | 1.26525   |
| C | -0.460609 | 14.290707 | 1.265363  | C | -0.012883 | 12.049853 | -0.746294 |
| C | -0.30686  | 11.828905 | -0.746445 | C | -0.01524  | 13.153266 | 1.58898   |
| C | -0.37527  | 12.930091 | 1.589023  | C | -0.012883 | 12.049853 | 0.746294  |
| C | -0.30686  | 11.828905 | 0.746445  | H | -0.019632 | 15.200706 | -2.109127 |
| H | -0.503224 | 14.973703 | -2.109205 | H | -0.014733 | 12.929154 | -2.654345 |
| H | -0.361042 | 12.706379 | -2.654392 | H | -0.019632 | 15.200706 | 2.109127  |

|   |           |            |           |    |           |            |           |
|---|-----------|------------|-----------|----|-----------|------------|-----------|
| H | -0.503224 | 14.973703  | 2.109205  | H  | -0.014733 | 12.929154  | 2.654345  |
| H | -0.361042 | 12.706379  | 2.654392  | C  | -0.009898 | 10.686323  | -1.164761 |
| C | -0.222175 | 10.468088  | -1.164881 | C  | -0.008107 | 9.870918   | 0         |
| C | -0.171826 | 9.654221   | 0         | C  | -0.009898 | 10.686323  | 1.164761  |
| C | -0.222175 | 10.468088  | 1.164881  | C  | -0.005378 | 8.680947   | -2.466718 |
| C | -0.097238 | 8.466746   | -2.466929 | C  | -0.00848  | 10.054137  | -2.426729 |
| C | -0.182463 | 9.837247   | -2.427023 | C  | -0.005378 | 8.680947   | 2.466718  |
| C | -0.097238 | 8.466746   | 2.466929  | C  | -0.00848  | 10.054137  | 2.426729  |
| C | -0.182463 | 9.837247   | 2.427023  | H  | -0.004227 | 8.186366   | -3.433411 |
| H | -0.065975 | 7.973023   | -3.433586 | H  | -0.009752 | 10.624201  | -3.350922 |
| H | -0.217348 | 10.406371  | -3.351139 | H  | -0.004227 | 8.186366   | 3.433411  |
| H | -0.065975 | 7.973023   | 3.433586  | H  | -0.009752 | 10.624201  | 3.350922  |
| H | -0.217348 | 10.406371  | 3.351139  | C  | -0.009465 | -7.011827  | 5.406071  |
| C | -0.079595 | -7.059437  | 5.410398  | C  | 0.01028   | -4.16559   | 5.428196  |
| C | 0.445112  | -4.26168   | 5.442184  | C  | -0.008851 | -6.302437  | 6.607223  |
| C | 0.066232  | -6.367379  | 6.616155  | C  | 0.000899  | -4.896333  | 6.617043  |
| C | 0.324615  | -4.987409  | 6.631167  | C  | -0.039235 | -10.964854 | 1.423739  |
| C | -0.825156 | -10.868634 | 1.424437  | C  | -0.039235 | -10.964854 | -1.423739 |
| C | -0.825156 | -10.868634 | -1.424437 | C  | -0.052922 | -12.160331 | 0.702685  |
| C | -1.022915 | -12.044791 | 0.703929  | C  | -0.052922 | -12.160331 | -0.702685 |
| C | -1.022915 | -12.044791 | -0.703929 | C  | -0.009465 | -7.011827  | -5.406071 |
| C | -0.079595 | -7.059437  | -5.410398 | C  | 0.01028   | -4.16559   | -5.428196 |
| C | 0.445112  | -4.26168   | -5.442184 | C  | -0.008851 | -6.302437  | -6.607223 |
| C | 0.066232  | -6.367379  | -6.616155 | C  | 0.000899  | -4.896333  | -6.617043 |
| C | 0.324615  | -4.987409  | -6.631167 | H  | -0.016035 | -6.84103   | 7.550481  |
| H | -0.020812 | -6.902723  | 7.557371  | H  | 0.001044  | -4.372557  | 7.568872  |
| H | 0.432217  | -4.477556  | 7.58449   | H  | 0.017682  | -3.080426  | 5.428414  |
| H | 0.644803  | -3.194883  | 5.446787  | H  | -0.017065 | -8.096826  | 5.386342  |
| H | -0.279999 | -8.125828  | 5.388608  | H  | -0.039362 | -10.954747 | 2.508776  |
| H | -0.820613 | -10.855592 | 2.509081  | H  | -0.039362 | -10.954747 | -2.508776 |
| H | -0.820613 | -10.855592 | -2.509081 | H  | -0.063881 | -13.107621 | 1.234011  |
| H | -1.179333 | -12.979403 | 1.234458  | H  | -0.063881 | -13.107621 | -1.234011 |
| H | -1.179333 | -12.979403 | -1.234458 | H  | -0.017065 | -8.096826  | -5.386342 |
| H | -0.279999 | -8.125828  | -5.388608 | H  | 0.017682  | -3.080426  | -5.428414 |
| H | 0.644803  | -3.194883  | -5.446787 | H  | -0.016035 | -6.84103   | -7.550481 |
| H | -0.020812 | -6.902723  | -7.557371 | H  | 0.001044  | -4.372557  | -7.568872 |
| H | 0.432217  | -4.477556  | -7.58449  | H  | -0.0218   | 16.197894  | 0         |
| H | 0.889846  | -4.785295  | 0         | C  | 0.040517  | -3.573583  | 0         |
| H | -0.566173 | 15.968723  | 0         | C  | -0.019467 | 15.109724  | 0         |
| C | 0.736834  | -3.727059  | 0         | Mg | 0.028925  | -5.591658  | 0         |
| C | -0.498081 | 14.882647  | 0         |    |           |            |           |

| Zn-Pc-3A-N |           |           | Ni-Pc-3A-N |   |           |           |           |
|------------|-----------|-----------|------------|---|-----------|-----------|-----------|
| C          | -6.037076 | 4.234289  | 0.021473   | C | -0.000558 | -6.046302 | 4.122421  |
| C          | -4.632309 | 4.244355  | -0.113919  | C | -0.000623 | -4.647605 | 4.148112  |
| C          | -6.432723 | 2.822803  | 0.052875   | C | -0.000125 | -6.430824 | 2.718171  |
| C          | -9.45012  | -0.7031   | 0.382967   | C | 0.000764  | -9.479907 | -0.700258 |
| C          | -9.450089 | 0.703069  | 0.382907   | C | 0.000764  | -9.479907 | 0.700258  |
| C          | -8.060628 | 1.126435  | 0.185217   | C | 0.000276  | -8.077327 | 1.105451  |
| C          | -4.632285 | -4.244328 | -0.11404   | C | -0.000623 | -4.647605 | -4.148112 |
| C          | -6.037051 | -4.234309 | 0.021409   | C | -0.000558 | -6.046302 | -4.122421 |
| C          | -4.205085 | -2.838952 | -0.171383  | C | -0.000217 | -4.210535 | -2.75926  |
| C          | -6.432717 | -2.822855 | 0.052982   | C | -0.000125 | -6.430824 | -2.718171 |
| C          | -1.187379 | -0.729684 | -0.321564  | C | 0.00015   | -1.215782 | -0.723735 |
| C          | -1.18738  | 0.729723  | -0.321601  | C | 0.00015   | -1.215782 | 0.723735  |
| C          | -2.590977 | -1.143848 | -0.381814  | C | 0.000129  | -2.614274 | -1.128149 |
| C          | -2.590994 | 1.143889  | -0.381814  | C | 0.000129  | -2.614274 | 1.128149  |
| C          | -4.205079 | 2.838998  | -0.171395  | C | -0.000217 | -4.210535 | 2.75926   |
| C          | -8.060664 | -1.126534 | 0.185311   | C | 0.000276  | -8.077327 | -1.105451 |
| N          | -7.273479 | -0.000062 | 0.053456   | N | -0.000127 | -7.259252 | 0         |
| N          | -5.33269  | 2.045246  | -0.050439  | N | 0.00005   | -5.320247 | 1.909699  |
| N          | -5.332741 | -2.045241 | -0.050316  | N | 0.00005   | -5.320247 | -1.909699 |
| N          | -7.700853 | 2.402637  | 0.173353   | N | 0.000071  | -7.710893 | 2.369113  |
| N          | -2.948832 | 2.450385  | -0.300087  | N | -0.000123 | -2.943263 | 2.428126  |
| N          | -2.948858 | -2.45033  | -0.300095  | N | -0.000123 | -2.943263 | -2.428126 |
| N          | -7.70089  | -2.402724 | 0.173543   | N | 0.000071  | -7.710893 | -2.369113 |
| C          | -0.119395 | -1.584701 | -0.261059  | C | 0.000086  | -0.150532 | -1.585705 |
| C          | 1.278561  | -1.307153 | -0.212713  | C | 0.000124  | 1.246967  | -1.307599 |
| C          | 1.899778  | 0.000012  | -0.191847  | C | 0.000148  | 1.868822  | 0         |
| C          | 1.278568  | 1.307178  | -0.212879  | C | 0.000124  | 1.246967  | 1.307599  |
| C          | -0.119387 | 1.584734  | -0.261213  | C | 0.000086  | -0.150532 | 1.585705  |
| H          | -0.392483 | 2.637951  | -0.254114  | H | 0.000019  | -0.425328 | 2.63807   |
| H          | -0.392493 | -2.637918 | -0.253899  | H | 0.000019  | -0.425328 | -2.63807  |
| C          | 8.608197  | 0.000002  | 0.054821   | C | 0.000147  | 8.581488  | 0         |
| C          | 7.986828  | -1.305059 | 0.031401   | C | 0.000162  | 7.95955   | -1.305027 |
| C          | 6.594042  | -1.579689 | -0.020439  | C | 0.000187  | 6.566138  | -1.579718 |
| C          | 7.986842  | 1.305065  | 0.031166   | C | 0.000162  | 7.95955   | 1.305027  |
| C          | 5.504798  | -0.739817 | -0.060278  | C | 0.000191  | 5.475769  | -0.73982  |
| C          | 6.594056  | 1.579699  | -0.020707  | C | 0.000187  | 6.566138  | 1.579718  |
| C          | 5.504804  | 0.739831  | -0.060393  | C | 0.000191  | 5.475769  | 0.73982   |
| H          | 6.353846  | -2.641244 | -0.029403  | H | 0.000198  | 6.325793  | -2.641274 |
| H          | 6.353871  | 2.641254  | -0.029845  | H | 0.000198  | 6.325793  | 2.641274  |
| C          | 4.13038   | -1.162929 | -0.110161  | C | 0.000187  | 4.10094   | -1.162872 |
| C          | 3.315631  | 0.000011  | -0.140095  | C | 0.000183  | 3.285322  | 0         |

|   |            |           |           |   |           |            |           |
|---|------------|-----------|-----------|---|-----------|------------|-----------|
| C | 4.130389   | 1.162948  | -0.110336 | C | 0.000187  | 4.10094    | 1.162872  |
| C | 2.12515    | -2.461581 | -0.180373 | C | 0.000127  | 2.094888   | -2.462326 |
| C | 3.504091   | -2.418055 | -0.131268 | C | 0.00016   | 3.474246   | -2.418326 |
| C | 3.504108   | 2.418075  | -0.131618 | C | 0.00016   | 3.474246   | 2.418326  |
| H | 1.632401   | -3.428679 | -0.19646  | H | 0.000109  | 1.602029   | -3.429481 |
| H | 4.073776   | -3.342648 | -0.109493 | H | 0.000168  | 4.044564   | -3.342789 |
| H | 4.073799   | 3.342668  | -0.109988 | H | 0.000168  | 4.044564   | 3.342789  |
| C | 2.125167   | 2.461604  | -0.18071  | C | 0.000127  | 2.094888   | 2.462326  |
| H | 1.632423   | 3.428703  | -0.196924 | H | 0.000109  | 1.602029   | 3.429481  |
| C | 14.666507  | -1.265305 | 0.283834  | C | -0.000015 | 14.644     | -1.265268 |
| C | 13.30429   | -1.589003 | 0.231986  | C | 0.000027  | 13.28089   | -1.589013 |
| C | 14.666522  | 1.265289  | 0.283588  | C | -0.000015 | 14.644     | 1.265268  |
| C | 12.201698  | -0.74636  | 0.19035   | C | 0.000062  | 12.177409  | -0.746354 |
| C | 13.304303  | 1.58899   | 0.23168   | C | 0.000027  | 13.28089   | 1.589013  |
| C | 12.201707  | 0.746351  | 0.190208  | C | 0.000062  | 12.177409  | 0.746354  |
| H | 15.35032   | -2.109168 | 0.309803  | H | -0.000037 | 15.328319  | -2.109128 |
| H | 13.080316  | -2.654369 | 0.223418  | H | 0.000034  | 13.056794  | -2.654385 |
| H | 15.350341  | 2.109152  | 0.309391  | H | -0.000037 | 15.328319  | 2.109128  |
| H | 13.080341  | 2.654356  | 0.22291   | H | 0.000034  | 13.056794  | 2.654385  |
| C | 10.839175  | -1.164817 | 0.138893  | C | 0.000101  | 10.814033  | -1.164782 |
| C | 10.024335  | 0         | 0.108189  | C | 0.00012   | 9.998585   | 0         |
| C | 10.839184  | 1.164813  | 0.138674  | C | 0.000101  | 10.814033  | 1.164782  |
| C | 8.835287   | -2.466809 | 0.062914  | C | 0.00015   | 8.808789   | -2.466937 |
| C | 10.207481  | -2.426852 | 0.114772  | C | 0.000119  | 10.181802  | -2.42691  |
| C | 8.83531    | 2.466812  | 0.06246   | C | 0.00015   | 8.808789   | 2.466937  |
| C | 10.207506  | 2.426849  | 0.11432   | C | 0.000119  | 10.181802  | 2.42691   |
| H | 8.341019   | -3.433489 | 0.043917  | H | 0.000167  | 8.314153   | -3.433607 |
| H | 10.777201  | -3.351014 | 0.136016  | H | 0.000109  | 10.751953  | -3.351051 |
| H | 8.341053   | 3.433493  | 0.043285  | H | 0.000167  | 8.314153   | 3.433607  |
| H | 10.777235  | 3.35101   | 0.135387  | H | 0.000109  | 10.751953  | 3.351051  |
| C | -6.763336  | 5.421062  | 0.102402  | C | -0.000874 | -6.797033  | 5.298907  |
| C | -3.929957  | 5.446172  | -0.173881 | C | -0.001016 | -3.947622  | 5.355253  |
| C | -6.056947  | 6.623194  | 0.043921  | C | -0.001248 | -6.101126  | 6.506179  |
| C | -4.657833  | 6.63463   | -0.092569 | C | -0.001321 | -4.692889  | 6.533094  |
| C | -10.62931  | 1.423927  | 0.560757  | C | 0.001147  | -10.670021 | 1.425383  |
| C | -10.629354 | -1.423913 | 0.56089   | C | 0.001147  | -10.670021 | -1.425383 |
| C | -11.811833 | 0.703087  | 0.733441  | C | 0.001556  | -11.864255 | 0.703375  |
| C | -11.811857 | -0.703022 | 0.73351   | C | 0.001556  | -11.864255 | -0.703375 |
| C | -6.763285  | -5.421113 | 0.102211  | C | -0.000874 | -6.797033  | -5.298907 |
| C | -3.929899  | -5.446118 | -0.174179 | C | -0.001016 | -3.947622  | -5.355253 |
| C | -6.056861  | -6.623209 | 0.043567  | C | -0.001248 | -6.101126  | -6.506179 |
| C | -4.657746  | -6.634597 | -0.092977 | C | -0.001321 | -4.692889  | -6.533094 |



|    |            |           |           |    |           |            |           |
|----|------------|-----------|-----------|----|-----------|------------|-----------|
| H  | -6.593264  | 7.56588   | 0.103654  | H  | -0.001488 | -6.649834  | 7.443551  |
| H  | -4.136725  | 7.586944  | -0.135108 | H  | -0.001621 | -4.181633  | 7.491613  |
| H  | -2.849943  | 5.448337  | -0.280093 | H  | -0.001057 | -2.862785  | 5.366228  |
| H  | -7.843369  | 5.400973  | 0.206391  | H  | -0.000802 | -7.881275  | 5.263155  |
| H  | -10.616798 | 2.508817  | 0.562726  | H  | 0.001141  | -10.658635 | 2.510221  |
| H  | -10.616868 | -2.508803 | 0.562963  | H  | 0.001141  | -10.658635 | -2.510221 |
| H  | -12.74921  | 1.234134  | 0.871676  | H  | 0.001877  | -12.812091 | 1.233773  |
| H  | -12.74925  | -1.234025 | 0.871803  | H  | 0.001877  | -12.812091 | -1.233773 |
| H  | -7.843315  | -5.401067 | 0.206233  | H  | -0.000802 | -7.881275  | -5.263155 |
| H  | -2.84989   | -5.448231 | -0.280443 | H  | -0.001057 | -2.862785  | -5.366228 |
| H  | -6.593149  | -7.565918 | 0.103208  | H  | -0.001488 | -6.649834  | -7.443551 |
| H  | -4.136619  | -7.586895 | -0.135643 | H  | -0.001621 | -4.181633  | -7.491613 |
| H  | 16.34671   | -0.00001  | 0.347906  | H  | -0.000062 | 16.325471  | 0         |
| C  | -3.410445  | 0.000013  | -0.495275 | C  | 0.000278  | -3.473943  | 0         |
| C  | 15.259313  | -0.000007 | 0.306517  | C  | -0.000032 | 15.237295  | 0         |
| Zn | -5.335897  | -0.000023 | -0.327995 | Ni | 0.000064  | -5.332543  | 0         |

| <b>P<sub>N</sub>-N-A</b> |   |           |           | <b>P<sub>N</sub>-N-2A</b> |   |           |           |
|--------------------------|---|-----------|-----------|---------------------------|---|-----------|-----------|
| C                        | 0 | 4.148312  | -1.775592 | C                         | 0 | 4.146561  | -4.804659 |
| C                        | 0 | 4.148217  | -0.423355 | C                         | 0 | 4.144021  | -3.452973 |
| C                        | 0 | 2.737921  | -2.183147 | C                         | 0 | 2.7384    | -5.217157 |
| C                        | 0 | -0.68253  | -5.25293  | C                         | 0 | -0.686997 | -8.27581  |
| C                        | 0 | 0.68253   | -5.25293  | C                         | 0 | 0.686997  | -8.27581  |
| C                        | 0 | 1.131634  | -3.875936 | C                         | 0 | 1.128881  | -6.909135 |
| C                        | 0 | -4.148217 | -0.423355 | C                         | 0 | -4.144021 | -3.452973 |
| C                        | 0 | -4.148312 | -1.775592 | C                         | 0 | -4.146561 | -4.804659 |
| C                        | 0 | -2.738172 | -0.015577 | C                         | 0 | -2.732052 | -3.049562 |
| C                        | 0 | -2.737921 | -2.183147 | C                         | 0 | -2.7384   | -5.217157 |
| C                        | 0 | -0.693972 | 3.051096  | C                         | 0 | -0.715028 | 0.062478  |
| C                        | 0 | 0.693972  | 3.051096  | C                         | 0 | 0.715028  | 0.062478  |
| C                        | 0 | -1.126832 | 1.674534  | C                         | 0 | -1.141201 | -1.33748  |
| C                        | 0 | 1.126832  | 1.674534  | C                         | 0 | 1.141201  | -1.33748  |
| C                        | 0 | 2.738172  | -0.015577 | C                         | 0 | 2.732052  | -3.049562 |
| C                        | 0 | -1.131634 | -3.875936 | C                         | 0 | -1.128881 | -6.909135 |
| N                        | 0 | 0         | -3.096388 | N                         | 0 | 0         | -6.128033 |
| N                        | 0 | 1.911496  | -1.103203 | N                         | 0 | 1.906653  | -4.119128 |
| N                        | 0 | -1.911496 | -1.103203 | N                         | 0 | -1.906653 | -4.119128 |
| H                        | 0 | 0         | -2.084628 | H                         | 0 | 0         | -5.116255 |
| H                        | 0 | 0         | -0.123756 | H                         | 0 | 0         | -3.118063 |
| N                        | 0 | 2.392227  | -3.478695 | N                         | 0 | 2.39708   | -6.498706 |
| N                        | 0 | 2.390171  | 1.273862  | N                         | 0 | 2.389306  | -1.745801 |
| N                        | 0 | -2.390171 | 1.273862  | N                         | 0 | -2.389306 | -1.745801 |

|   |   |           |           |   |   |           |           |
|---|---|-----------|-----------|---|---|-----------|-----------|
| N | 0 | -2.392227 | -3.478695 | N | 0 | -2.39708  | -6.498706 |
| C | 0 | -1.604541 | 4.188383  | C | 0 | -1.598233 | 1.121907  |
| C | 0 | -1.263532 | 5.490316  | C | 0 | -1.324827 | 2.510047  |
| C | 0 | 1.263532  | 5.490316  | C | 0 | 0         | 3.140712  |
| C | 0 | 1.604541  | 4.188383  | C | 0 | 1.324827  | 2.510047  |
| H | 0 | 2.661275  | 3.949499  | C | 0 | 1.598233  | 1.121907  |
| H | 0 | -2.661275 | 3.949499  | H | 0 | 2.647569  | 0.837534  |
| H | 0 | -4.979949 | -2.466168 | H | 0 | -2.647569 | 0.837534  |
| H | 0 | -4.980077 | 0.266976  | H | 0 | -4.979044 | -5.494221 |
| H | 0 | -1.358593 | -6.095553 | H | 0 | -4.97395  | -2.76034  |
| H | 0 | 1.358593  | -6.095553 | H | 0 | -1.360614 | -9.120248 |
| H | 0 | 4.979949  | -2.466168 | H | 0 | 1.360614  | -9.120248 |
| H | 0 | 4.980077  | 0.266976  | H | 0 | 4.979044  | -5.494221 |
| N | 0 | 0         | 0.886101  | H | 0 | 4.97395   | -2.76034  |
| H | 0 | 2.057053  | 6.231333  | N | 0 | 0         | -2.102775 |
| H | 0 | 0         | 7.091239  | C | 0 | -1.257758 | 9.18977   |
| H | 0 | -2.057053 | 6.231333  | C | 0 | -1.589931 | 7.882386  |
| N | 0 | 0         | 6.08514   | C | 0 | 1.257758  | 9.18977   |
|   |   |           |           | C | 0 | -0.70763  | 6.725231  |
|   |   |           |           | C | 0 | 1.589931  | 7.882386  |
|   |   |           |           | C | 0 | 0.70763   | 6.725231  |
|   |   |           |           | H | 0 | -2.655347 | 7.676543  |
|   |   |           |           | H | 0 | 2.655347  | 7.676543  |
|   |   |           |           | C | 0 | -1.156463 | 5.369226  |
|   |   |           |           | C | 0 | 0         | 4.524732  |
|   |   |           |           | C | 0 | 1.156463  | 5.369226  |
|   |   |           |           | C | 0 | -2.464897 | 3.361711  |
|   |   |           |           | C | 0 | -2.40929  | 4.750256  |
|   |   |           |           | C | 0 | 2.40929   | 4.750256  |
|   |   |           |           | H | 0 | -3.438061 | 2.879961  |
|   |   |           |           | H | 0 | -3.332262 | 5.323325  |
|   |   |           |           | H | 0 | 3.332262  | 5.323325  |
|   |   |           |           | C | 0 | 2.464897  | 3.361711  |
|   |   |           |           | H | 0 | 3.438061  | 2.879961  |
|   |   |           |           | H | 0 | 2.055088  | 9.926491  |
|   |   |           |           | H | 0 | 0         | 10.792493 |
|   |   |           |           | H | 0 | -2.055088 | 9.926491  |
|   |   |           |           | N | 0 | 0         | 9.786107  |

**P<sub>N</sub>-A-N**

**P<sub>N</sub>-2A-N**

|   |   |          |          |   |           |           |          |
|---|---|----------|----------|---|-----------|-----------|----------|
| C | 0 | 4.211288 | 1.744035 | C | -0.026401 | -4.727154 | 4.206833 |
| C | 0 | 4.225175 | 0.392123 | C | 0.197482  | -3.393189 | 4.220106 |

|   |   |           |           |   |           |           |           |
|---|---|-----------|-----------|---|-----------|-----------|-----------|
| C | 0 | 2.789481  | 2.133288  | C | -0.10642  | -5.108849 | 2.786835  |
| C | 0 | -0.678805 | 5.174891  | C | -0.620987 | -8.09515  | -0.680342 |
| C | 0 | 0.678805  | 5.174891  | C | -0.620987 | -8.09515  | 0.680342  |
| C | 0 | 1.137757  | 3.791213  | C | -0.420263 | -6.731138 | 1.135534  |
| C | 0 | -4.225175 | 0.392123  | C | 0.197482  | -3.393189 | -4.220106 |
| C | 0 | -4.211288 | 1.744035  | C | -0.026401 | -4.727154 | -4.206833 |
| C | 0 | -2.815129 | -0.038893 | C | 0.266566  | -2.972825 | -2.810397 |
| C | 0 | -2.789481 | 2.133288  | C | -0.10642  | -5.108849 | -2.786835 |
| C | 0 | -0.730444 | -3.068457 | C | 0.400628  | 0.035195  | -0.726824 |
| C | 0 | 0.730444  | -3.068457 | C | 0.400628  | 0.035195  | 0.726824  |
| C | 0 | -1.157456 | -1.68081  | C | 0.519236  | -1.356919 | -1.155433 |
| C | 0 | 1.157456  | -1.68081  | C | 0.519236  | -1.356919 | 1.155433  |
| C | 0 | 2.815129  | -0.038893 | C | 0.266566  | -2.972825 | 2.810397  |
| C | 0 | -1.137757 | 3.791213  | C | -0.420263 | -6.731138 | -1.135534 |
| N | 0 | 0         | 3.00835   | N | -0.315758 | -5.950716 | 0         |
| N | 0 | 1.98483   | 1.06415   | N | 0.077461  | -4.049465 | 1.979813  |
| N | 0 | -1.98483  | 1.06415   | N | 0.077461  | -4.049465 | -1.979813 |
| H | 0 | 0         | 1.996738  | H | -0.204649 | -4.941446 | 0         |
| H | 0 | 0         | 0.17159   | H | 0.850407  | -3.198114 | 0         |
| N | 0 | 2.402838  | 3.43129   | N | -0.341311 | -6.379739 | 2.404569  |
| N | 0 | 2.463623  | -1.313602 | N | 0.44181   | -1.706532 | 2.456058  |
| N | 0 | -2.463623 | -1.313602 | N | 0.44181   | -1.706532 | -2.456058 |
| N | 0 | -2.402838 | 3.43129   | N | -0.341311 | -6.379739 | -2.404569 |
| C | 0 | -1.593144 | -4.156014 | C | 0.285564  | 1.099566  | -1.585578 |
| C | 0 | -1.264609 | -5.516095 | C | 0.175464  | 2.488749  | -1.306783 |
| C | 0 | 0         | -6.113127 | C | 0.126269  | 3.107868  | 0         |
| C | 0 | 1.264609  | -5.516095 | C | 0.175464  | 2.488749  | 1.306783  |
| C | 0 | 1.593144  | -4.156014 | C | 0.285564  | 1.099566  | 1.585578  |
| H | 0 | 2.649153  | -3.895361 | H | 0.287267  | 0.821853  | 2.637438  |
| H | 0 | -2.649153 | -3.895361 | H | 0.287267  | 0.821853  | -2.637438 |
| H | 0 | -5.038571 | 2.440245  | H | -0.146272 | -5.413118 | -5.03417  |
| H | 0 | -5.068816 | -0.28438  | H | 0.315896  | -2.725558 | -5.062629 |
| H | 0 | -1.357529 | 6.015509  | H | -0.733341 | -8.928181 | -1.359102 |
| H | 0 | 1.357529  | 6.015509  | H | -0.733341 | -8.928181 | 1.359102  |
| H | 0 | 5.038571  | 2.440245  | H | -0.146272 | -5.413118 | 5.03417   |
| H | 0 | 5.068816  | -0.28438  | H | 0.315896  | -2.725558 | 5.062629  |
| C | 0 | 0         | -0.890356 | C | -0.420001 | 9.743328  | 0         |
| H | 0 | 2.107321  | -6.203097 | C | -0.370579 | 9.150176  | -1.264343 |
| H | 0 | 0         | -7.200801 | C | -0.258299 | 7.792989  | -1.58847  |
| H | 0 | -2.107321 | -6.203097 | C | -0.370579 | 9.150176  | 1.264343  |
| C | 0 | 4.211288  | 1.744035  | C | -0.167855 | 6.692894  | -0.744361 |
| C | 0 | 4.225175  | 0.392123  | C | -0.258299 | 7.792989  | 1.58847   |

|   |   |           |           |   |           |           |           |
|---|---|-----------|-----------|---|-----------|-----------|-----------|
| C | 0 | 2.789481  | 2.133288  | C | -0.167855 | 6.692894  | 0.744361  |
| C | 0 | -0.678805 | 5.174891  | H | -0.239746 | 7.569262  | -2.653523 |
| C | 0 | 0.678805  | 5.174891  | H | -0.239746 | 7.569262  | 2.653523  |
| C | 0 | 1.137757  | 3.791213  | C | -0.056387 | 5.332978  | -1.16329  |
| C | 0 | -4.225175 | 0.392123  | C | 0.010447  | 4.520264  | 0         |
| C | 0 | -4.211288 | 1.744035  | C | -0.056387 | 5.332978  | 1.16329   |
| C | 0 | -2.815129 | -0.038893 | C | 0.104811  | 3.335233  | -2.46721  |
| C | 0 | -2.789481 | 2.133288  | C | -0.006327 | 4.704783  | -2.424615 |
| C | 0 | -0.730444 | -3.068457 | C | -0.006327 | 4.704783  | 2.424615  |
| C | 0 | 0.730444  | -3.068457 | H | 0.143642  | 2.840897  | -3.432628 |
| C | 0 | -1.157456 | -1.68081  | H | -0.053903 | 5.2737    | -3.348486 |
| C | 0 | 1.157456  | -1.68081  | H | -0.053903 | 5.2737    | 3.348486  |
| C | 0 | 2.815129  | -0.038893 | C | 0.104811  | 3.335233  | 2.46721   |
| C | 0 | -1.137757 | 3.791213  | H | 0.143642  | 2.840897  | 3.432628  |
| N | 0 | 0         | 3.00835   | C | 0.665712  | -2.145142 | 0         |
| N | 0 | 1.98483   | 1.06415   | H | -0.426823 | 9.831805  | 2.108624  |
| N | 0 | -1.98483  | 1.06415   | H | -0.509698 | 10.827568 | 0         |
| H | 0 | 0         | 1.996738  | H | -0.426823 | 9.831805  | -2.108624 |
| H | 0 | 0         | 0.17159   |   |           |           |           |
| N | 0 | 2.402838  | 3.43129   |   |           |           |           |
| N | 0 | 2.463623  | -1.313602 |   |           |           |           |
| N | 0 | -2.463623 | -1.313602 |   |           |           |           |
| N | 0 | -2.402838 | 3.43129   |   |           |           |           |
| C | 0 | -1.593144 | -4.156014 |   |           |           |           |
| C | 0 | -1.264609 | -5.516095 |   |           |           |           |
| C | 0 | 0         | -6.113127 |   |           |           |           |
| C | 0 | 1.264609  | -5.516095 |   |           |           |           |
| C | 0 | 1.593144  | -4.156014 |   |           |           |           |
| H | 0 | 2.649153  | -3.895361 |   |           |           |           |
| H | 0 | -2.649153 | -3.895361 |   |           |           |           |
| H | 0 | -5.038571 | 2.440245  |   |           |           |           |
| H | 0 | -5.068816 | -0.28438  |   |           |           |           |
| H | 0 | -1.357529 | 6.015509  |   |           |           |           |
| H | 0 | 1.357529  | 6.015509  |   |           |           |           |
| H | 0 | 5.038571  | 2.440245  |   |           |           |           |
| H | 0 | 5.068816  | -0.28438  |   |           |           |           |
| C | 0 | 0         | -0.890356 |   |           |           |           |
| H | 0 | 2.107321  | -6.203097 |   |           |           |           |

**PcN-A-N**

C 0.000036 -0.903053 4.172779

**PcN-2A-N**

C 0 4.171057 -3.504867

|   |           |           |           |   |   |           |           |
|---|-----------|-----------|-----------|---|---|-----------|-----------|
| C | 0.00001   | 0.501056  | 4.175102  | C | 0 | 4.168749  | -2.100797 |
| C | 0.00007   | -1.294415 | 2.758018  | C | 0 | 2.759359  | -3.903274 |
| C | 0.000089  | -4.383687 | -0.705    | C | 0 | -0.707407 | -6.981392 |
| C | 0.000089  | -4.383687 | 0.705     | C | 0 | 0.707407  | -6.981392 |
| C | 0.000089  | -2.992743 | 1.148091  | C | 0 | 1.145089  | -5.598548 |
| C | 0.00001   | 0.501056  | -4.175102 | C | 0 | -4.168749 | -2.100797 |
| C | 0.000036  | -0.903053 | -4.172779 | C | 0 | -4.171057 | -3.504867 |
| C | 0.000029  | 0.902225  | -2.761706 | C | 0 | -2.754604 | -1.708114 |
| C | 0.00007   | -1.294415 | -2.758018 | C | 0 | -2.759359 | -3.903274 |
| C | -0.000097 | 3.94592   | -0.698053 | C | 0 | -0.714983 | 1.382818  |
| C | -0.000097 | 3.94592   | 0.698053  | C | 0 | 0.714983  | 1.382818  |
| C | -0.000035 | 2.578879  | -1.126696 | C | 0 | -1.140015 | -0.011025 |
| C | -0.000035 | 2.578879  | 1.126696  | C | 0 | 1.140015  | -0.011025 |
| C | 0.000029  | 0.902225  | 2.761706  | C | 0 | 2.754604  | -1.708114 |
| C | 0.000089  | -2.992743 | -1.148091 | C | 0 | -1.145089 | -5.598548 |
| N | 0.000107  | -2.227109 | 0         | N | 0 | 0         | -4.833183 |
| N | -0.000013 | -0.214056 | 1.948605  | N | 0 | 1.944307  | -2.803531 |
| N | -0.000013 | -0.214056 | -1.948605 | N | 0 | -1.944307 | -2.803531 |
| H | 0.000129  | -1.213914 | 0         | H | 0 | 0         | -3.819965 |
| N | 0.000089  | -2.593555 | 2.395883  | N | 0 | 2.399488  | -5.186883 |
| N | -0.000015 | 2.173223  | 2.396056  | N | 0 | 2.392391  | -0.420805 |
| N | -0.000015 | 2.173223  | -2.396056 | N | 0 | -2.392391 | -0.420805 |
| N | 0.000089  | -2.593555 | -2.395883 | N | 0 | -2.399488 | -5.186883 |
| C | -0.000151 | 5.085586  | -1.60353  | C | 0 | -1.59797  | 2.447834  |
| C | -0.00021  | 6.388129  | -1.263281 | C | 0 | -1.324934 | 3.831798  |
| C | -0.00021  | 6.388129  | 1.263281  | C | 0 | 0         | 4.464248  |
| C | -0.000151 | 5.085586  | 1.60353   | C | 0 | 1.324934  | 3.831798  |
| H | -0.000142 | 4.84976   | 2.661093  | C | 0 | 1.59797   | 2.447834  |
| H | -0.000142 | 4.84976   | -2.661093 | H | 0 | 2.647434  | 2.164399  |
| C | 0.000036  | -1.629977 | 5.360422  | H | 0 | -2.647434 | 2.164399  |
| C | -0.000019 | 1.219222  | 5.367676  | C | 0 | -1.257811 | 10.51046  |
| C | 0.000017  | -0.911633 | 6.558512  | C | 0 | -1.590167 | 9.20254   |
| C | -0.000011 | 0.493275  | 6.561502  | C | 0 | 1.257811  | 10.51046  |
| C | 0.000089  | -5.577946 | 1.42538   | C | 0 | -0.710093 | 8.045256  |
| C | 0.000089  | -5.577946 | -1.42538  | C | 0 | 1.590167  | 9.20254   |
| C | 0.000089  | -6.770188 | 0.703705  | C | 0 | 0.710093  | 8.045256  |
| C | 0.000089  | -6.770188 | -0.703705 | H | 0 | -2.65582  | 8.99743   |
| C | 0.000036  | -1.629977 | -5.360422 | H | 0 | 2.65582   | 8.99743   |
| C | -0.000019 | 1.219222  | -5.367676 | C | 0 | -1.157204 | 6.692944  |
| C | 0.000017  | -0.911633 | -6.558512 | C | 0 | 0         | 5.847528  |
| C | -0.000011 | 0.493275  | -6.561502 | C | 0 | 1.157204  | 6.692944  |
| H | 0.000024  | -1.444957 | 7.504638  | C | 0 | -2.467517 | 4.686101  |

|   |           |           |           |   |   |           |            |
|---|-----------|-----------|-----------|---|---|-----------|------------|
| H | -0.000025 | 1.021834  | 7.51039   | C | 0 | -2.412041 | 6.071594   |
| H | -0.000038 | 2.30427   | 5.362584  | C | 0 | 2.412041  | 6.071594   |
| H | 0.00006   | -2.714958 | 5.347985  | H | 0 | -3.44022  | 4.203255   |
| H | 0.000089  | -5.566514 | 2.509982  | H | 0 | -3.33479  | 6.645188   |
| H | 0.000089  | -5.566514 | -2.509982 | H | 0 | 3.33479   | 6.645188   |
| H | 0.000089  | -7.717762 | 1.233888  | C | 0 | 2.467517  | 4.686101   |
| H | 0.000089  | -7.717762 | -1.233888 | H | 0 | 3.44022   | 4.203255   |
| H | 0.00006   | -2.714958 | -5.347985 | C | 0 | 5.362818  | -4.225292  |
| H | -0.000038 | 2.30427   | -5.362584 | C | 0 | 5.357776  | -1.376122  |
| H | 0.000024  | -1.444957 | -7.504638 | C | 0 | 6.557329  | -3.501057  |
| H | -0.000025 | 1.021834  | -7.51039  | C | 0 | 6.555041  | -2.095906  |
| N | 0.000016  | 1.787057  | 0         | C | 0 | 1.426398  | -8.180566  |
| H | 0.000097  | 0.778866  | 0         | C | 0 | -1.426398 | -8.180566  |
| H | -0.000249 | 7.129272  | 2.056734  | C | 0 | 0.70546   | -9.369563  |
| H | -0.000285 | 7.988601  | 0         | C | 0 | -0.70546  | -9.369563  |
| H | -0.000249 | 7.129272  | -2.056734 | C | 0 | -5.362818 | -4.225292  |
| N | -0.000236 | 6.982648  | 0         | C | 0 | -5.357776 | -1.376122  |
|   |           |           |           | C | 0 | -6.557329 | -3.501057  |
|   |           |           |           | C | 0 | -6.555041 | -2.095906  |
|   |           |           |           | H | 0 | 7.50578   | -4.030334  |
|   |           |           |           | H | 0 | 7.501632  | -1.563345  |
|   |           |           |           | H | 0 | 5.347458  | -0.291106  |
|   |           |           |           | H | 0 | 5.355819  | -5.310319  |
|   |           |           |           | H | 0 | 2.511095  | -8.170505  |
|   |           |           |           | H | 0 | -2.511095 | -8.170505  |
|   |           |           |           | H | 0 | 1.234499  | -10.317874 |
|   |           |           |           | H | 0 | -1.234499 | -10.317874 |
|   |           |           |           | H | 0 | -5.355819 | -5.310319  |
|   |           |           |           | H | 0 | -5.347458 | -0.291106  |
|   |           |           |           | H | 0 | -7.50578  | -4.030334  |
|   |           |           |           | H | 0 | -7.501632 | -1.563345  |
|   |           |           |           | N | 0 | 0         | -0.778445  |
|   |           |           |           | H | 0 | 0         | -1.792257  |
|   |           |           |           | H | 0 | 2.054811  | 11.24754   |
|   |           |           |           | H | 0 | 0         | 12.112344  |
|   |           |           |           | H | 0 | -2.054811 | 11.24754   |
|   |           |           |           | N | 0 | 0         | 11.10588   |

**Pc-A-N**

**Pc-2A-N**

|   |          |           |          |   |          |           |          |
|---|----------|-----------|----------|---|----------|-----------|----------|
| C | 0.091564 | -0.86513  | 4.230478 | C | 0.099661 | -3.444754 | 4.229448 |
| C | 0.190878 | 0.536359  | 4.250808 | C | 0.310878 | -2.054894 | 4.245122 |
| C | 0.044676 | -1.231423 | 2.80502  | C | 0.01886  | -3.810286 | 2.80618  |

|   |           |           |           |   |           |           |           |
|---|-----------|-----------|-----------|---|-----------|-----------|-----------|
| C | -0.185087 | -4.276372 | -0.702501 | C | -0.45815  | -6.821525 | -0.703464 |
| C | -0.185087 | -4.276372 | 0.702501  | C | -0.45815  | -6.821525 | 0.703464  |
| C | -0.109392 | -2.884404 | 1.151593  | C | -0.269648 | -5.443601 | 1.15127   |
| C | 0.190878  | 0.536359  | -4.250808 | C | 0.310878  | -2.054894 | -4.245122 |
| C | 0.091564  | -0.86513  | -4.230478 | C | 0.099661  | -3.444754 | -4.229448 |
| C | 0.208792  | 0.959473  | -2.837238 | C | 0.358509  | -1.63951  | -2.831085 |
| C | 0.044676  | -1.231423 | -2.80502  | C | 0.01886   | -3.810286 | -2.80618  |
| C | 0.004227  | 3.929078  | -0.73205  | C | 0.417872  | 1.354967  | -0.729119 |
| C | 0.004227  | 3.929078  | 0.73205   | C | 0.417872  | 1.354967  | 0.729119  |
| C | 0.276659  | 2.574794  | -1.154227 | C | 0.561013  | -0.030033 | -1.154831 |
| C | 0.276659  | 2.574794  | 1.154227  | C | 0.561013  | -0.030033 | 1.154831  |
| C | 0.208792  | 0.959473  | 2.837238  | C | 0.358509  | -1.63951  | 2.831085  |
| C | -0.109392 | -2.884404 | -1.151593 | C | -0.269648 | -5.443601 | -1.15127  |
| N | -0.079779 | -2.110543 | 0         | N | -0.176558 | -4.675537 | 0         |
| N | 0.120971  | -0.161131 | 2.015699  | N | 0.179545  | -2.743413 | 2.0148    |
| N | 0.120971  | -0.161131 | -2.015699 | N | 0.179545  | -2.743413 | -2.0148   |
| H | -0.060333 | -1.094001 | 0         | H | -0.076018 | -3.66391  | 0         |
| N | -0.065306 | -2.524837 | 2.40625   | N | -0.195276 | -5.085091 | 2.408837  |
| N | 0.255477  | 2.21537   | 2.467011  | N | 0.506077  | -0.384554 | 2.460517  |
| N | 0.255477  | 2.21537   | -2.467011 | N | 0.506077  | -0.384554 | -2.460517 |
| N | -0.065306 | -2.524837 | -2.40625  | N | -0.195276 | -5.085091 | -2.408837 |
| C | -0.231189 | 4.991211  | -1.592662 | C | 0.28628   | 2.419474  | -1.585242 |
| C | -0.494017 | 6.326788  | -1.265203 | C | 0.149424  | 3.80628   | -1.30659  |
| C | -0.609584 | 6.911034  | 0         | C | 0.088014  | 4.424034  | 0         |
| C | -0.494017 | 6.326788  | 1.265203  | C | 0.149424  | 3.80628   | 1.30659   |
| C | -0.231189 | 4.991211  | 1.592662  | C | 0.28628   | 2.419474  | 1.585242  |
| H | -0.196442 | 4.734177  | 2.648904  | H | 0.296042  | 2.1448    | 2.637838  |
| H | -0.196442 | 4.734177  | -2.648904 | H | 0.296042  | 2.1448    | -2.637838 |
| C | 0.047217  | -1.606877 | 5.406634  | C | -0.584329 | 11.047984 | 0         |
| C | 0.253266  | 1.232602  | 5.453055  | C | -0.523607 | 10.456604 | -1.264727 |
| C | 0.109443  | -0.908501 | 6.616344  | C | -0.38531  | 9.101076  | -1.588747 |
| C | 0.210883  | 0.491035  | 6.638214  | C | -0.523607 | 10.456604 | 1.264727  |
| C | -0.24121  | -5.466474 | 1.424436  | C | -0.273944 | 8.003154  | -0.745555 |
| C | -0.24121  | -5.466474 | -1.424436 | C | -0.38531  | 9.101076  | 1.588747  |
| C | -0.300859 | -6.659119 | 0.702923  | C | -0.273944 | 8.003154  | 0.745555  |
| C | -0.300859 | -6.659119 | -0.702923 | H | -0.362481 | 8.877748  | -2.65392  |
| C | 0.047217  | -1.606877 | -5.406634 | H | -0.362481 | 8.877748  | 2.65392   |
| C | 0.253266  | 1.232602  | -5.453055 | C | -0.136676 | 6.646133  | -1.163726 |
| C | 0.109443  | -0.908501 | -6.616344 | C | -0.054514 | 5.834618  | 0         |
| C | 0.210883  | 0.491035  | -6.638214 | C | -0.136676 | 6.646133  | 1.163726  |
| H | 0.079701  | -1.454707 | 7.554639  | C | 0.063073  | 4.65176   | -2.467371 |
| H | 0.256969  | 1.005174  | 7.593984  | C | -0.074265 | 6.018371  | -2.425775 |

|   |           |           |           |   |           |           |           |
|---|-----------|-----------|-----------|---|-----------|-----------|-----------|
| H | 0.331473  | 2.314933  | 5.464585  | C | -0.074265 | 6.018371  | 2.425775  |
| H | -0.031264 | -2.68884  | 5.379118  | H | 0.111704  | 4.157776  | -3.43272  |
| H | -0.237995 | -5.452888 | 2.508953  | H | -0.132463 | 6.586559  | -3.349507 |
| H | -0.237995 | -5.452888 | -2.508953 | H | -0.132463 | 6.586559  | 3.349507  |
| H | -0.347458 | -7.605176 | 1.233807  | C | 0.063073  | 4.65176   | 2.467371  |
| H | -0.347458 | -7.605176 | -1.233807 | H | 0.111704  | 4.157776  | 3.43272   |
| H | -0.031264 | -2.68884  | -5.379118 | C | 0.000045  | -4.175879 | 5.409278  |
| H | 0.331473  | 2.314933  | -5.464585 | C | 0.432406  | -1.36222  | 5.445511  |
| H | 0.079701  | -1.454707 | -7.554639 | C | 0.12164   | -3.481037 | 6.61621   |
| H | 0.256969  | 1.005174  | -7.593984 | C | 0.334559  | -2.093525 | 6.633302  |
| H | 0.793919  | 0.774668  | 0         | C | -0.611894 | -8.005215 | 1.424458  |
| C | 0.498256  | 1.802597  | 0         | C | -0.611894 | -8.005215 | -1.424458 |
| H | -0.63007  | 7.000012  | -2.107954 | C | -0.769098 | -9.187902 | 0.703616  |
|   |           |           |           | C | -0.769098 | -9.187902 | -0.703616 |
|   |           |           |           | C | 0.000045  | -4.175879 | -5.409278 |
|   |           |           |           | C | 0.432406  | -1.36222  | -5.445511 |
|   |           |           |           | C | 0.12164   | -3.481037 | -6.61621  |
|   |           |           |           | C | 0.334559  | -2.093525 | -6.633302 |
|   |           |           |           | H | 0.051219  | -4.020224 | 7.556535  |
|   |           |           |           | H | 0.424404  | -1.581783 | 7.587381  |
|   |           |           |           | H | 0.596972  | -0.289493 | 5.452327  |
|   |           |           |           | H | -0.164972 | -5.248233 | 5.385776  |
|   |           |           |           | H | -0.607683 | -7.992034 | 2.509056  |
|   |           |           |           | H | -0.607683 | -7.992034 | -2.509056 |
|   |           |           |           | H | -0.893231 | -10.12722 | 1.234231  |
|   |           |           |           | H | -0.893231 | -10.12722 | -1.234231 |
|   |           |           |           | H | -0.164972 | -5.248233 | -5.385776 |
|   |           |           |           | H | 0.596972  | -0.289493 | -5.452327 |
|   |           |           |           | H | 0.051219  | -4.020224 | -7.556535 |
|   |           |           |           | H | 0.424404  | -1.581783 | -7.587381 |
|   |           |           |           | H | 0.906751  | -1.868881 | 0         |
|   |           |           |           | C | 0.71122   | -0.817552 | 0         |
|   |           |           |           | H | -0.592902 | 11.137198 | 2.108877  |
|   |           |           |           | H | -0.694771 | 12.130409 | 0         |
|   |           |           |           | H | -0.592902 | 11.137198 | -2.108877 |

**P<sub>N</sub>-3A-2A**

|   |           |           |           |
|---|-----------|-----------|-----------|
| C | 9.753109  | 1.273176  | -0.15567  |
| C | 9.811367  | -0.189958 | -0.130345 |
| C | 11.072666 | 1.747419  | -0.173025 |
| C | 3.737593  | -3.874032 | 0.114226  |
| C | 5.075139  | -3.833854 | -0.018599 |

**Mg-P<sub>N</sub>-3A-2A**

|   |            |           |   |
|---|------------|-----------|---|
| C | -9.766785  | -0.004518 | 0 |
| C | -9.63966   | 1.448687  | 0 |
| C | -11.136947 | -0.310871 | 0 |
| C | -3.122418  | 4.338227  | 0 |
| C | -4.467007  | 4.487803  | 0 |



|   |           |           |           |   |            |           |   |
|---|-----------|-----------|-----------|---|------------|-----------|---|
| C | 5.45018   | -2.393533 | -0.006157 | C | -5.051094  | 3.13287   | 0 |
| C | 1.520953  | 1.421768  | 0.357789  | C | -1.58743   | -1.191434 | 0 |
| C | 1.603186  | -0.886305 | 0.374839  | C | -1.375215  | 1.075902  | 0 |
| C | 3.438711  | 4.547869  | 0.050148  | C | -3.905824  | -4.075922 | 0 |
| C | 4.775147  | 4.603533  | -0.087335 | C | -5.254169  | -3.978679 | 0 |
| C | 3.098434  | 3.10981   | 0.161699  | C | -3.369426  | -2.704331 | 0 |
| C | 5.254314  | 3.195198  | -0.057068 | C | -5.582544  | -2.539121 | 0 |
| C | 11.217569 | -0.567925 | -0.131433 | C | -10.986865 | 2.002577  | 0 |
| C | 3.293606  | -2.463097 | 0.205877  | C | -2.84557   | 2.893008  | 0 |
| N | 4.33784   | -1.610068 | 0.133665  | N | -4.027097  | 2.2141    | 0 |
| N | 6.712448  | -2.062039 | -0.106923 | N | -6.341653  | 2.929095  | 0 |
| N | 6.535448  | 2.956411  | -0.159063 | N | -6.813551  | -2.107745 | 0 |
| N | 1.814245  | 2.722879  | 0.272334  | N | -2.052197  | -2.457651 | 0 |
| N | 1.987118  | -2.166755 | 0.309726  | N | -1.596879  | 2.40632   | 0 |
| C | 8.619031  | 2.073078  | -0.17163  | C | -8.744396  | -0.944813 | 0 |
| C | 8.746991  | -1.045576 | -0.122734 | C | -8.471949  | 2.161406  | 0 |
| H | 8.96116   | -2.109604 | -0.119594 | H | -8.555515  | 3.244187  | 0 |
| H | 8.791997  | 3.145197  | -0.201902 | H | -9.062246  | -1.984545 | 0 |
| C | 0.180081  | -0.507038 | 0.321129  | C | 0          | 0.53253   | 0 |
| C | 0.127712  | 0.941314  | 0.311673  | C | -0.135333  | -0.912665 | 0 |
| C | -0.846919 | -1.406958 | 0.270477  | C | 1.138552   | 1.289735  | 0 |
| C | -2.256673 | -1.179984 | 0.222797  | C | 2.508041   | 0.881453  | 0 |
| C | -2.924701 | 0.104628  | 0.1971    | C | 3.005427   | -0.478723 | 0 |
| C | -2.351827 | 1.434447  | 0.210037  | C | 2.263705   | -1.722568 | 0 |
| C | -0.961572 | 1.763841  | 0.252168  | C | 0.842238   | -1.868611 | 0 |
| H | -0.719279 | 2.824374  | 0.237866  | H | 0.467704   | -2.890234 | 0 |
| H | -0.528205 | -2.447156 | 0.268891  | H | 0.960985   | 2.363258  | 0 |
| C | -9.629268 | -0.143367 | -0.044464 | C | 9.689771   | -1.10729  | 0 |
| C | -8.959703 | -1.424471 | -0.016507 | C | 9.192433   | 0.250212  | 0 |
| C | -7.557861 | -1.646676 | 0.03645   | C | 7.830626   | 0.654243  | 0 |
| C | -9.056639 | 1.183919  | -0.025425 | C | 8.947962   | -2.348209 | 0 |
| C | -6.501603 | -0.765205 | 0.072908  | C | 6.667329   | -0.081413 | 0 |
| C | -7.674614 | 1.51044   | 0.024664  | C | 7.534762   | -2.491002 | 0 |
| C | -6.556045 | 0.710052  | 0.066929  | C | 6.529156   | -1.551212 | 0 |
| H | -7.277731 | -2.698133 | 0.049271  | H | 7.690159   | 1.733353  | 0 |
| H | -7.473449 | 2.579869  | 0.029512  | H | 7.195355   | -3.524932 | 0 |
| C | -5.110292 | -1.138412 | 0.123772  | C | 5.335381   | 0.469573  | 0 |
| C | -4.338686 | 0.053013  | 0.147847  | C | 4.414702   | -0.611095 | 0 |
| C | -5.195192 | 1.184668  | 0.11382   | C | 5.117948   | -1.844374 | 0 |
| C | -3.058583 | -2.361947 | 0.196694  | C | 3.457951   | 1.948865  | 0 |
| C | -4.440924 | -2.367662 | 0.149167  | C | 4.830228   | 1.775318  | 0 |
| C | -4.617026 | 2.459438  | 0.12818   | C | 4.378629   | -3.033278 | 0 |

|   |            |           |           |   |            |           |   |
|---|------------|-----------|-----------|---|------------|-----------|---|
| H | -2.531927  | -3.310687 | 0.21616   | H | 3.058794   | 2.958113  | 0 |
| H | -4.975911  | -3.312792 | 0.132067  | H | 5.483562   | 2.643156  | 0 |
| H | -5.219551  | 3.362942  | 0.103249  | H | 4.859011   | -4.007555 | 0 |
| C | -3.23766   | 2.554519  | 0.174269  | C | 2.998076   | -2.948252 | 0 |
| H | -2.781642  | 3.539239  | 0.184465  | H | 2.417866   | -3.865457 | 0 |
| C | -15.634744 | -1.635178 | -0.269477 | C | 15.843487  | -0.416081 | 0 |
| C | -14.26232  | -1.907119 | -0.216403 | C | 14.517422  | 0.034058  | 0 |
| C | -15.730097 | 0.893019  | -0.278557 | C | 15.606341  | -2.934831 | 0 |
| C | -13.192111 | -1.022158 | -0.177778 | C | 13.339617  | -0.702506 | 0 |
| C | -14.381646 | 1.268193  | -0.227861 | C | 14.219622  | -3.129522 | 0 |
| C | -13.248053 | 0.466714  | -0.183052 | C | 13.199957  | -2.186037 | 0 |
| H | -16.286242 | -2.504271 | -0.292366 | H | 16.603745  | 0.360032  | 0 |
| H | -13.998186 | -2.963049 | -0.203916 | H | 14.394062  | 1.115586  | 0 |
| H | -16.445026 | 1.710541  | -0.30755  | H | 16.208402  | -3.83919  | 0 |
| H | -14.197881 | 2.341088  | -0.223075 | H | 13.896528  | -4.16901  | 0 |
| C | -11.814406 | -1.390051 | -0.124655 | C | 12.020743  | -0.157285 | 0 |
| C | -11.043698 | -0.196076 | -0.09797  | C | 11.099955  | -1.240019 | 0 |
| C | -11.90118  | 0.936911  | -0.132718 | C | 11.802571  | -2.47557  | 0 |
| C | -9.763738  | -2.616651 | -0.044145 | C | 10.146175  | 1.326939  | 0 |
| C | -11.137141 | -2.626848 | -0.096246 | C | 11.510105  | 1.157516  | 0 |
| C | -9.947146  | 2.312722  | -0.06066  | C | 9.684042   | -3.583998 | 0 |
| C | -11.317671 | 2.22069   | -0.112596 | C | 11.055607  | -3.672036 | 0 |
| H | -9.234603  | -3.56443  | -0.021973 | H | 9.745072   | 2.335833  | 0 |
| H | -11.671851 | -3.571707 | -0.114427 | H | 12.163985  | 2.024421  | 0 |
| H | -9.49014   | 3.297368  | -0.044887 | H | 9.101709   | -4.500319 | 0 |
| H | -11.921228 | 3.123076  | -0.136947 | H | 11.536273  | -4.645711 | 0 |
| H | -17.361974 | -0.434446 | -0.338213 | H | 17.399606  | -1.833104 | 0 |
| H | 3.424217   | 0.334247  | 0.531762  | C | -7.085342  | 1.741662  | 0 |
| C | 7.319038   | -0.817089 | -0.114605 | N | -4.405888  | -1.821095 | 0 |
| N | 4.199321   | 2.333689  | 0.097144  | C | -11.899365 | 0.879153  | 0 |
| C | 11.978187  | 0.661004  | -0.157714 | C | -7.327608  | -0.800589 | 0 |
| C | 7.23337    | 1.757721  | -0.147507 | C | -6.55016   | 0.41717   | 0 |
| C | 6.669888   | 0.439929  | -0.126551 | H | -11.551089 | -1.312501 | 0 |
| H | 5.586716   | 0.402807  | -0.129024 | C | -2.312969  | 0.019827  | 0 |
| H | 11.358668  | 2.792437  | -0.195063 | C | 16.316392  | -1.731113 | 0 |
| C | 2.3579     | 0.29591   | 0.457402  | C | -13.318651 | 0.887618  | 0 |
| C | -16.27554  | -0.393351 | -0.296798 | C | -11.293532 | 3.373951  | 0 |
| C | 13.388379  | 0.830586  | -0.168547 | C | -14.171479 | 1.963699  | 0 |
| C | 11.693324  | -1.89075  | -0.109423 | C | -12.537058 | 3.986677  | 0 |
| C | 14.369114  | -0.129366 | -0.157331 | C | -13.820475 | 3.411477  | 0 |
| C | 13.002667  | -2.343503 | -0.109458 | C | -15.600435 | 1.890273  | 0 |
| C | 14.204006  | -1.611494 | -0.129973 | C | -15.028548 | 4.111335  | 0 |

|   |           |           |           |    |            |           |   |
|---|-----------|-----------|-----------|----|------------|-----------|---|
| C | 15.777703 | 0.123868  | -0.170136 | C  | -16.104149 | 3.18085   | 0 |
| C | 15.489656 | -2.15219  | -0.127931 | H  | -13.786174 | -0.096887 | 0 |
| C | 16.439371 | -1.092201 | -0.152433 | H  | -10.443142 | 4.049994  | 0 |
| H | 13.728664 | 1.865717  | -0.188862 | H  | -12.524281 | 5.075652  | 0 |
| H | 10.934286 | -2.667682 | -0.089376 | H  | -15.123525 | 5.190493  | 0 |
| H | 13.126441 | -3.425237 | -0.090378 | H  | -16.171209 | 0.970136  | 0 |
| H | 15.721079 | -3.210319 | -0.110334 | H  | -17.154887 | 3.447182  | 0 |
| H | 16.227577 | 1.108486  | -0.19031  | H  | -5.997049  | -4.764577 | 0 |
| H | 17.515316 | -1.224096 | -0.156479 | H  | -3.285124  | -4.961696 | 0 |
| H | 5.42675   | 5.458992  | -0.202606 | H  | -5.053814  | 5.396225  | 0 |
| H | 2.710977  | 5.34778   | 0.078301  | H  | -2.351328  | 5.096657  | 0 |
| H | 5.787455  | -4.641271 | -0.120777 | Mg | -4.398158  | 0.2142    | 0 |
| H | 3.069907  | -4.724336 | 0.151463  |    |            |           |   |

**Zn-P<sub>N</sub>-3A-2A**

|   |            |           |           |
|---|------------|-----------|-----------|
| C | -9.454189  | 1.239184  | 0.015394  |
| C | -9.511176  | -0.212511 | -0.054708 |
| C | -10.772449 | 1.716687  | 0.070017  |
| C | -3.460839  | -3.924085 | -0.103476 |
| C | -4.809559  | -3.897489 | -0.183388 |
| C | -5.204872  | -2.475534 | -0.189475 |
| C | -1.303719  | 1.373406  | 0.162662  |
| C | -1.381913  | -0.891422 | 0.182671  |
| C | -3.163855  | 4.541816  | -0.163243 |
| C | -4.511449  | 4.6143    | -0.216821 |
| C | -2.818154  | 3.112057  | -0.096926 |
| C | -5.011472  | 3.225099  | -0.186941 |
| C | -10.915256 | -0.596723 | -0.044483 |
| C | -3.011582  | -2.523554 | -0.063997 |
| N | -4.080563  | -1.694487 | -0.161704 |
| N | -6.45206   | -2.101984 | -0.160553 |
| N | -6.280431  | 2.947844  | -0.126153 |
| N | -1.559496  | 2.684496  | 0.022501  |
| N | -1.727577  | -2.183932 | 0.061368  |
| C | -8.310746  | 2.02337   | 0.003113  |
| C | -8.43488   | -1.050244 | -0.111108 |
| H | -8.646724  | -2.113577 | -0.162272 |
| H | -8.480786  | 3.096109  | 0.03346   |
| C | 0.048239   | -0.52851  | 0.131287  |
| C | 0.097892   | 0.911514  | 0.116686  |
| C | 1.076204   | -1.430166 | 0.09834   |
| C | 2.485855   | -1.201659 | 0.087965  |

**Ni-P<sub>N</sub>-3A-2A**

|   |            |           |           |
|---|------------|-----------|-----------|
| C | -9.404431  | 1.030207  | -0.581449 |
| C | -9.399373  | -0.20111  | 0.188695  |
| C | -10.739347 | 1.438968  | -0.727092 |
| C | -3.504343  | -3.85193  | -0.816061 |
| C | -4.821582  | -3.843821 | -0.530144 |
| C | -5.204225  | -2.445151 | -0.353781 |
| C | -1.38577   | 1.301019  | -0.136634 |
| C | -1.423217  | -0.904615 | -0.577926 |
| C | -3.297046  | 4.360652  | -0.293702 |
| C | -4.590195  | 4.402037  | -0.66699  |
| C | -2.935997  | 2.951525  | -0.174225 |
| C | -5.062104  | 3.018134  | -0.701448 |
| C | -10.777504 | -0.504189 | 0.543692  |
| C | -3.053158  | -2.466502 | -0.764225 |
| N | -4.113442  | -1.615668 | -0.537321 |
| N | -6.418171  | -2.121563 | -0.029029 |
| N | -6.300059  | 2.750403  | -0.963762 |
| N | -1.672286  | 2.595834  | 0.006308  |
| N | -1.763765  | -2.173723 | -0.815254 |
| C | -8.280565  | 1.732861  | -0.987579 |
| C | -8.297288  | -0.978217 | 0.396645  |
| H | -8.453048  | -1.937495 | 0.882455  |
| H | -8.469433  | 2.688744  | -1.469172 |
| C | -0.011742  | -0.545034 | -0.442768 |
| C | 0.013688   | 0.862685  | -0.133814 |
| C | 1.033165   | -1.419294 | -0.584231 |
| C | 2.434143   | -1.184734 | -0.461974 |

|   |           |           |           |   |           |           |           |
|---|-----------|-----------|-----------|---|-----------|-----------|-----------|
| C | 3.153425  | 0.083809  | 0.075021  | C | 3.077363  | 0.073598  | -0.140451 |
| C | 2.576683  | 1.412805  | 0.067208  | C | 2.478709  | 1.365934  | 0.118752  |
| C | 1.186423  | 1.73908   | 0.071757  | C | 1.084922  | 1.678991  | 0.102755  |
| H | 0.942344  | 2.798612  | 0.039363  | H | 0.825561  | 2.71544   | 0.306238  |
| H | 0.759128  | -2.470582 | 0.083784  | H | 0.737326  | -2.43798  | -0.824149 |
| C | 9.862191  | -0.152599 | 0.001338  | C | 9.780048  | -0.115244 | 0.180348  |
| C | 9.193974  | -1.434621 | 0.016631  | C | 9.136885  | -1.368921 | -0.146987 |
| C | 7.792029  | -1.659425 | 0.035533  | C | 7.742103  | -1.597664 | -0.273797 |
| C | 9.286184  | 1.173854  | 0.001235  | C | 9.181043  | 1.171859  | 0.44908   |
| C | 6.733093  | -0.779546 | 0.043034  | C | 6.667105  | -0.747798 | -0.133643 |
| C | 7.90381   | 1.497997  | 0.015036  | C | 7.793071  | 1.478843  | 0.44441   |
| C | 6.78486   | 0.695336  | 0.032593  | C | 6.692372  | 0.69082   | 0.200149  |
| H | 7.513511  | -2.711339 | 0.044896  | H | 7.483868  | -2.624278 | -0.526005 |
| H | 7.700529  | 2.567022  | 0.010525  | H | 7.570475  | 2.518864  | 0.674647  |
| C | 5.341952  | -1.155206 | 0.060571  | C | 5.286655  | -1.121572 | -0.294158 |
| C | 4.567331  | 0.034611  | 0.060752  | C | 4.490599  | 0.033613  | -0.071703 |
| C | 5.423397  | 1.167404  | 0.043214  | C | 5.323707  | 1.142923  | 0.22886   |
| C | 3.290853  | -2.382255 | 0.085323  | C | 3.261681  | -2.331208 | -0.681408 |
| C | 4.673905  | -2.385529 | 0.073248  | C | 4.641313  | -2.325796 | -0.606437 |
| C | 4.842277  | 2.441375  | 0.036365  | C | 4.720984  | 2.381817  | 0.479013  |
| H | 2.765516  | -3.331932 | 0.094076  | H | 2.754453  | -3.260287 | -0.92123  |
| H | 5.210839  | -3.329784 | 0.072946  | H | 5.195247  | -3.242511 | -0.7875   |
| H | 5.443808  | 3.345853  | 0.022341  | H | 5.305371  | 3.266768  | 0.714389  |
| C | 3.462375  | 2.534274  | 0.046571  | C | 3.341971  | 2.464927  | 0.419044  |
| H | 3.004566  | 3.518241  | 0.039729  | H | 2.866794  | 3.421889  | 0.609791  |
| C | 15.874061 | -1.633469 | -0.069367 | C | 15.811463 | -1.517495 | 0.17559   |
| C | 14.501145 | -1.908024 | -0.049743 | C | 14.446644 | -1.794174 | 0.037356  |
| C | 15.964804 | 0.894706  | -0.082756 | C | 15.854171 | 0.944571  | 0.757077  |
| C | 13.428657 | -1.024919 | -0.039949 | C | 13.357797 | -0.941955 | 0.178996  |
| C | 14.615375 | 1.267567  | -0.066814 | C | 14.498039 | 1.298241  | 0.766726  |
| C | 13.481811 | 0.463933  | -0.048084 | C | 13.383236 | 0.508683  | 0.520516  |
| H | 16.527384 | -2.501539 | -0.073859 | H | 16.481009 | -2.357689 | 0.013989  |
| H | 14.238741 | -2.964417 | -0.041132 | H | 14.204815 | -2.824498 | -0.217462 |
| H | 16.678858 | 1.713453  | -0.09609  | H | 16.550992 | 1.74677   | 0.983527  |
| H | 14.429594 | 2.34012   | -0.069605 | H | 14.291752 | 2.341085  | 1.000946  |
| C | 12.050743 | -1.395214 | -0.02014  | C | 11.989993 | -1.311294 | 0.019009  |
| C | 11.277295 | -0.202782 | -0.016293 | C | 11.19447  | -0.155139 | 0.247151  |
| C | 12.133833 | 0.931544  | -0.032992 | C | 12.027389 | 0.955159  | 0.552055  |
| C | 10.000871 | -2.625506 | 0.012636  | C | 9.966316  | -2.523242 | -0.372986 |
| C | 11.375063 | -2.63318  | -0.005079 | C | 11.338118 | -2.521797 | -0.299504 |
| C | 10.176082 | 2.304289  | -0.015329 | C | 10.046966 | 2.278569  | 0.755241  |
| C | 11.547306 | 2.214514  | -0.031929 | C | 11.418214 | 2.200292  | 0.811135  |

|    |            |           |           |    |            |           |           |
|----|------------|-----------|-----------|----|------------|-----------|-----------|
| H  | 9.473033   | -3.574209 | 0.024398  | H  | 9.457138   | -3.450629 | -0.616897 |
| H  | 11.9118    | -3.577096 | -0.007141 | H  | 11.892198  | -3.437233 | -0.484274 |
| H  | 9.717098   | 3.28816   | -0.01468  | H  | 9.569537   | 3.233411  | 0.953039  |
| H  | 12.149742  | 3.11793   | -0.043966 | H  | 12.002801  | 3.083776  | 1.049766  |
| H  | 17.600491  | -0.430008 | -0.09813  | H  | 17.51225   | -0.333051 | 0.545753  |
| C  | -7.000468  | -0.82206  | -0.088743 | C  | -6.91808   | -0.843289 | -0.034504 |
| N  | -3.945165  | 2.362731  | -0.159183 | N  | -4.027914  | 2.145426  | -0.388223 |
| C  | -11.678242 | 0.630389  | 0.036401  | C  | -11.59331  | 0.532616  | -0.05435  |
| C  | -6.919928  | 1.707685  | -0.043966 | C  | -6.887648  | 1.515729  | -0.766171 |
| C  | -6.273776  | 0.409608  | 0.003435  | C  | -6.170176  | 0.314475  | -0.416173 |
| H  | -11.05762  | 2.760811  | 0.125369  | H  | -11.069671 | 2.325826  | -1.255378 |
| C  | -2.186885  | 0.271184  | 0.328758  | C  | -2.27126   | 0.218893  | -0.384959 |
| C  | 16.513299  | -0.390923 | -0.083895 | C  | 16.425858  | -0.302146 | 0.494467  |
| C  | -13.087377 | 0.795942  | 0.077156  | C  | -13.002873 | 0.68414   | -0.009679 |
| C  | -11.388342 | -1.91841  | -0.102309 | C  | -11.184912 | -1.602579 | 1.317011  |
| C  | -14.066703 | -0.166254 | 0.05029   | C  | -13.933075 | -0.112486 | 0.612907  |
| C  | -12.697558 | -2.373532 | -0.095977 | C  | -12.467946 | -1.969756 | 1.694856  |
| C  | -13.898958 | -1.645238 | -0.030273 | C  | -13.696639 | -1.348979 | 1.410348  |
| C  | -15.474915 | 0.082406  | 0.095324  | C  | -15.345808 | 0.108195  | 0.61299   |
| C  | -15.184271 | -2.189556 | -0.029255 | C  | -14.951461 | -1.79125  | 1.835783  |
| C  | -16.135129 | -1.134511 | 0.047194  | C  | -15.946851 | -0.902024 | 1.347592  |
| H  | -13.429793 | 1.828831  | 0.138254  | H  | -13.39248  | 1.550907  | -0.543336 |
| H  | -10.62736  | -2.691717 | -0.16019  | H  | -10.38918  | -2.251444 | 1.673068  |
| H  | -12.820173 | -3.454303 | -0.149781 | H  | -12.540128 | -2.870338 | 2.302892  |
| H  | -15.413157 | -3.247246 | -0.079063 | H  | -15.129185 | -2.672367 | 2.440484  |
| H  | -15.926574 | 1.064575  | 0.156553  | H  | -15.8419   | 0.932758  | 0.116545  |
| H  | -17.210613 | -1.268925 | 0.064736  | H  | -17.011195 | -1.003545 | 1.525893  |
| H  | -5.152203  | 5.484483  | -0.25674  | H  | -5.229692  | 5.246706  | -0.87991  |
| H  | -2.433638  | 5.33948   | -0.147854 | H  | -2.589671  | 5.163302  | -0.139815 |
| H  | -5.512179  | -4.7189   | -0.215358 | H  | -5.5208    | -4.662381 | -0.435916 |
| H  | -2.792546  | -4.773184 | -0.058144 | H  | -2.837358  | -4.681149 | -1.00514  |
| Zn | -4.205813  | 0.339663  | 0.16286   | Ni | -4.159002  | 0.265793  | -0.437859 |

**P<sub>N</sub>-4A-A**

|   |           |            |           |
|---|-----------|------------|-----------|
| C | 0.093196  | -9.822777  | 4.216654  |
| C | -0.178701 | -11.148348 | 4.20599   |
| C | -0.276439 | -11.528974 | 2.787552  |
| C | 0.487033  | -7.795847  | -1.155977 |
| C | 0.487033  | -7.795847  | 1.155977  |
| C | 0.093196  | -9.822777  | -4.216654 |
| C | -0.178701 | -11.148348 | -4.20599  |
| C | 0.173438  | -9.40677   | -2.806356 |

**Mg-P<sub>N</sub>-4A-A**

|   |           |           |           |
|---|-----------|-----------|-----------|
| C | 9.656435  | -4.200707 | 0.031705  |
| C | 11.010472 | -4.194667 | 0.182517  |
| C | 11.436243 | -2.796567 | 0.157249  |
| C | 7.551281  | 1.1468    | -0.297234 |
| C | 7.551268  | -1.146887 | -0.297388 |
| C | 9.656313  | 4.200696  | 0.032347  |
| C | 11.010333 | 4.194709  | 0.183203  |
| C | 9.220642  | 2.809107  | -0.095016 |

|   |           |            |           |   |           |           |           |
|---|-----------|------------|-----------|---|-----------|-----------|-----------|
| C | -0.276439 | -11.528974 | -2.787552 | C | 11.436199 | 2.79663   | 0.15757   |
| C | 0.173438  | -9.40677   | 2.806356  | C | 9.220687  | -2.809121 | -0.095279 |
| N | -0.056526 | -10.473148 | 1.978886  | N | 10.340904 | -2.007298 | -0.024541 |
| N | -0.556423 | -12.78775  | 2.407166  | N | 12.71026  | -2.396247 | 0.31925   |
| N | -0.556423 | -12.78775  | -2.407166 | N | 12.710227 | 2.396363  | 0.319594  |
| N | 0.395897  | -8.14375   | -2.453422 | N | 7.939657  | 2.443889  | -0.209124 |
| N | 0.395897  | -8.14375   | 2.453422  | N | 7.939659  | -2.443951 | -0.20943  |
| C | 0.435667  | -6.393944  | 0.727774  | C | 6.136034  | -0.731638 | -0.261496 |
| C | 0.435667  | -6.393944  | -0.727774 | C | 6.136042  | 0.73157   | -0.261453 |
| C | 0.374527  | -5.330442  | 1.585393  | C | 5.067897  | -1.585157 | -0.219426 |
| C | 0.333998  | -3.930126  | 1.30779   | C | 3.66658   | -1.307346 | -0.19344  |
| C | 0.316558  | -3.309019  | 0         | C | 3.044372  | -0.000031 | -0.183618 |
| C | 0.333998  | -3.930126  | -1.30779  | C | 3.666588  | 1.30728   | -0.193411 |
| C | 0.374527  | -5.330442  | -1.585393 | C | 5.067904  | 1.58509   | -0.21936  |
| H | 0.362488  | -5.606903  | -2.637569 | H | 5.339921  | 2.638778  | -0.20863  |
| H | 0.362488  | -5.606903  | 2.637569  | H | 5.339912  | -2.638847 | -0.208762 |
| C | 0.113918  | 3.405539   | 0         | C | -3.672489 | -0.000013 | -0.061732 |
| C | 0.132824  | 2.783673   | 1.305958  | C | -3.050214 | -1.305814 | -0.072571 |
| C | 0.174845  | 1.386297   | 1.579537  | C | -1.652637 | -1.579492 | -0.097187 |
| C | 0.132824  | 2.783673   | -1.305958 | C | -3.050208 | 1.305785  | -0.07275  |
| C | 0.207115  | 0.300435   | 0.738947  | C | -0.566272 | -0.738812 | -0.116466 |
| C | 0.174845  | 1.386297   | -1.579537 | C | -1.652633 | 1.579457  | -0.097299 |
| C | 0.207115  | 0.300435   | -0.738947 | C | -0.566267 | 0.73877   | -0.116486 |
| H | 0.182144  | 1.146014   | 2.641007  | H | -1.412229 | -2.640928 | -0.101422 |
| H | 0.182144  | 1.146014   | -2.641007 | H | -1.41222  | 2.640891  | -0.101589 |
| C | 0.248242  | -1.078796  | 1.162779  | C | 0.813429  | -1.162419 | -0.141153 |
| C | 0.273168  | -1.893129  | 0         | C | 1.628252  | -0.000028 | -0.156698 |
| C | 0.248242  | -1.078796  | -1.162779 | C | 0.813432  | 1.162367  | -0.141164 |
| C | 0.306225  | -3.085332  | 2.459936  | C | 2.821008  | -2.459015 | -0.174943 |
| C | 0.265314  | -1.703406  | 2.415103  | C | 1.438462  | -2.414383 | -0.150312 |
| C | 0.265314  | -1.703406  | -2.415103 | C | 1.438474  | 2.41433   | -0.15031  |
| H | 0.319037  | -3.576995  | 3.42752   | H | 3.312584  | -3.426724 | -0.181851 |
| H | 0.246664  | -1.133924  | 3.339937  | H | 0.869042  | -3.33944  | -0.138205 |
| H | 0.246664  | -1.133924  | -3.339937 | H | 0.869059  | 3.339389  | -0.138202 |
| C | 0.306225  | -3.085332  | -2.459936 | C | 2.821018  | 2.458954  | -0.174916 |
| H | 0.319037  | -3.576995  | -3.42752  | H | 3.312599  | 3.42666   | -0.181801 |
| C | -0.071245 | 9.49248    | 1.305626  | C | -9.761199 | -1.305579 | 0.043572  |
| C | -0.028087 | 8.099162   | 1.579903  | C | -8.367586 | -1.579896 | 0.019378  |
| C | -0.071245 | 9.49248    | -1.305626 | C | -9.761196 | 1.305588  | 0.043222  |
| C | 0.004893  | 7.009794   | 0.739955  | C | -7.277753 | -0.739888 | 0.000689  |
| C | -0.028087 | 8.099162   | -1.579903 | C | -8.367587 | 1.579899  | 0.019005  |
| C | 0.004893  | 7.009794   | -0.739955 | C | -7.27775  | 0.739885  | 0.000536  |

|   |           |            |           |   |            |           |           |
|---|-----------|------------|-----------|---|------------|-----------|-----------|
| H | -0.020464 | 7.859079   | 2.641526  | H | -8.127394  | -2.641503 | 0.015196  |
| H | -0.020464 | 7.859079   | -2.641526 | H | -8.127393  | 2.641504  | 0.014579  |
| C | 0.046615  | 5.635418   | 1.163944  | C | -5.903017  | -1.16384  | -0.022961 |
| C | 0.071134  | 4.820903   | 0         | C | -5.088259  | -0.000009 | -0.037099 |
| C | 0.046615  | 5.635418   | -1.163944 | C | -5.903019  | 1.163826  | -0.023188 |
| C | 0.107626  | 3.629385   | 2.461869  | C | -3.896338  | -2.461825 | -0.057829 |
| C | 0.065838  | 5.00818    | 2.418923  | C | -5.275469  | -2.418817 | -0.033801 |
| C | 0.107626  | 3.629385   | -2.461869 | C | -3.896334  | 2.461801  | -0.058229 |
| C | 0.065838  | 5.00818    | -2.418923 | C | -5.275463  | 2.418802  | -0.034241 |
| H | 0.122765  | 3.138475   | 3.43024   | H | -3.405283  | -3.430183 | -0.066446 |
| H | 0.048801  | 5.577235   | 3.343794  | H | -5.844655  | -3.343724 | -0.023888 |
| H | 0.122765  | 3.138475   | -3.43024  | H | -3.405276  | 3.430156  | -0.066988 |
| H | 0.048801  | 5.577235   | -3.343794 | H | -5.844647  | 3.343712  | -0.024515 |
| H | 0.728084  | -9.649333  | 0         | C | 13.097087  | -1.11583  | 0.344857  |
| C | -0.649018 | -13.138974 | 1.135628  | N | 10.340949  | 2.007341  | -0.024507 |
| N | -0.056526 | -10.473148 | -1.978886 | C | 13.097066  | 1.115932  | 0.345014  |
| C | -0.649018 | -13.138974 | -1.135628 | C | 8.361046   | -0.000029 | -0.382292 |
| C | 0.596139  | -8.588638  | 0         | C | -10.382558 | 0.000005  | 0.054352  |
| C | -0.090842 | 10.113558  | 0         | H | 11.679784  | -5.033627 | 0.314868  |
| H | -0.320607 | -11.828329 | 5.034931  | H | 8.985073   | -5.048543 | 0.012724  |
| H | 0.238095  | -9.158671  | 5.05798   | H | 11.679573  | 5.033685  | 0.31582   |
| H | -0.320607 | -11.828329 | -5.034931 | H | 8.984907   | 5.048503  | 0.013597  |
| H | 0.238095  | -9.158671  | -5.05798  | C | -10.609794 | 2.46717   | 0.057613  |
| C | -0.097308 | 10.340726  | -2.467124 | C | -11.799188 | 0.000009  | 0.079096  |
| C | -0.135202 | 11.529743  | 0         | C | -10.609793 | -2.467156 | 0.058304  |
| C | -0.097308 | 10.340726  | 2.467124  | C | -12.614497 | 1.164978  | 0.093067  |
| C | -0.160615 | 12.344786  | -1.165014 | C | -11.982941 | 2.426959  | 0.081659  |
| C | -0.140447 | 11.71347   | -2.426983 | C | -12.614494 | -1.164955 | 0.093408  |
| C | -0.160615 | 12.344786  | 1.165014  | C | -11.982941 | -2.426938 | 0.08236   |
| C | -0.140447 | 11.71347   | 2.426983  | H | -12.553052 | 3.351015  | 0.091305  |
| H | -0.158007 | 12.283394  | -3.351038 | H | -10.115528 | 3.433979  | 0.0486    |
| H | -0.081405 | 9.846615   | -3.433938 | H | -10.115527 | -3.433967 | 0.049561  |
| H | -0.081405 | 9.846615   | 3.433938  | H | -12.553053 | -3.350991 | 0.092286  |
| H | -0.158007 | 12.283394  | 3.351038  | C | -13.977908 | 0.746071  | 0.116905  |
| C | -0.203401 | 13.707768  | -0.746121 | C | -13.97791  | -0.74604  | 0.117124  |
| C | -0.203401 | 13.707768  | 0.746121  | C | -15.08108  | 1.589015  | 0.13591   |
| C | -0.237898 | 14.810502  | -1.588999 | C | -16.443959 | 1.265405  | 0.159853  |
| C | -0.280987 | 16.173005  | -1.265414 | C | -17.037011 | 0.000023  | 0.170549  |
| C | -0.299932 | 16.765774  | 0         | C | -16.443961 | -1.265358 | 0.160229  |
| C | -0.280987 | 16.173005  | 1.265414  | C | -15.081078 | -1.588977 | 0.13638   |
| C | -0.237898 | 14.810502  | 1.588999  | H | -14.856989 | 2.654351  | 0.13174   |
| H | -0.230686 | 14.586478  | -2.654341 | H | -17.128196 | 2.109177  | 0.171638  |

|   |           |            |           |    |            |           |           |
|---|-----------|------------|-----------|----|------------|-----------|-----------|
| H | -0.302482 | 16.857007  | -2.109181 | H  | -18.124983 | 0.000027  | 0.189605  |
| H | -0.33431  | 17.853382  | 0         | H  | -17.128196 | -2.109127 | 0.172266  |
| H | -0.302482 | 16.857007  | 2.109181  | H  | -14.856988 | -2.654314 | 0.132524  |
| H | -0.230686 | 14.586478  | 2.654341  | C  | 14.471061  | 0.681139  | 0.595911  |
| C | -0.897556 | -14.491775 | -0.681683 | C  | 14.471067  | -0.681043 | 0.595848  |
| C | -0.897556 | -14.491775 | 0.681683  | H  | 15.299455  | 1.356337  | 0.760614  |
| H | -1.039355 | -15.321074 | -1.359561 | H  | 15.299467  | -1.356249 | 0.760488  |
| H | -1.039355 | -15.321074 | 1.359561  | N  | 12.318877  | 0.000065  | 0.182703  |
| N | -0.516755 | -12.362954 | 0         | Mg | 10.375097  | 0.000018  | -0.189568 |

#### Zn-P<sub>N</sub>-4A-A

|   |           |            |           |
|---|-----------|------------|-----------|
| C | -0.041633 | -9.242829  | 4.216845  |
| C | -0.210794 | -10.593121 | 4.20888   |
| C | -0.240431 | -11.005412 | 2.806053  |
| C | 0.328754  | -7.190379  | -1.144711 |
| C | 0.328754  | -7.190379  | 1.144711  |
| C | -0.041633 | -9.242829  | -4.216845 |
| C | -0.210794 | -10.593121 | -4.20888  |
| C | 0.047039  | -8.81037   | -2.820971 |
| C | -0.240431 | -11.005412 | -2.806053 |
| C | 0.047039  | -8.81037   | 2.820971  |
| N | -0.094608 | -9.913238  | 2.014086  |
| N | -0.394831 | -12.273099 | 2.397681  |
| N | -0.394831 | -12.273099 | -2.397681 |
| N | 0.215336  | -7.543408  | -2.444743 |
| N | 0.215336  | -7.543408  | 2.444743  |
| C | 0.284806  | -5.778965  | 0.728048  |
| C | 0.284806  | -5.778965  | -0.728048 |
| C | 0.236246  | -4.713573  | 1.584703  |
| C | 0.212238  | -3.31261   | 1.307511  |
| C | 0.202695  | -2.690583  | 0         |
| C | 0.212238  | -3.31261   | -1.307511 |
| C | 0.236246  | -4.713573  | -1.584703 |
| H | 0.219682  | -4.988402  | -2.637414 |
| H | 0.219682  | -4.988402  | 2.637414  |
| C | 0.074192  | 4.025881   | 0         |
| C | 0.086358  | 3.403668   | 1.305855  |
| C | 0.113192  | 2.006136   | 1.579501  |
| C | 0.086358  | 3.403668   | -1.305855 |
| C | 0.133776  | 0.919759   | 0.738847  |
| C | 0.113192  | 2.006136   | -1.579501 |

#### Ni-P<sub>N</sub>-4A-A

|   |           |            |           |
|---|-----------|------------|-----------|
| C | 0.000314  | -9.279908  | 4.129761  |
| C | 0.000551  | -10.63457  | 4.10795   |
| C | 0.000522  | -11.032553 | 2.713349  |
| C | -0.000153 | -7.227796  | -1.13125  |
| C | -0.000153 | -7.227796  | 1.13125   |
| C | 0.000314  | -9.279908  | -4.129761 |
| C | 0.000551  | -10.63457  | -4.10795  |
| C | 0.00022   | -8.835763  | -2.750295 |
| C | 0.000522  | -11.032553 | -2.713349 |
| C | 0.00022   | -8.835763  | 2.750295  |
| N | 0.000511  | -9.925536  | 1.893366  |
| N | 0.000595  | -12.314558 | 2.367461  |
| N | 0.000595  | -12.314558 | -2.367461 |
| N | -0.000034 | -7.554981  | -2.427017 |
| N | -0.000034 | -7.554981  | 2.427017  |
| C | -0.000328 | -5.823573  | 0.722742  |
| C | -0.000328 | -5.823573  | -0.722742 |
| C | -0.000552 | -4.760601  | 1.585621  |
| C | -0.000627 | -3.360979  | 1.307848  |
| C | -0.000624 | -2.738482  | 0         |
| C | -0.000627 | -3.360979  | -1.307848 |
| C | -0.000552 | -4.760601  | -1.585621 |
| H | -0.000596 | -5.036975  | -2.637634 |
| H | -0.000596 | -5.036975  | 2.637634  |
| C | -0.000514 | 3.978768   | 0         |
| C | -0.000558 | 3.356328   | 1.305817  |
| C | -0.000631 | 1.958972   | 1.579543  |
| C | -0.000558 | 3.356328   | -1.305817 |
| C | -0.000653 | 0.871896   | 0.738897  |
| C | -0.000631 | 1.958972   | -1.579543 |



|   |           |            |           |   |           |            |           |
|---|-----------|------------|-----------|---|-----------|------------|-----------|
| C | 0.133776  | 0.919759   | -0.738847 | C | -0.000653 | 0.871896   | -0.738897 |
| H | 0.117756  | 1.76575    | 2.640949  | H | -0.000651 | 1.718564   | 2.640997  |
| H | 0.117756  | 1.76575    | -2.640949 | H | -0.000651 | 1.718564   | -2.640997 |
| C | 0.159516  | -0.45979   | 1.162549  | C | -0.000666 | -0.507228  | 1.162493  |
| C | 0.175368  | -1.274532  | 0         | C | -0.000649 | -1.322456  | 0         |
| C | 0.159516  | -0.45979   | -1.162549 | C | -0.000666 | -0.507228  | -1.162493 |
| C | 0.193646  | -2.46721   | 2.459435  | C | -0.000701 | -2.514529  | 2.460243  |
| C | 0.168911  | -1.084805  | 2.414676  | C | -0.000709 | -1.132501  | 2.415053  |
| C | 0.168911  | -1.084805  | -2.414676 | C | -0.000709 | -1.132501  | -2.415053 |
| H | 0.200327  | -2.958961  | 3.427046  | H | -0.000736 | -3.006251  | 3.427874  |
| H | 0.156636  | -0.515256  | 3.339632  | H | -0.000744 | -0.562589  | 3.339879  |
| H | 0.156636  | -0.515256  | -3.339632 | H | -0.000744 | -0.562589  | -3.339879 |
| C | 0.193646  | -2.46721   | -2.459435 | C | -0.000701 | -2.514529  | -2.460243 |
| H | 0.200327  | -2.958961  | -3.427046 | H | -0.000736 | -3.006251  | -3.427874 |
| C | -0.046514 | 10.114317  | 1.305596  | C | 0.000026  | 10.068196  | 1.305576  |
| C | -0.018147 | 8.720756   | 1.579902  | C | -0.000134 | 8.674516   | 1.57992   |
| C | -0.046514 | 10.114317  | -1.305596 | C | 0.000026  | 10.068196  | -1.305576 |
| C | 0.00346   | 7.630985   | 0.739913  | C | -0.000236 | 7.584339   | 0.739964  |
| C | -0.018147 | 8.720756   | -1.579902 | C | -0.000134 | 8.674516   | -1.57992  |
| C | 0.00346   | 7.630985   | -0.739913 | C | -0.000236 | 7.584339   | -0.739964 |
| H | -0.013156 | 8.480587   | 2.641515  | H | -0.00016  | 8.434308   | 2.64154   |
| H | -0.013156 | 8.480587   | -2.641515 | H | -0.00016  | 8.434308   | -2.64154  |
| C | 0.030652  | 6.256333   | 1.163867  | C | -0.000356 | 6.209691   | 1.163848  |
| C | 0.046556  | 5.441591   | 0         | C | -0.000416 | 5.394748   | 0         |
| C | 0.030652  | 6.256333   | -1.163867 | C | -0.000356 | 6.209691   | -1.163848 |
| C | 0.07017   | 4.249758   | 2.461867  | C | -0.000517 | 4.202861   | 2.462096  |
| C | 0.043155  | 5.628826   | 2.41887   | C | -0.000416 | 5.581921   | 2.41907   |
| C | 0.07017   | 4.249758   | -2.461867 | C | -0.000517 | 4.202861   | -2.462096 |
| C | 0.043155  | 5.628826   | -2.41887  | C | -0.000416 | 5.581921   | -2.41907  |
| H | 0.079973  | 3.758714   | 3.430226  | H | -0.000561 | 3.711637   | 3.430414  |
| H | 0.03217   | 6.198015   | 3.34376   | H | -0.000385 | 6.15129    | 3.343919  |
| H | 0.079973  | 3.758714   | -3.430226 | H | -0.000561 | 3.711637   | -3.430414 |
| H | 0.03217   | 6.198015   | -3.34376  | H | -0.000385 | 6.15129    | -3.343919 |
| C | -0.407084 | -12.630526 | 1.112964  | C | 0.000446  | -12.671593 | 1.094702  |
| N | -0.094608 | -9.913238  | -2.014086 | N | 0.000511  | -9.925536  | -1.893366 |
| C | -0.407084 | -12.630526 | -1.112964 | C | 0.000446  | -12.671593 | -1.094702 |
| C | 0.456     | -8.007954  | 0         | C | -0.000112 | -8.085901  | 0         |
| C | -0.059437 | 10.735628  | 0         | C | 0.000103  | 10.689674  | 0         |
| H | -0.317744 | -11.268574 | 5.046552  | H | 0.000682  | -11.3422   | 4.92465   |
| H | 0.028792  | -8.575019  | 5.064709  | H | 0.000185  | -8.601167  | 4.970836  |
| H | -0.317744 | -11.268574 | -5.046552 | H | 0.000682  | -11.3422   | -4.92465  |
| H | 0.028792  | -8.575019  | -5.064709 | H | 0.000185  | -8.601167  | -4.970836 |

|    |           |            |           |    |          |            |           |
|----|-----------|------------|-----------|----|----------|------------|-----------|
| C  | -0.0637   | 10.962859  | -2.467161 | C  | 0.000117 | 10.917022  | -2.46725  |
| C  | -0.088733 | 12.152182  | 0         | C  | 0.000267 | 12.106542  | 0         |
| C  | -0.0637   | 10.962859  | 2.467161  | C  | 0.000117 | 10.917022  | 2.46725   |
| C  | -0.105539 | 12.967447  | -1.164981 | C  | 0.000361 | 12.921989  | -1.16498  |
| C  | -0.092197 | 12.335929  | -2.426969 | C  | 0.000285 | 12.290277  | -2.427051 |
| C  | -0.105539 | 12.967447  | 1.164981  | C  | 0.000361 | 12.921989  | 1.16498   |
| C  | -0.092197 | 12.335929  | 2.426969  | C  | 0.000285 | 12.290277  | 2.427051  |
| H  | -0.103786 | 12.906011  | -3.351021 | H  | 0.000345 | 12.860507  | -3.351086 |
| H  | -0.053193 | 10.468615  | -3.433971 | H  | 0.000047 | 10.422631  | -3.434044 |
| H  | -0.053193 | 10.468615  | 3.433971  | H  | 0.000047 | 10.422631  | 3.434044  |
| H  | -0.103786 | 12.906011  | 3.351021  | H  | 0.000345 | 12.860507  | 3.351086  |
| C  | -0.133843 | 14.330773  | -0.746083 | C  | 0.000537 | 14.285524  | -0.746116 |
| C  | -0.133843 | 14.330773  | 0.746083  | C  | 0.000537 | 14.285524  | 0.746116  |
| C  | -0.156683 | 15.433861  | -1.588998 | C  | 0.000672 | 15.388893  | -1.589018 |
| C  | -0.18522  | 16.79668   | -1.26539  | C  | 0.000878 | 16.751977  | -1.265392 |
| C  | -0.197768 | 17.38967   | 0         | C  | 0.000982 | 17.34511   | 0         |
| C  | -0.18522  | 16.79668   | 1.26539   | C  | 0.000878 | 16.751977  | 1.265392  |
| C  | -0.156683 | 15.433861  | 1.588998  | C  | 0.000672 | 15.388893  | 1.589018  |
| H  | -0.151913 | 15.209787  | -2.654338 | H  | 0.000618 | 15.164784  | -2.654364 |
| H  | -0.199458 | 17.480873  | -2.109159 | H  | 0.000973 | 17.436328  | -2.109159 |
| H  | -0.220535 | 18.477575  | 0         | H  | 0.001161 | 18.433253  | 0         |
| H  | -0.199458 | 17.480873  | 2.109159  | H  | 0.000973 | 17.436328  | 2.109159  |
| H  | -0.151913 | 15.209787  | 2.654338  | H  | 0.000618 | 15.164784  | 2.654364  |
| C  | -0.662069 | -14.001018 | -0.679346 | C  | 0.000523 | -14.064754 | -0.677239 |
| C  | -0.662069 | -14.001018 | 0.679346  | C  | 0.000523 | -14.064754 | 0.677239  |
| H  | -0.832114 | -14.822911 | -1.36078  | H  | 0.000604 | -14.894463 | -1.369745 |
| H  | -0.832114 | -14.822911 | 1.36078   | H  | 0.000604 | -14.894463 | 1.369745  |
| N  | -0.236    | -11.839236 | 0         | N  | 0.00032  | -11.842172 | 0         |
| Zn | 0.225067  | -9.930199  | 0         | Ni | 0.000341 | -9.933732  | 0         |

**PN-2A-N-2A-N**

|   |           |           |   |
|---|-----------|-----------|---|
| C | -1.787572 | -8.104185 | 0 |
| C | -3.180245 | -7.628453 | 0 |
| C | -1.823512 | -9.502044 | 0 |
| C | -4.352903 | -0.617027 | 0 |
| C | -4.799815 | -1.885148 | 0 |
| C | -3.600392 | -2.754712 | 0 |
| C | 1.333593  | -0.35655  | 0 |
| C | -0.833711 | 0.390915  | 0 |
| C | 3.48223   | -3.319314 | 0 |
| C | 3.055334  | -4.594452 | 0 |

|   |           |           |   |
|---|-----------|-----------|---|
| C | 2.263667  | -2.491381 | 0 |
| C | 1.575462  | -4.543634 | 0 |
| C | -4.037594 | -8.80362  | 0 |
| C | -2.882254 | -0.713376 | 0 |
| N | -2.444429 | -1.976875 | 0 |
| N | -3.770531 | -4.042821 | 0 |
| N | 0.919735  | -5.664688 | 0 |
| N | 2.378182  | -1.137168 | 0 |
| N | -2.138716 | 0.422314  | 0 |
| C | -0.631102 | -7.334724 | 0 |
| C | -3.596937 | -6.328736 | 0 |
| H | -4.666517 | -6.143792 | 0 |
| H | 0.308239  | -7.880958 | 0 |
| C | 0.021243  | 1.582874  | 0 |
| C | 1.394788  | 1.109826  | 0 |
| C | -0.458051 | 2.850778  | 0 |
| C | 0.265516  | 4.101348  | 0 |
| C | 1.708611  | 4.256387  | 0 |
| C | 2.751014  | 3.246468  | 0 |
| C | 2.552423  | 1.814887  | 0 |
| H | 3.457197  | 1.211243  | 0 |
| H | -1.542729 | 2.930986  | 0 |
| C | 3.914469  | 10.678134 | 0 |
| C | 2.476136  | 10.478747 | 0 |
| C | 1.760496  | 9.21225   | 0 |
| C | 4.926966  | 9.637235  | 0 |
| C | 2.19208   | 7.929051  | 0 |
| C | 4.713941  | 8.198067  | 0 |
| C | 3.585239  | 7.450435  | 0 |
| H | 0.679822  | 9.339426  | 0 |
| H | 5.645033  | 7.634975  | 0 |
| C | 1.330474  | 6.742881  | 0 |
| C | 2.168116  | 5.593206  | 0 |
| C | 3.535563  | 5.98499   | 0 |
| C | -0.538426 | 5.257525  | 0 |
| C | -0.041085 | 6.56663   | 0 |
| C | 4.508646  | 5.002371  | 0 |
| H | -1.614823 | 5.114638  | 0 |
| H | -0.730975 | 7.40501   | 0 |
| H | 5.568257  | 5.239342  | 0 |
| C | 4.095857  | 3.664045  | 0 |
| H | 4.856861  | 2.889543  | 0 |

|   |           |            |   |
|---|-----------|------------|---|
| C | 3.468295  | 13.131089  | 0 |
| C | 4.383217  | 12.043484  | 0 |
| C | 5.773224  | 12.339665  | 0 |
| C | 1.635491  | 11.597475  | 0 |
| C | 2.114048  | 12.913601  | 0 |
| C | 6.277498  | 10.003665  | 0 |
| C | 6.708309  | 11.336174  | 0 |
| H | 0.562644  | 11.431032  | 0 |
| H | 1.415787  | 13.744791  | 0 |
| H | 7.021734  | 9.213194   | 0 |
| H | 7.769874  | 11.563159  | 0 |
| H | -0.334631 | -1.672881  | 0 |
| C | -2.859419 | -5.086781  | 0 |
| N | 1.141565  | -3.217141  | 0 |
| C | -3.166079 | -9.954448  | 0 |
| C | -0.439926 | -5.930956  | 0 |
| C | -1.463488 | -4.937185  | 0 |
| H | -1.107189 | -3.914641  | 0 |
| H | -0.953399 | -10.14786  | 0 |
| C | -3.515145 | -11.33167  | 0 |
| C | -5.445217 | -8.769923  | 0 |
| C | -4.763474 | -11.900562 | 0 |
| C | -6.3385   | -9.826547  | 0 |
| C | -6.088812 | -11.212005 | 0 |
| C | -5.033924 | -13.305688 | 0 |
| C | -7.054334 | -12.215501 | 0 |
| C | -6.406003 | -13.484389 | 0 |
| H | -2.672135 | -12.022216 | 0 |
| H | -5.896492 | -7.781808  | 0 |
| H | -7.39227  | -9.55212   | 0 |
| H | -8.125087 | -12.051792 | 0 |
| H | -4.277486 | -14.080174 | 0 |
| H | -6.916613 | -14.440542 | 0 |
| H | 3.617411  | -5.517806  | 0 |
| H | 4.486691  | -2.919515  | 0 |
| H | -5.810714 | -2.268053  | 0 |
| H | -4.899301 | 0.315804   | 0 |
| H | 6.076092  | 13.38266   | 0 |
| H | 3.869941  | 14.140161  | 0 |
| N | 0         | -0.704898  | 0 |
